# Supplementary material for: High-capacity organic cathode active materials of 2,2′-bis-p-benzoquinone derivatives for rechargeable batteries
Source: Royal Society of Chemistry journal article supplement (doi:10.1039/c5ta10713j), 2016-01-01

## Supplementary Information

### High-capacity organic cathode active materials of 2,2'-bis-*p*-benzoquinone derivatives for rechargeable batteries

Takato Yokoji,<sup>a</sup> Yuki Kameyama,<sup>a</sup> Norihiko Maruyama<sup>b</sup> and Hiroshi Matsubara<sup>a,\*</sup>

<sup>a</sup> *Department of Chemistry, Graduate School of Science, Osaka Prefecture University, Sakai, Osaka, 599-8531, Japan*

<sup>b</sup> *Murata Manufacturing Co., Ltd., Nagaokakyo, Kyoto 617-8555, Japan.*

\* Corresponding author. Tel.: +81 72 254 9698; Fax: +81 72 254 9163. *E-mail address:* matsu@c.s.osakafu-u.ac.jp (H. Matsubara).

#### Contents

|                                                                            |     |
|----------------------------------------------------------------------------|-----|
| Fig. S1–S12 and Table S1                                                   | S2  |
| Electrolyte effects in charge-discharge curves and cycle performance       | S8  |
| Experimental details of preparations for cathode active materials          | S9  |
| Experimental details of DFT calculation and Gaussian archives              | S15 |
| Solubility study of BBQ derivatives                                        | S20 |
| References                                                                 | S21 |
| <sup>1</sup> H and <sup>13</sup> C NMR of compounds involved in this study | S22 |

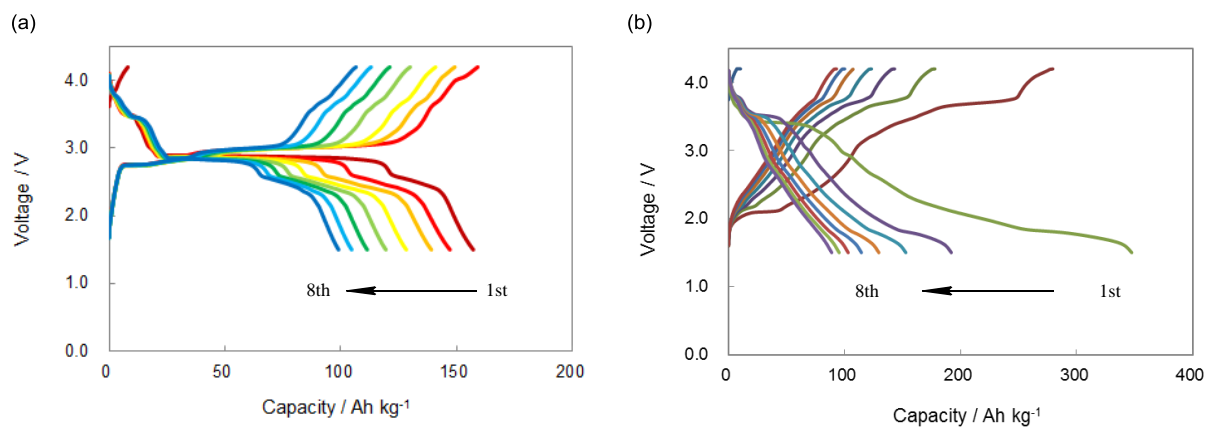

**Fig. S1** Charge-discharge curves and cycle-life performance over eight cycles for (a) BQ and (b) NDQ cells in 1.0 M LiPF<sub>6</sub>-EC/DEC.

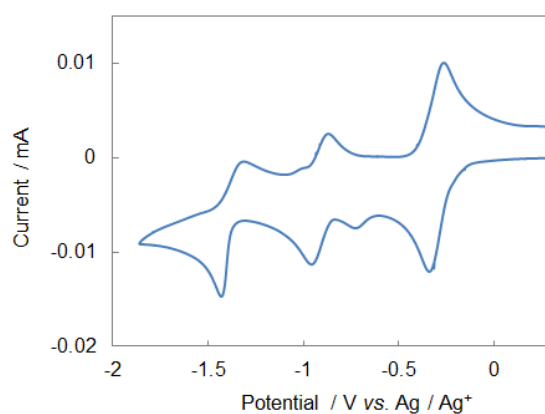

**Fig. S2** CV of NDQ in acetonitrile.

**Table S1** Electrochemical parameters and the enrgy levels of LUMO and HOMO for BQ and BBQ.

| Sample | $E_{1p,c}$ in solution CV (V) | Discharge voltage (V) | LUMO level (eV) | HOMO level (eV) |
|--------|-------------------------------|-----------------------|-----------------|-----------------|
| BQ     | -0.91                         | 2.8                   | -3.947          | -7.797          |
| BBQ    | -0.76                         | 2.9                   | -4.251          | -7.736          |
| NDQ    | -0.34                         | 1.8-3.4               | -4.645          | -7.404          |

DFT calculations were carried out on the B3LYP/6-31+G\* level.

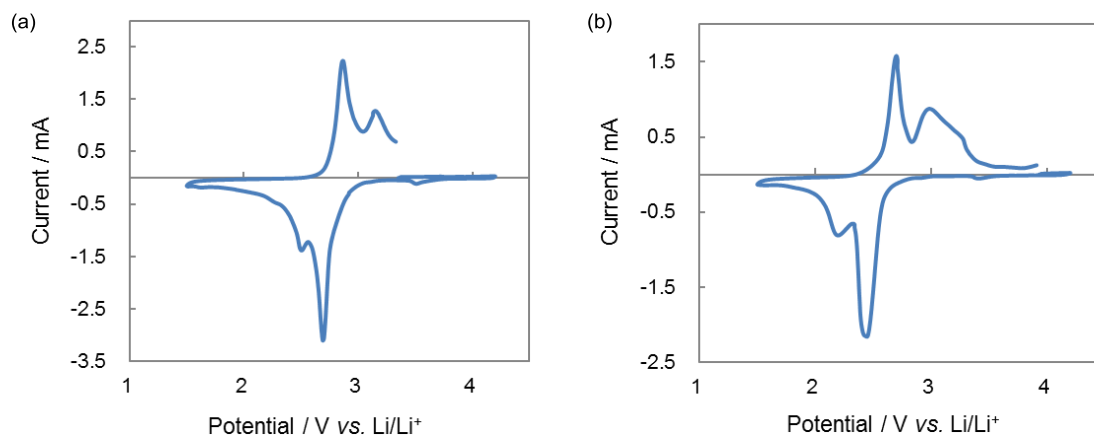

**Fig. S3** Electrode CVs of (a)  $\text{Br}_2^-$  and (b)  $\text{Me}_2\text{-BBQ}$  cells (1.0 M  $\text{LiPF}_6\text{-EC/DEC}$ ) at initial cycle.

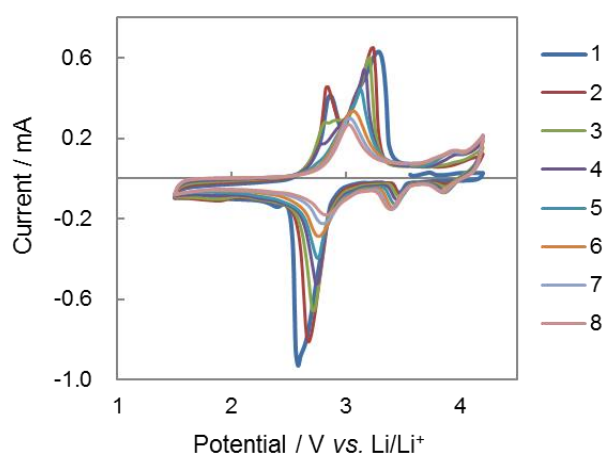

**Fig. S4** Electrode CVs of BBQ cells (1.0 M  $\text{LiPF}_6\text{-EC/DEC}$ ) from first to eighth cycles.

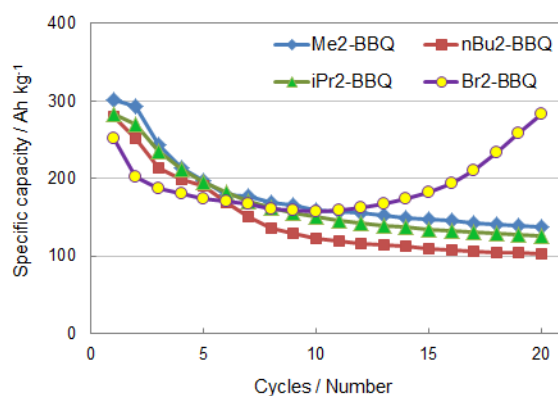

**Fig. S5** Cycle-life performance over twenty cycles for cells based on  $\text{R}_2\text{-BBQ}$  (R = Br, Me,  $n\text{Bu}$ , and  $i\text{Pr}$ ) in 2.75 M  $\text{LiTFSI}$ -tetraglyme systems.

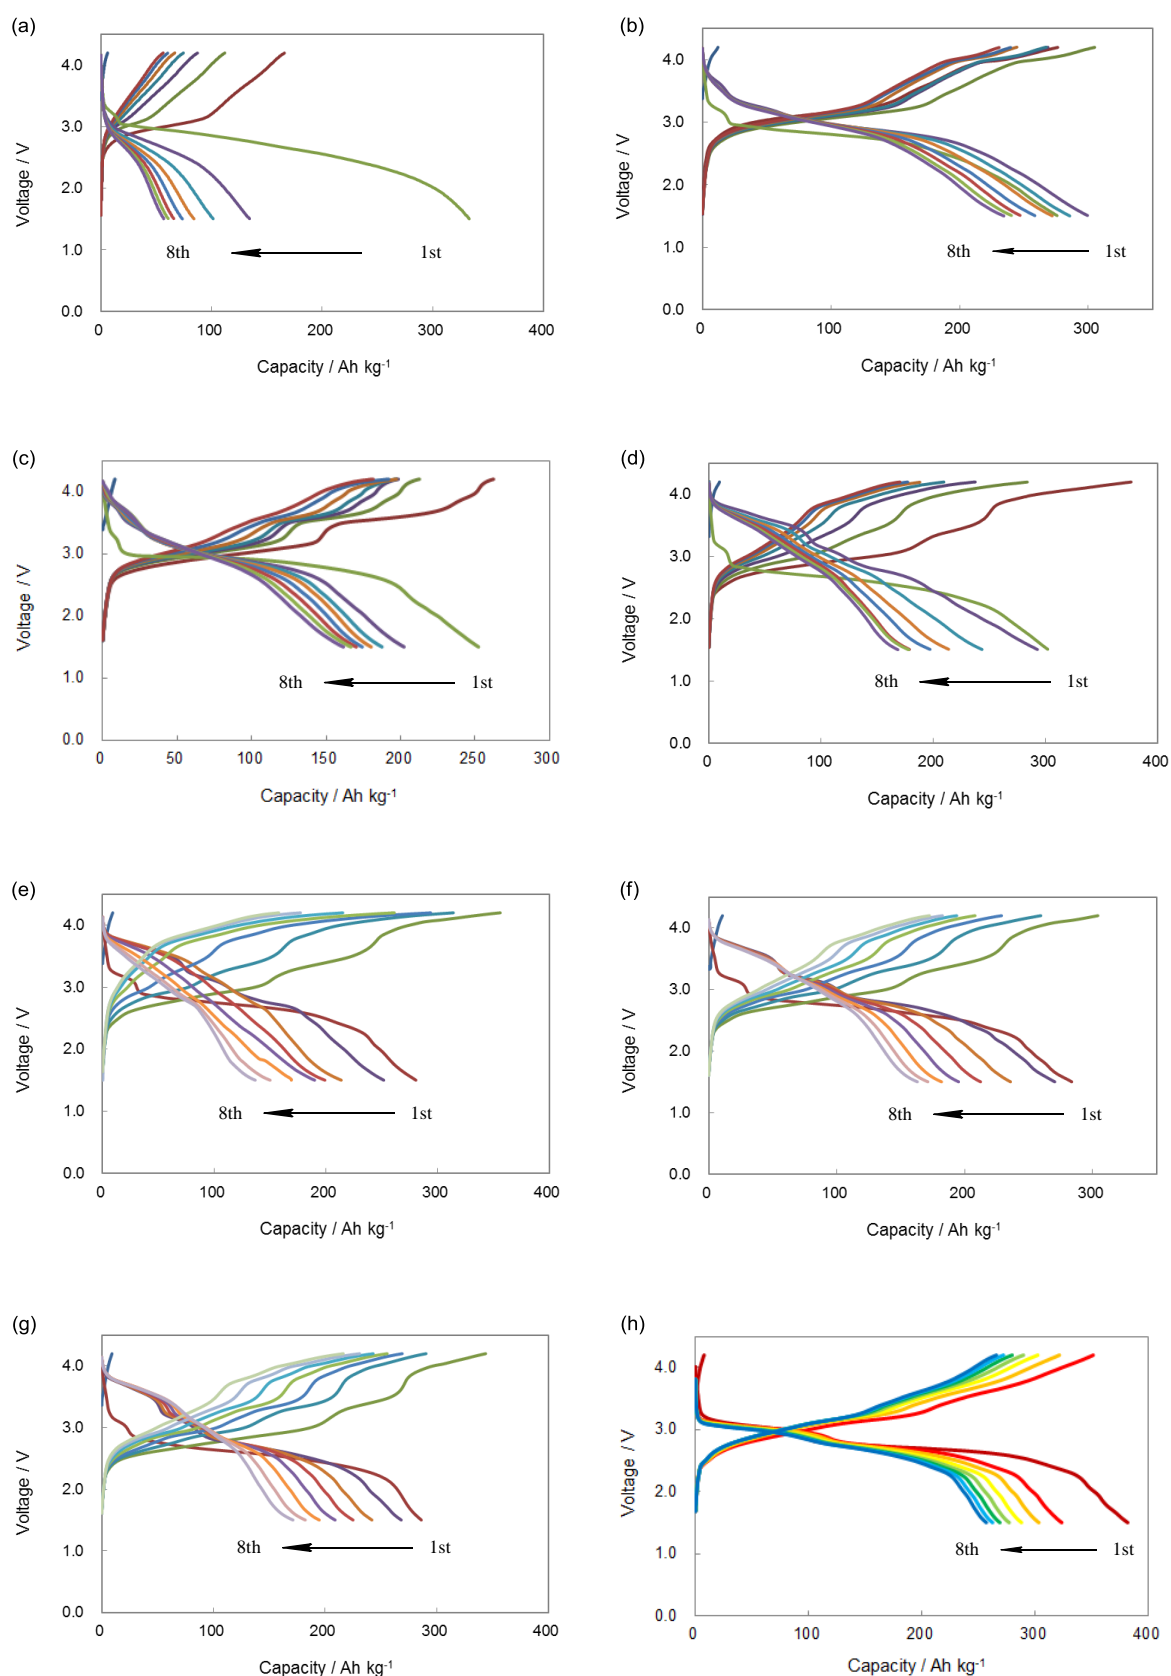

**Fig. S6** Charge-discharge curves and cycle-life performance over eight cycles for (a)  $\text{F}_2^-$ , (b)  $\text{Cl}_2^-$ , (c)  $\text{Br}_2^-$ , (d)  $\text{Me}_2^-$ , (e)  $n\text{Bu}_2^-$ , (f)  $i\text{Pr}_2^-$ , (g)  $t\text{Bu}_2^-$ , and (h)  $(\text{OMe})_2\text{-BBQ}$  cells in 2.75 M LiTFSI-tetraglyme systems.

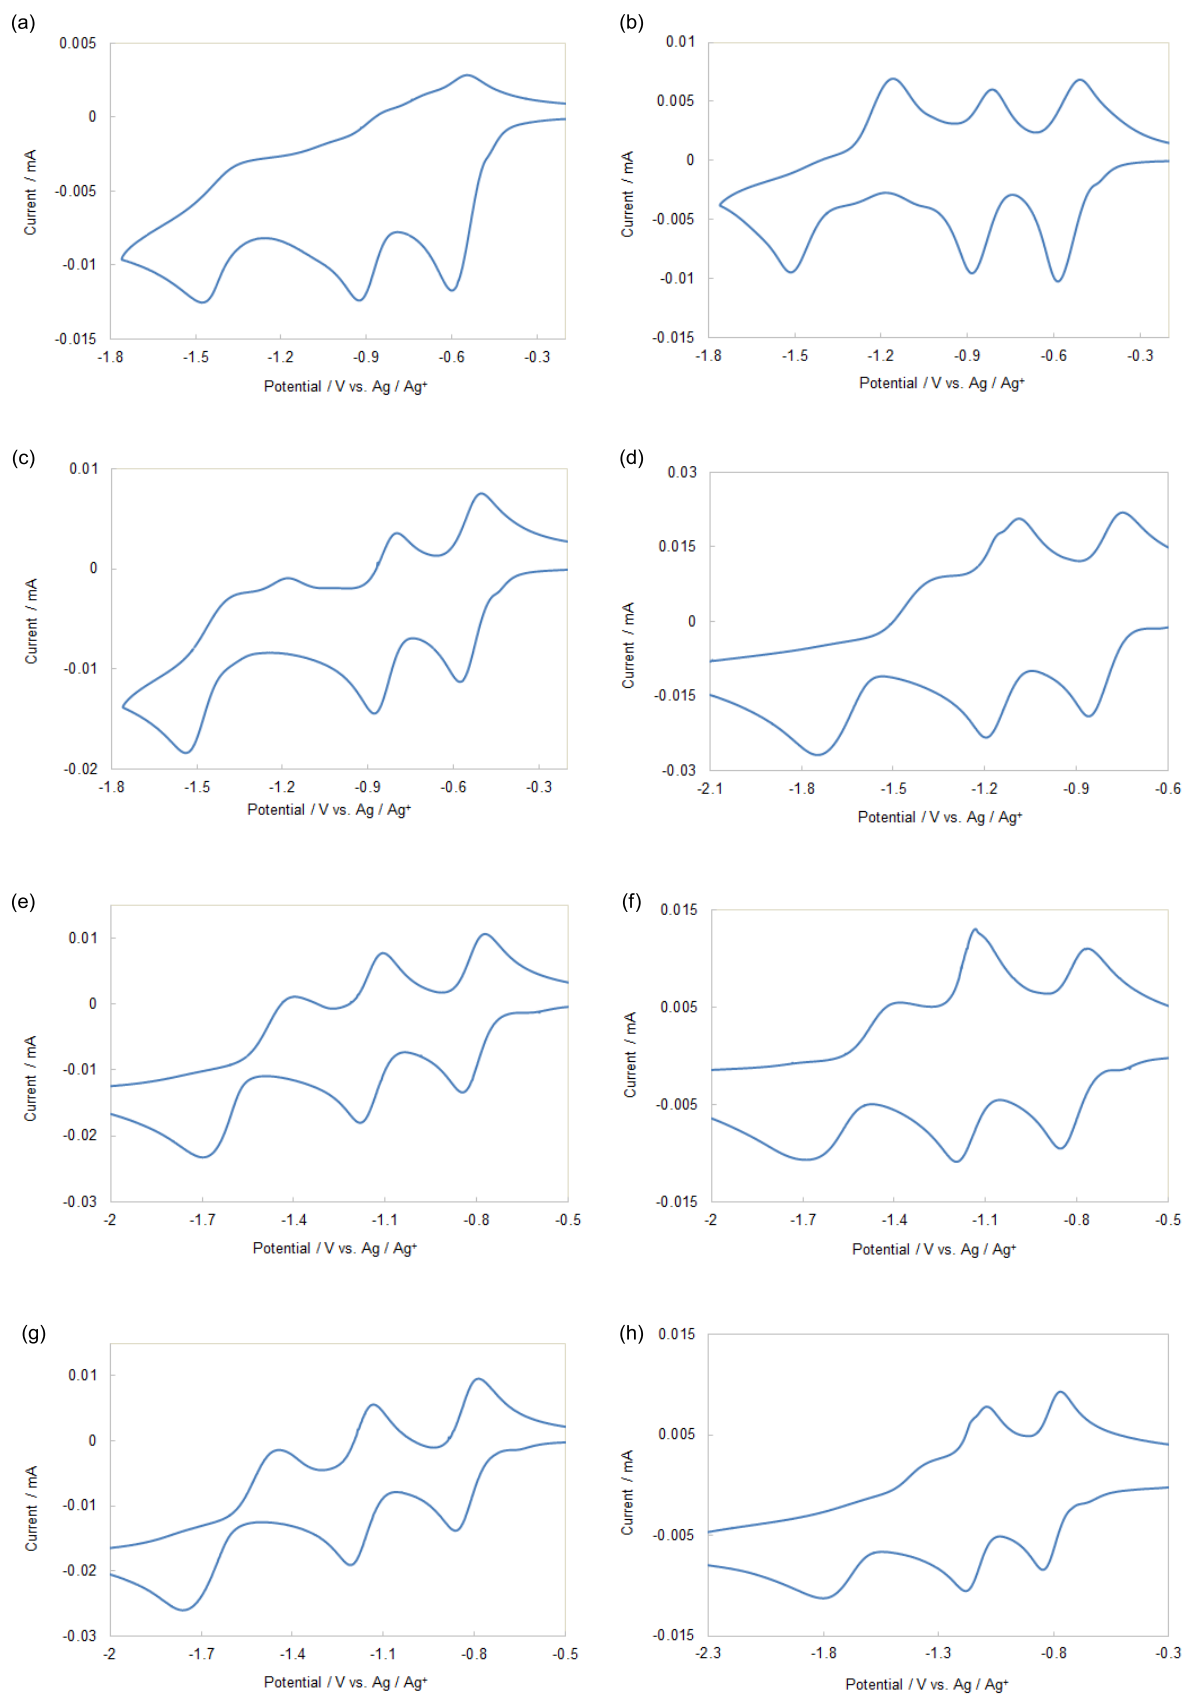

**Fig. S7** CV of (a)  $\text{F}_2^-$ , (b)  $\text{Cl}_2^-$ , (c)  $\text{Br}_2^-$ , (d)  $\text{Me}_2^-$ , (e)  $n\text{Bu}_2^-$ , (f)  $i\text{Pr}_2^-$ , (g)  $t\text{Bu}_2^-$ , and (h)  $(\text{OMe})_2\text{-BBQ}$  in acetonitrile.

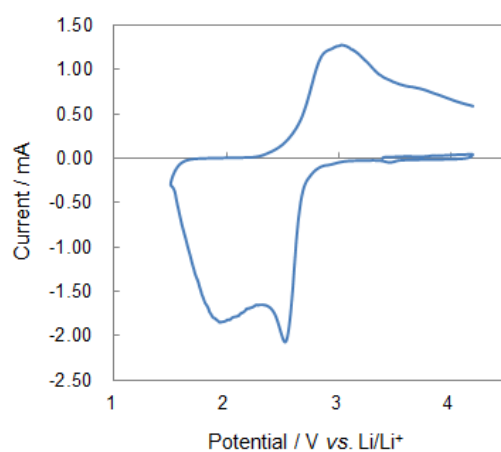

**Fig. S8** Electrode CV of (OMe)<sub>2</sub>-BBQ cells at initial cycle.

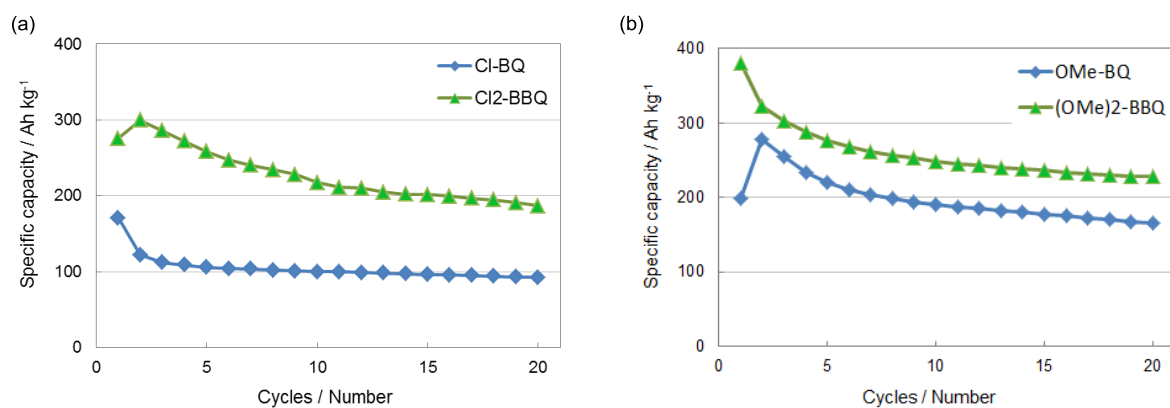

**Fig. S9** Cycle-life performance over twenty cycles for cells based on (a) Cl-BQ and Cl<sub>2</sub>-BBQ, and (b) OMe-BQ and (OMe)<sub>2</sub>-BBQ in 2.75 M LiTFSI-tetraglyme systems.

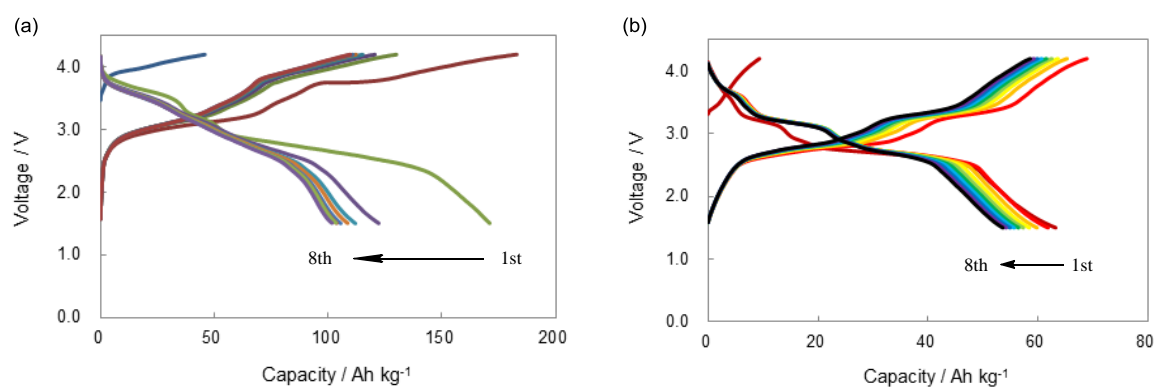

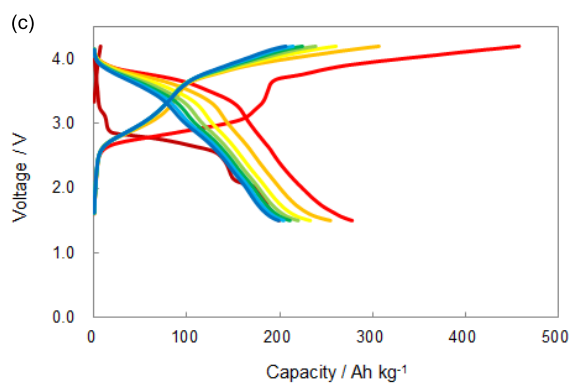

**Fig. S10** Charge-discharge curves and cycle-life performance over eight cycles for (a) Cl-BQ, (b) Me-BQ, and (c) OMe-BQ in 2.75 M LiTFSI-tetraglyme systems.

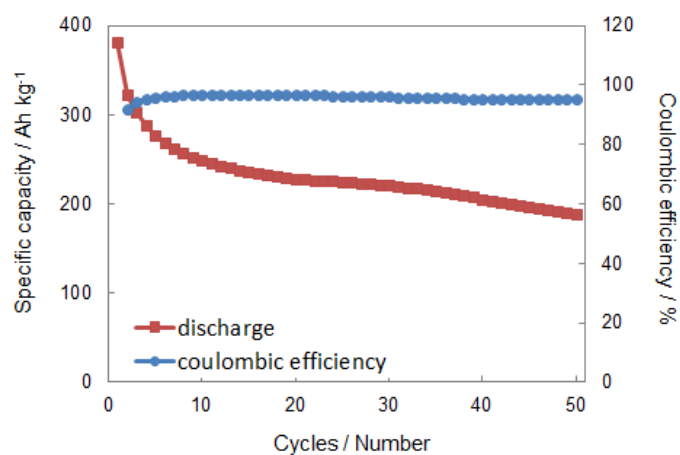

**Fig. S11** Cycle-life performance over 50th cycles for cells based on (OMe)<sub>2</sub>-BBQ in 2.75 M LiTFSI-tetraglyme systems.

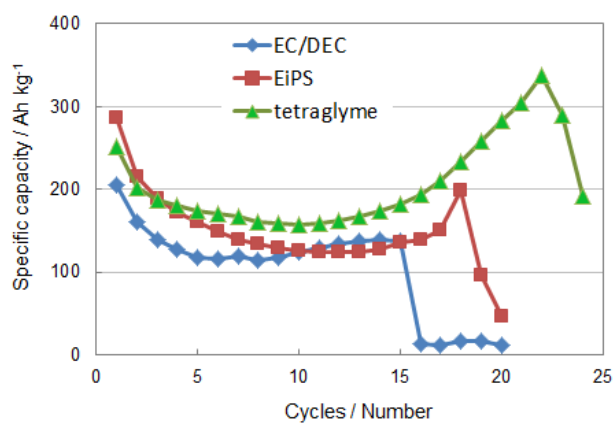

**Fig. S12** Cyclability for Br<sub>2</sub>-BBQ cells in 1.0 M LiPF<sub>6</sub>-EC/DEC, 1.0 M LiTFSI-EiPS, and 2.75 M LiTFSI-tetraglyme systems.

## Electrolyte effects in charge-discharge curves and cycle performance

Effects of the electrolyte in the BBQ cell was examined by preparing cells with three different electrolytes: EiPS with 1.0 M  $\text{LiN}(\text{SO}_2\text{CF}_3)_2$  (LiTFSI), tetraglyme with 2.75 M LiTFSI, and a mixture of EC (30 vol%) and DEC (70 vol%) with 1.0 M  $\text{LiPF}_6$ . The cyclability for the BBQ cells in different electrolytes is shown in Fig. S12, and the charge-discharge curves over eight cycles are depicted in Fig. S13. The LiTFSI-EiPS system provided the highest initial capacity of  $429 \text{ Ah kg}^{-1}$ , which exceeded the theoretical value involving three electrons ( $376 \text{ Ah kg}^{-1}$ ). However, its discharge capacity significantly faded to  $370 \text{ Ah kg}^{-1}$  in the second cycle. In the LiTFSI-tetraglyme system, the cell afforded an initial capacity of  $358 \text{ Ah kg}^{-1}$ , and surprisingly increased to  $368 \text{ Ah kg}^{-1}$  in the second cycle. Although the initial capacity in the tetraglyme system was smaller than in the EiPS system, tetraglyme afforded the highest cycle retention rate (the ratios of the 20th capacity to the 1st in the tetraglyme, EiPS, and EC/DEC systems were 67, 47, and 52%, respectively), and its capacity remained at  $239 \text{ Ah kg}^{-1}$  at the 20th cycle.

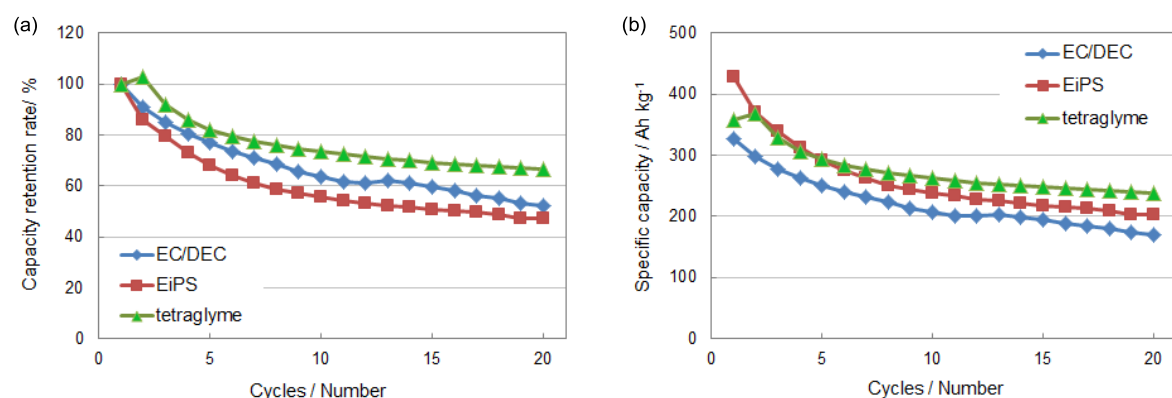

**Fig. S13** Cyclability over twenty cycles for BBQ cells in 1.0 M  $\text{LiPF}_6$ -EC/DEC, 1.0 M LiTFSI-EiPS, and 2.75 M LiTFSI-tetraglyme systems: plots of (a) capacity retention rate versus cycle number and (b) capacity retention rate versus cycle number.

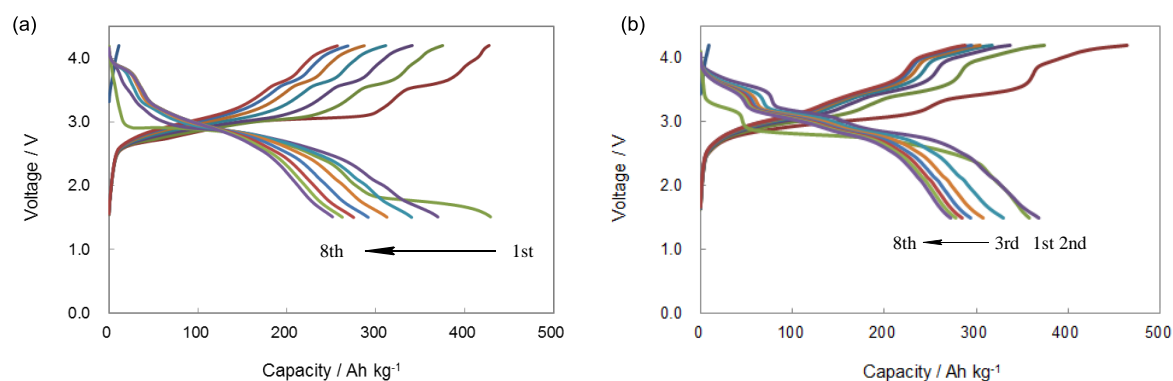

**Fig. S14** Charge-discharge curves and cycle-life performance over eight cycles for BBQ cells in (a) 1.0 M LiTFSI-EiPS, and (b) 2.75 M LiTFSI-tetraglyme systems.

## Experimental details of preparations for cathode active materials

Melting points were obtained with a Yanako micro melting point apparatus and are not corrected. Products were purified by flash chromatography on silica gel (Kanto Chemical Co., Inc., Silica Gel 60N (spherical, neutral), 63-210  $\mu\text{m}$ ).  $^1\text{H}$  NMR spectra were recorded with JEOL-ECP-500 (500 MHz) and JEOL-ECP-400 (400 MHz) spectrometers in  $\text{CDCl}_3$  or  $\text{DMSO-d}_6$ . Chemical shifts were reported in parts per million ( $\delta$ ) referenced to the solvent peak at 7.26 or 2.49 ppm.  $^{13}\text{C}$  NMR spectra were recorded with JEOL-ECP-500 (126 MHz) and JEOL-ECP-400 (100 MHz) spectrometers in  $\text{CDCl}_3$  or  $\text{DMSO-d}_6$ , and referenced to the solvent peak at 77.0 or 39.7 ppm. Coupling constants,  $J$ , were reported in Hertz (Hz), and splitting patterns were designated as s (singlet), d (doublet), t (triplet), sext (sextet), sept (septet), dd (double doublet), dt (double triplet) and m (multiplet). IR spectra were obtained on a JASCO FT/IR-4100 or a JASCO FT/IR-5300 spectrometer; absorptions were reported in reciprocal centimeters. Conventional mass spectra were recorded with SHIMADZU GCMS-QP2010Plus and JEOL MS-700 spectrometers, and high-resolution mass spectra were recorded with a JEOL MS-700 spectrometer. Unless otherwise noted, materials obtained from commercial suppliers were used without further purification.

### 1,4,5,8-Naphthodiquinone (NDQ)

A mixture of **1** (570 mg, 3.00 mmol) and [bis(trifluoroacetoxy)iodo]benzene (3.02 g, 7.02 mmol) in acetone (20 mL) was stirred for 1.5 h at room temperature. Then, [bis(trifluoroacetoxy)iodo]benzene (3.44 g, 8.00 mmol) was added to the reaction mixture, and the mixture was stirred at room temperature. After stirring for 2.5 h, the mixture was filtered through a glass filter, and the residue was washed with acetone and benzene, and then dried over under reduced pressure to yield **NDQ** (86 mg, 15%) as a brown solid. M.p. 204.5–208.0  $^{\circ}\text{C}$ ; IR (KBr):  $\nu$  = 3065, 1685, 1642, 1606, 1299, 1132, 865  $\text{cm}^{-1}$ ;  $^1\text{H}$  NMR (500 MHz,  $\text{DMSO-d}_6$ ):  $\delta$  = 6.89 (s, 4H; vinyl-H);  $^{13}\text{C}$  NMR (126 MHz,  $\text{DMSO-d}_6$ ):  $\delta$  = 186.0, 136.1, 126.3 ppm.

### 2,2'-Bis-*p*-benzoquinone (BBQ)

A mixture of **2** (2.75 g, 19.9 mmol), iodine (2.03 g, 8.01 mmol), iodic acid (1.04 g, 5.92 mmol), acetic acid (33 mL), water (7 mL), and sulfuric acid (1 mL) was heated to 60  $^{\circ}\text{C}$  for 5 h. After cooling to room temperature, the reaction mixture was poured into 10% aqueous  $\text{NaHSO}_3$ . The insoluble precipitate was filtered off using a glass filter, and then washed with diethyl ether. The aqueous layer was then separated and extracted with diethyl ether. The combined organic layer was washed with brine, dried over sodium sulfate, and evaporated under reduced pressure. The residue was purified by column chromatography on silica gel (eluent: hexane–chloroform = 2/1) to yield **3** (3.90 g, 74%) as a colorless liquid.  $^1\text{H}$  NMR (500 MHz,  $\text{CDCl}_3$ ):  $\delta$  = 7.33 (d,  $J$  = 2.8 Hz, 1H;  $\text{ClCH}$ ), 6.85 (dd,  $J$  = 9.2, 3.2 Hz, 1H;  $\text{ClC}(\text{OCH}_3)\text{CHCH}$ ), 6.74 (d,  $J$  = 8.7 Hz, 1H;  $\text{ClC}(\text{OCH}_3)\text{CH}$ ), 3.81 (s, 3H;  $\text{OCH}_3$ ), 3.74 (s,

3H; OCH<sub>3</sub>) ppm; <sup>13</sup>C NMR (126 MHz, CDCl<sub>3</sub>): δ = 154.1, 152.5, 124.7, 114.6, 111.5, 85.9, 56.9, 55.8 ppm; LRMS (EI): *m/z* (%): 264 (100) [M<sup>+</sup>], 249 (78), 122 (18), 107 (23), 79 (22).

A mixture of **3** (5.84 g, 22.1 mmol), copper (7.76 g, 122 mmol), 2,2'-bipyridine (347 mg, 2.22 mmol), and DMSO (40 mL) was heated at 150 °C under N<sub>2</sub> for 15 h. After cooling to room temperature, water (80 mL) was added with cooling by an ice bath. The mixture was then filtered through a pad of Celite and the pad was washed with diethyl ether. The aqueous layer was separated and extracted with diethyl ether. The combined organic layer was washed with brine, dried over sodium sulfate, and evaporated under reduced pressure. The residue was purified by column chromatography on silica gel (eluent: hexane–chloroform = 1/1 and 100% chloroform) to yield **4** (1.99 g, 66%) as a white crystalline solid. M.p. 96.0–98.0 °C; <sup>1</sup>H NMR (500 MHz, CDCl<sub>3</sub>): δ = 6.91 (d, *J* = 8.7 Hz, 2H; CC(OCH<sub>3</sub>)CH), 6.86 (dd, *J* = 8.7, 3.2 Hz, 2H; CC(OCH<sub>3</sub>)CHCH), 6.84 (d, *J* = 3.3 Hz, 2H; CCHC(OCH<sub>3</sub>)), 3.78 (s, 6H; OCH<sub>3</sub>), 3.73 (s, 6H; OCH<sub>3</sub>) ppm; <sup>13</sup>C NMR (126 MHz, CDCl<sub>3</sub>): δ = 153.2, 151.2, 128.5, 117.1, 113.3, 112.4, 56.4, 55.6 ppm; LRMS (EI): *m/z* (%): 274 (100) [M<sup>+</sup>], 259 (42), 244 (26), 228 (37), 213 (17).

To a mixture of **4** (551 mg, 2.01 mmol) in acetonitrile (15 mL), a solution of CAN (11.0 g, 6.00 mmol) in water (15 mL) was added at 0°C, the mixture was then warmed slowly to room temperature. After stirring for 1 h, water (60 mL) and dichloromethane (30 mL) was added to the mixture. The aqueous layer was then separated and extracted with dichloromethane. The combined organic layer was washed with brine, dried over sodium sulfate, and evaporated under reduced pressure. The residue was purified by column chromatography on silica gel (eluent: 100% chloroform and chloroform–ethyl acetate = 20/1) to yield **BBQ** (294 mg, 68%) as a yellow crystalline solid. M.p. 184.5–191.0 °C; IR (KBr): ν = 1657, 1594, 1351, 1293, 1280, 1101, 928, 918, 847 cm<sup>-1</sup>; <sup>1</sup>H NMR (500 MHz, CDCl<sub>3</sub>): δ = 6.89 (d, *J* = 10.1 Hz, 2H; CCOCH), 6.86 (dd, *J* = 10.1, 2.3 Hz, 2H; CCOCHCH), 6.83 (d, *J* = 2.3 Hz, 2H; CCHCO) ppm; <sup>13</sup>C NMR (126 MHz, CDCl<sub>3</sub>): δ = 186.2, 184.4, 139.9, 136.8, 136.6, 135.8 ppm; LRMS (EI): *m/z* (%): 214 (63) [M<sup>+</sup>], 186 (23), 130 (28), 102 (36), 82 (58), 54 (69), 50 (27), 44 (100).

### 5,5'-Difluoro-2,2'-bis-*p*-benzoquinone (F<sub>2</sub>-BBQ)

To a mixture of CAN (7.24 g, 13.2 mmol) in water (12 mL), a solution of **5** (625 mg, 4.00 mmol) in acetonitrile (12 mL) was added dropwise at room temperature. After stirring for 1.5 h, water (60 mL) was added to the mixture, and the mixture was filtered through a glass filter. The residue was washed with water and chloroform / hexane = 1 : 1, then dried over under reduced pressure to yield **F<sub>2</sub>-BBQ** (195 mg, 39%) as a yellow solid. M.p. 183.0–185.0 °C; IR (KBr): ν = 1685, 1656, 1604, 1357, 1163, 921 cm<sup>-1</sup>; <sup>1</sup>H NMR (400 MHz, CDCl<sub>3</sub>): δ = 6.87 (d, *J* = 7.6 Hz, 2H; CCHCO), 6.57 (d, *J* = 10.0 Hz, 2H; CFCH) ppm; <sup>13</sup>C NMR (100 MHz, CDCl<sub>3</sub>): δ = 184.1 (d, *J* = 14.3 Hz), 178.3 (d, *J* = 24.8 Hz), 159.6 (d, *J* = 292.2 Hz), 139.4, 134.4 (d, *J* = 2.8 Hz), 115.7 (d, *J* = 9.5 Hz) ppm; LRMS (EI): *m/z* (%): 250 (100) [M<sup>+</sup>], 129 (58), 73 (77), 69 (64), 60 (53), 57 (61), 55 (62); HRMS (EI): found [M<sup>+</sup>] 250.0073, C<sub>12</sub>H<sub>4</sub>F<sub>2</sub>O<sub>4</sub><sup>+</sup> requires 250.0078.

### 5,5'-Dichloro-2,2'-bis-*p*-benzoquinone (**Cl<sub>2</sub>-BBQ**)

To a mixture of CAN (7.24 g, 13.2 mmol) in water (12 mL), a solution of **6** (690 mg, 4.00 mmol) in acetonitrile (12 mL) was added dropwise at room temperature. After stirring for 1.5 h, water (60 mL) was added to the mixture, and the mixture was filtered through a glass filter. The residue was washed with water, and dried over under reduced pressure. Then, the residue was purified by column chromatography on silica gel (eluent: 100% chloroform), and by washing with water and chloroform / hexane = 1 : 1, then dried over under reduced pressure to yield **Cl<sub>2</sub>-BBQ** (176 mg, 31%) as a yellow solid. M.p. 196.0–199.0 °C; IR (KBr):  $\nu$  = 1670, 1653, 1608, 1570, 1320, 1194, 1010, 910 cm<sup>-1</sup>; <sup>1</sup>H NMR (400 MHz, CDCl<sub>3</sub>):  $\delta$  = 7.12 (s, 2H; CClCH), 7.00 (s, 2H; CCHCO) ppm; <sup>13</sup>C NMR (100 MHz, DMSO-d<sub>6</sub>):  $\delta$  = 182.8, 179.0, 143.1, 139.6, 136.0, 134.2 ppm; LRMS (EI):  $m/z$  (%): 286 (25), 284 (44), 282 (56) [M<sup>+</sup>], 149 (75), 84 (44), 81 (50), 73 (37), 69 (100), 57 (48), 55 (40).

### 5,5'-Dibromo-2,2'-bis-*p*-benzoquinone (**Br<sub>2</sub>-BBQ**)

To a mixture of CAN (7.24 g, 13.2 mmol) in water (12 mL), a solution of **7** (868 mg, 4.00 mmol) in acetonitrile (12 mL) was added dropwise at room temperature. After stirring for 1.5 h, water (60 mL) was added to the mixture, and the mixture was filtered through a glass filter. The residue was washed with water and chloroform / hexane = 1 : 1, then dried over under reduced pressure to yield **Br<sub>2</sub>-BBQ** (187 mg, 25%) as a yellow solid. M.p. 188.5–191.0 °C; IR (KBr):  $\nu$  = 1664, 1604, 1571, 1318, 1189, 984, 910, 438 cm<sup>-1</sup>; <sup>1</sup>H NMR (400 MHz, CDCl<sub>3</sub>):  $\delta$  = 7.40 (s, 2H; CBrCH), 7.04 (s, 2H; CCHCO) ppm; <sup>13</sup>C NMR (100 MHz, CDCl<sub>3</sub>):  $\delta$  = 181.7, 178.4, 139.0, 138.2, 137.7, 135.6 ppm; LRMS (EI):  $m/z$  (%): 374 (57), 372 (85), 370 (41) [M<sup>+</sup>], 149 (40), 86 (44), 84 (63), 81 (49), 73 (41), 69 (100), 57 (45), 55 (43).

### 5,5'-Dimethyl-2,2'-bis-*p*-benzoquinone (**Me<sub>2</sub>-BBQ**)

To a mixture of CAN (3.61 g, 6.60 mmol) in water (6 mL), a solution of **8** (304 mg, 2.00 mmol) in acetonitrile (6 mL) was added dropwise at room temperature. After stirring for 1 h, water (40 mL) was added to the mixture, and the mixture was filtered through a glass filter. The crude product obtained was washed with water, and then dried over under reduced pressure. The residue was recrystallized from chloroform / ethanol to yield **Me<sub>2</sub>-BBQ** (164 mg, 68%) as a yellow solid. Decomposition 167.0 °C; IR (KBr):  $\nu$  = 1649, 1629, 1577, 1234, 1205 cm<sup>-1</sup>; <sup>1</sup>H NMR (400 MHz, CDCl<sub>3</sub>):  $\delta$  = 6.81 (s, 2H; CCHCO), 6.70 (d,  $J$  = 1.6 Hz, 2H; C(CH<sub>3</sub>)CH), 2.10 (d,  $J$  = 1.2 Hz, 6H; CH<sub>3</sub>) ppm; <sup>13</sup>C NMR (100 MHz, CDCl<sub>3</sub>):  $\delta$  = 186.9, 184.7, 146.2, 139.5, 135.9, 133.6, 15.6 ppm; LRMS (EI):  $m/z$  (%): 242 (100) [M<sup>+</sup>], 146 (82), 118 (24), 68 (41), 40 (37).

### 5,5'-Dimethoxy-2,2'-bis-*p*-benzoquinone ((OMe)<sub>2</sub>-BBQ)

To a mixture of CAN (18.1 g, 33.0 mmol) in water (30 mL), a solution of **9** (1.68 g, 10.0 mmol) in acetonitrile (30 mL) was added dropwise at room temperature. After stirring for 1.5 h, water (150

mL) was added to the mixture, and the mixture was filtered through a glass filter. The residue was washed with water and methanol, then dried over under reduced pressure to yield **(OMe)<sub>2</sub>-BBQ** (93 mg, 7%) as a yellow solid. Decomposition 214.0 °C; IR (KBr):  $\nu$  = 1671, 1643, 1620, 1574, 1225, 1197, 1173, 998, 910  $\text{cm}^{-1}$ ;  $^1\text{H}$  NMR (400 MHz,  $\text{CDCl}_3$ ):  $\delta$  = 6.77 (s, 2H;  $\text{C}(\text{OCH}_3)\text{CH}$ ), 6.04 (s, 2H;  $\text{CCHCO}$ ), 3.87 (s, 6H;  $\text{OCH}_3$ ) ppm; Measurement of  $^{13}\text{C}$  NMR was unsuccessful because of low solubility of the product in general organic solvents; LRMS (EI):  $m/z$  (%): 274 (100) [ $\text{M}^+$ ], 245 (47), 231 (37), 201 (21), 69 (24).

#### 5,5'-Dibutyl-2,2'-bis-*p*-benzoquinone (*n*Bu<sub>2</sub>-BBQ)

To a mixture of **2** (277 mg, 2.00 mmol) and TMEDA (621 mg, 5.40 mmol) in dry hexane (4 mL), *n*-butyllithium (1.6 M hexane solution, 2.91 g, 6.00 mmol) was added dropwise at room temperature under  $\text{N}_2$ . After stirring for 20 h, the reaction mixture was cooled by an ice bath, 1-bromobutane (1.154 g, 8.40 mmol) was then added dropwise to the mixture, and the mixture was warmed slowly to room temperature. After stirring for 12 h, the mixture was quenched by adding excess amount of water dropwise. The aqueous layer was separated and extracted with diethyl ether. The combined organic layer was then washed with brine, dried over sodium sulfate, and evaporated under reduced pressure. The residue was purified by column chromatography on silica gel (eluent: hexane–chloroform = 4/1) to yield **10** (84 mg, 22%) as a colorless liquid. IR (neat):  $\nu$  = 2954, 2931, 1501, 1465, 1224, 1050  $\text{cm}^{-1}$ ;  $^1\text{H}$  NMR (400 MHz,  $\text{CDCl}_3$ ):  $\delta$  = 6.76 (d,  $J$  = 8.4 Hz, 1H;  $\text{CC}(\text{OCH}_3)\text{CH}$ ), 6.73 (d,  $J$  = 3.2 Hz, 1H;  $\text{CCHC}(\text{OCH}_3)$ ), 6.68 (dd,  $J$  = 8.8, 3.2 Hz, 1H;  $\text{CC}(\text{OCH}_3)\text{CHCH}$ ), 3.78 (s, 3H;  $\text{OCH}_3$ ), 3.76 (s, 3H;  $\text{OCH}_3$ ), 2.58 (t,  $J$  = 7.2 Hz, 2H;  $\text{Ar-CH}_2$ ), 1.59–1.52 (m, 2H;  $\text{ArCH}_2\text{CH}_2$ ), 1.37 (sext,  $J$  = 7.2 Hz, 2H;  $\text{CH}_2\text{CH}_3$ ), 0.93 (t,  $J$  = 7.6 Hz, 3H;  $\text{CH}_3$ ) ppm;  $^{13}\text{C}$  NMR (100 MHz,  $\text{CDCl}_3$ ):  $\delta$  = 153.3, 151.7, 132.4, 116.1, 110.9, 110.3, 55.6, 55.3, 32.0, 29.9, 22.5, 13.9 ppm; LRMS (EI):  $m/z$  (%): 194 (90) [ $\text{M}^+$ ], 152 (30), 151 (100), 137 (68), 121 (51), 91 (27), 77 (19).

To a mixture of CAN (3.77 g, 6.87 mmol) in water (15 mL), a solution of **10** (403 mg, 2.10 mmol) in acetonitrile (6 mL) was added dropwise at room temperature. After stirring for 1 h, water (60 mL) was added to the mixture. The mixture was filtered through a glass filter, and the residue was washed with water and then dried over under reduced pressure. The crude product obtained was recrystallized from chloroform / ethanol to yield ***n*Bu<sub>2</sub>-BBQ** (220 mg, 65%) as a yellow crystalline solid. M.p. 167.5–169.0 °C; IR (KBr):  $\nu$  = 2953, 2926, 1661, 1646, 923  $\text{cm}^{-1}$ ;  $^1\text{H}$  NMR (400 MHz,  $\text{CDCl}_3$ ):  $\delta$  = 6.80 (s, 2H;  $\text{CCHCO}$ ), 6.65 (t,  $J$  = 1.6 Hz, 2H;  $\text{C}(\text{nBu})\text{CH}$ ), 2.46 (dt,  $J$  = 7.8, 1.2 Hz, 4H;  $\text{CCH}_2$ ), 1.55–1.48 (m, 4H;  $\text{CCH}_2\text{CH}_2$ ), 1.41 (sext,  $J$  = 7.2 Hz, 4H;  $\text{CH}_2\text{CH}_3$ ), 0.95 (t,  $J$  = 7.2 Hz, 6H;  $\text{CH}_3$ ) ppm;  $^{13}\text{C}$  NMR (100 MHz,  $\text{CDCl}_3$ ):  $\delta$  = 186.8, 185.0, 150.0, 139.2, 136.2, 132.6, 29.8, 28.5, 22.4, 13.8 ppm; LRMS (EI):  $m/z$  (%): 328 (11), 327 (11) [ $\text{M}+\text{H}$ ]<sup>+</sup>, 155 (22), 138 (28), 137 (69), 136 (100), 107 (33), 91 (24), 90 (26), 89 (34), 77 (32).

#### 5,5'-Diisopropyl-2,2'-bis-*p*-benzoquinone (*i*Pr<sub>2</sub>-BBQ)

To a mixture of *n*-butyllithium (1.6 M hexane solution, 2.1 mL, 3.3 mmol) in dry THF (1 mL), a

solution of **2** (279 mg, 2.00 mmol) in dry THF (1.6 mL) was added at room temperature under argon. After stirring for 1 h, acetone (480 mg, 8.20 mmol) dissolved in dry THF (2.2 mL) was slowly added. After stirring for 1 h, the mixture was quenched by adding excess amount of water dropwise. The aqueous layer was then separated and extracted with diethyl ether. The combined organic layer was washed with brine, dried over sodium sulfate, and evaporated under reduced pressure. The residue was purified by column chromatography on silica gel (eluent: hexane–ether = 1/2) to yield **11** (186 mg, 47%) as a yellow liquid. IR (neat):  $\nu$  = 3444, 2965, 2939, 2834, 1491, 1464, 1420, 1281, 1218, 1178, 1070, 1050, 1026  $\text{cm}^{-1}$ ;  $^1\text{H}$  NMR (400 MHz,  $\text{CDCl}_3$ ):  $\delta$  = 6.91 (d,  $J$  = 3.2 Hz, 1H;  $\text{CCHC}(\text{OCH}_3)$ ), 6.85 (d,  $J$  = 8.6 Hz, 1H;  $\text{CC}(\text{OCH}_3)\text{CH}$ ), 6.74 (dd,  $J$  = 8.8, 3.2 Hz, 1H;  $\text{CC}(\text{OCH}_3)\text{CHCH}$ ), 4.25 (s, 1H; OH), 3.88 (s, 3H;  $\text{OCH}_3$ ), 3.78 (s, 3H;  $\text{OCH}_3$ ), 1.59 (s, 6H;  $\text{CH}_3$ ) ppm;  $^{13}\text{C}$  NMR (100 MHz,  $\text{CDCl}_3$ ):  $\delta$  = 153.5, 151.0, 137.1, 113.0, 111.9, 111.1, 72.4, 55.7, 55.6, 29.5 ppm; LRMS (EI):  $m/z$  (%): 196 (47) [ $\text{M}^+$ ], 181 (98), 43 (100).

To a mixture of 10% palladium on carbon (43 mg) and **11** (372 mg, 1.90 mmol) in ethyl acetate (5 mL), a drop of sulfuric acid was added, then the mixture was stirred at room temperature under the atmosphere of hydrogen using a balloon. After stirring for 24 h, water (50 mL) was added dropwise to the mixture. The palladium on carbon was filtered off, and the aqueous layer was separated and extracted with diethyl ether. The combined organic layer was washed with brine, dried over sodium sulfate, and evaporated under reduced pressure. The residue was purified by column chromatography on silica gel (eluent: hexane–chloroform = 4/1) to yield **12** (284 mg, 79%) as a yellow liquid. IR (neat):  $\nu$  = 2959, 1501, 1464, 1281, 1220, 1048  $\text{cm}^{-1}$ ;  $^1\text{H}$  NMR (400 MHz,  $\text{CDCl}_3$ ):  $\delta$  = 6.84 (d,  $J$  = 2.4 Hz, 1H;  $\text{CCHC}(\text{OCH}_3)$ ), 6.80 (d,  $J$  = 8.4 Hz, 1H;  $\text{CC}(\text{OCH}_3)\text{CH}$ ), 6.70 (dd,  $J$  = 8.4, 2.4 Hz, 1H;  $\text{CC}(\text{OCH}_3)\text{CHCH}$ ), 3.81 (s, 3H;  $\text{OCH}_3$ ), 3.80 (s, 3H;  $\text{OCH}_3$ ), 3.33 (sept,  $J$  = 6.8 Hz, 1H; CH), 1.23 (d,  $J$  = 7.6 Hz, 6H;  $\text{CH}_3$ ) ppm;  $^{13}\text{C}$  NMR (100 MHz,  $\text{CDCl}_3$ ):  $\delta$  = 153.7, 151.0, 138.4, 113.0, 111.2, 109.9, 56.0, 55.5, 26.8, 22.7 ppm; LRMS (EI):  $m/z$  (%): 180 (74) [ $\text{M}^+$ ], 165 (100), 150 (50), 105 (17).

To a mixture of CAN (1.15 g, 2.10 mmol) in water (4 mL), a solution of **12** (115 mg, 0.63 mmol) in acetonitrile (4 mL) was added dropwise at room temperature. After stirring for 1 h, water (40 mL) was added to the mixture. The mixture was filtered through a glass filter, and the residue was washed with water and then dried over under reduced pressure. The crude product obtained was recrystallized from chloroform / ethanol to yield **iPr<sub>2</sub>-BBQ** (76 mg, 81%) as a yellow crystalline solid. M.p. 173.5–175.0 °C; IR (KBr):  $\nu$  = 2966, 1653, 1600, 1233, 1048, 925  $\text{cm}^{-1}$ ;  $^1\text{H}$  NMR (400 MHz,  $\text{CDCl}_3$ ):  $\delta$  = 6.81 (s, 2H;  $\text{CCHCO}$ ), 6.63 (s, 2H;  $\text{C}(\text{iPr})\text{CH}$ ), 3.07 (sept,  $J$  = 6.4 Hz, 2H; CH), 1.16 (d,  $J$  = 6.8 Hz, 12H;  $\text{CH}_3$ ) ppm;  $^{13}\text{C}$  NMR (100 MHz,  $\text{CDCl}_3$ ):  $\delta$  = 186.4, 185.4, 155.3, 139.0, 136.4, 130.7, 26.8, 21.3 ppm; LRMS (EI):  $m/z$  (%): 300 (19), 299 (15), 298 (8) [ $\text{M}^+$ ], 154 (27), 149 (100), 136 (26), 83 (27), 81 (28), 71 (44), 69 (43), 57 (35), 55 (27); HRMS (EI): found [ $\text{M}^+$ ] 298.1193,  $\text{C}_{18}\text{H}_{18}\text{O}_4^+$  requires 298.1205.

### 5,5'-Di-*tert*-butyl-2,2'-bis-*p*-benzoquinone (*t*Bu<sub>2</sub>-BBQ)

To a mixture of sodium hydride (178 mg, 4.40 mmol) in DMF (3 mL), a solution of **13** (334 mg, 2.00

mmol) in DMF (3 mL) was added at room temperature under N<sub>2</sub>. Then, methyl iodide (1.36 g, 9.60 mmol) was slowly added to the mixture, and stirred for 4 h at 40 °C. After cooling to room temperature, the mixture was quenched by adding excess amount of water dropwise. The aqueous layer was then separated and extracted with diethyl ether. The combined organic layer was washed with brine, dried over sodium sulfate, and evaporated under reduced pressure. The residue was purified by column chromatography on silica gel (eluent: hexane–ether = 95/5) to yield **14** (323 mg, 83%) as a yellow liquid. IR (neat):  $\nu$  = 2952, 2927, 1499, 1488, 1464, 1283, 1221, 1059, 1032 cm<sup>-1</sup>; <sup>1</sup>H NMR (400 MHz, CDCl<sub>3</sub>):  $\delta$  = 6.89 (d,  $J$  = 3.2 Hz, 1H; C(*t*Bu)CH), 6.88 (d,  $J$  = 8.8 Hz, 1H; C(*t*Bu)C(OCH<sub>3</sub>)CH), 6.79 (dd,  $J$  = 8.4, 3.2 Hz, 1H; CC(OCH<sub>3</sub>)CHCH), 3.80 (s, 3H; OCH<sub>3</sub>), 3.77 (s, 3H; OCH<sub>3</sub>), 1.36 (s, 9H; CH<sub>3</sub>) ppm; <sup>13</sup>C NMR (100 MHz, CDCl<sub>3</sub>):  $\delta$  = 153.2, 152.8, 139.8, 114.2, 112.2, 109.7, 55.6, 55.5, 34.9, 29.6 ppm; LRMS (EI):  $m/z$  (%): 194 (56) [M<sup>+</sup>], 179 (100), 164 (36), 151 (36).

To a mixture of CAN (2.71 g, 4.90 mmol) in water (10 mL), a solution of **14** (320 mg, 1.70 mmol) in acetonitrile (10 mL) was added dropwise at room temperature. After stirring for 1 h, water (60 mL) was added to the mixture. The mixture was filtered through a glass filter, and the residue was washed with water and then dried over under reduced pressure. The crude product obtained was recrystallized from chloroform / ethanol to yield ***t*Bu<sub>2</sub>-BBQ** (150 mg, 56%) as a yellow crystalline solid. M.p. 194.0–196.0 °C; IR (KBr):  $\nu$  = 2956, 2924, 1658, 1630, 1594, 1362, 1237, 914 cm<sup>-1</sup>; <sup>1</sup>H NMR (400 MHz, CDCl<sub>3</sub>):  $\delta$  = 6.75 (s, 2H; CCHCO), 6.68 (s, 2H; C(*t*Bu)CH), 1.31 (s, 18H; CH<sub>3</sub>) ppm; <sup>13</sup>C NMR (100 MHz, CDCl<sub>3</sub>):  $\delta$  = 186.6, 185.6, 156.4, 138.0, 137.6, 131.9, 35.3, 29.0 ppm; LRMS (EI):  $m/z$  (%): 326 (48) [M<sup>+</sup>], 311 (56), 285 (36), 284 (87), 283 (34), 269 (100), 201 (48), 41 (40).

## Details of DFT calculations and Gaussian archives of optimized structures at the B3LYP/6-31+G\* level

DFT calculations were carried out using GAUSSIAN 09 program.<sup>1</sup> Geometry optimization were performed using standard gradient techniques at the B3LYP level of theory using restricted (RB3LYP) and unrestricted (UB3LYP) methods for closed- and open-shell systems, respectively.<sup>2</sup> In every case, 6-31+G\* was used as the basis set, and all ground states were verified by vibration frequency analysis. The calculated molecular structures were visualized by Gauss View 5.0.<sup>3</sup>

The singlet and triplet states of the BQ dianion, the doublet and quartet states of the trianion, and singlet, triplet, and quintet states of the tetraanion were calculated and summarised in the following Table. BQ dianion and trianion are more stable in singlet and doublet states than in triplet and quartet states, respectively, while BBQ dianion and trianion are more stable in triplet and doublet states than in singlet and quartet states, respectively. Although the BBQ tetraanion had similar energies in singlet and triplet states, the singlet was determined as the most stable state considering that the triplet state was highly spin contaminated.

| Species        | Spin state | Energy (kJ mol <sup>-1</sup> ) | <S <sup>2</sup> > value <sup>a</sup> |
|----------------|------------|--------------------------------|--------------------------------------|
| BQ dianion     | singlet    | -1001446.2                     | —                                    |
|                | triplet    | -1001326.5                     | 2.082                                |
| BQ trianion    | doublet    | -1000698.6                     | 0.751                                |
|                | quartet    | -1000623.0                     | 3.822                                |
| BBQ dianion    | singlet    | -2000099.7                     | —                                    |
|                | triplet    | -2000134.6                     | 2.278                                |
| BBQ trianion   | doublet    | -1999622.3                     | 1.360                                |
|                | quartet    | -1999553.6                     | 4.089                                |
| BBQ tetraanion | singlet    | -1998790.5                     | —                                    |
|                | triplet    | -1998789.7                     | 2.598                                |
|                | quintet    | -1998752.0                     | 6.406                                |

<sup>a</sup> Determined by the HF/6-31+G\* level.

### BQ

```
1\1\GINC-HEX\FOpt\RB3LYP\6-31+G(d)\C6H4O2\YOKOJI\10-Aug-2015\0\#B3LYP/6-31+G* opt=(ReadFC,Maxcycle=100) NoSymm freq=NoRaman geom=check guess=read\bqb3+\0,1\C,1.1473960993,0.6385839984,0.0000000008\C,-1.2455936404,1.2457168671,0.0000000035\C,-0.512664242,-1.1884288198,-0.0000000034\C,-1.6176902387,-0.1937182215,-0.0000000006\C,0.7752942945,-0.8008521598,0\C,0.0423659446,1.6332890664,-0.0000000026\H,-2.0720010581,1.9520647157,0.0000000074\H,-0.8119264774,-2.2335912849,-0.0000000048\H,0.341651651,2.6784450456,-0.0000000088\O,2.3221669073,0.9923242349,0.0000000025\O,-2.7924601291,-0.5474613541,0\H,1.6017108891,-1.5071845781,0.0000000059\\Version=EM64L-G09RevC.01\HF=-381.4704834\RMSD=3.710e-09\RMSF=1.597e-04\Dipole=0.0000008,0.0000037,0\Quadrupole=-9.3959157,6.969247,2.4266688,-5.4190299,0,0\PG=C01 [X(C6H4O2)]\@
```

### BQ anion radical

1\1\GINC-HEX\FOpt\UB3LYP\6-31+G(d)\C6H4O2(1,-2)\YOKOJI\07-Sep-2015\0\#B3LYP/6-31+G\* opt=(ReadFC,Maxcycle=100) NoSymm freq=NoRaman geom=check guess=read\|bqradanib3+\|-1,2\C,1.1701074551,0.6453203105,0.0000000002\C,-1.2465743574,1.1972606258,-0.0000000005\C,-0.5404529244,-1.1485372011,-0.0000000005\C,-1.6403988766,-0.2004556137,0.0000000001\C,0.7762825226,-0.7523958326,0.0000000001\C,0.0701615082,1.5934015139,0.0000000002\H,-2.0533614742,1.9300581383,-0.0000000004\H,-0.8087995645,-2.2049257995,-0.0000000005\H,0.3385081895,2.6497901472,-0.0000000005\O,2.3885404091,1.0121158865,0.0000000007\O,-2.8588325568,-0.567251678,0.0000000007\H,1.5830696694,-1.4851929873,-0.0000000004\Version=EM64L-G09RevC.01\HF=-381.5500259\S2=0.761125\S2-1=0.\S2A=0.75004\RMSD=5.840e-09\RMSF=4.801e-05\Dipole=0.0000022,0.0000005,0.\Quadrupole=-17.0104226,8.1357382,8.8746844,-8.129647,0.,0.\PG=CS [SG(C6H4O2)]\|@

### BQ dianion (singlet)

1\1\GINC-HEX\FOpt\RB3LYP\6-31+G(d)\C6H4O2(2-)\YOKOJI\07-Sep-2015\0\#B3LYP/6-31+G\* opt=(ReadFC,Maxcycle=100) NoSymm freq=NoRaman geom=check guess=read\|bqdianib3+\|-2,1\C,1.2060409451,0.6560230462,0.00000000015\C,-1.2528691485,1.1589064936,0.0000000013\C,-0.5671534805,-1.1200526782,-0.0000000006\C,-1.6763312212,-0.2111611783,0.0000000037\C,0.7825791502,-0.71404129,0.0000000021\C,0.0968597503,1.5649167725,0.0000000004\H,-2.0417433894,1.919837133,0.0000000022\H,-0.8051207041,-2.190000515,-0.0000000042\H,0.3348278472,2.6348643575,-0.0000000013\O,2.466028291,1.0351184497,-0.0000000061\O,-2.9363209113,-0.5902504951,-0.0000000047\H,1.5714528711,-1.4749725858,0.0000000058\Version=EM64L-G09RevC.01\HF=-381.4306621\RMSD=2.621e-09\RMSF=3.335e-05\Dipole=0.0000002,0.0000007,0.\Quadrupole=-26.5357374,10.0961101,16.4396273,-11.7316984,0.,0.\PG=C01 [X(C6H4O2)]\|@

### BQ dianion (triplet)

1\1\GINC-HEX\FOpt\UB3LYP\6-31+G(d)\C6H4O2(2,-3)\YOKOJI\07-Sep-2015\0\#B3LYP/6-31+G\* opt=(ReadFC,Maxcycle=100) NoSymm freq=NoRaman geom=check guess=read\|bqdiani\_tb3+\|-2,3\C,1.1517051528,0.6398139779,-0.0000000037\C,-1.2504952668,1.2090974392,-0.0000000021\C,-0.5371206073,-1.1605380364,-0.0000000008\C,-1.6219724052,-0.1949419362,-0.0000000034\C,0.7801736459,-0.7642009423,-0.0000000077\C,0.0668213364,1.6053601848,-0.0000000016\H,-2.0531257789,1.9492676641,0.0000000039\H,-0.7978887924,-2.2207948058,0.0000000053\H,0.3275890478,2.6656204715,-0.0000000041\O,2.3794228588,1.0094182017,0.0000000131\O,-2.8496660064,-0.5645403031,0.0000000041\H,1.5828068154,-1.5043744054,-0.0000000029\Version=EM64L-G09RevC.01\HF=-381.3850578\S2=2.010858\S2-1=0.\S2A=2.000029\RMSD=4.382e-09\RMSF=6.300e-05\Dipole=0.0006022,0.000176,0.\Quadrupole=-9.4420042,-14.5613075,24.0033117,2.0941194,0.,0.\PG=C01 [X(C6H4O2)]\|@

### BQ radical trianion (doublet)

1\1\GINC-I7\FOpt\UB3LYP\6-31+G(d)\C6H4O2(3,-2)\YOKOJI\24-Sep-2015\0\#B3LYP/6-31+G\* opt=(ReadFC,Maxcycle=100) NoSymm freq=NoRaman geom=check guess=read\|bqgradtrianib3+\|-3,2\C,1.1759334645,0.6469238006,-0.0000000037\C,-1.2589570636,1.1787564209,-0.0000000025\C,-0.5613350778,-1.139927229,-0.0000000013\C,-1.6462010964,-0.2020868079,-0.0000000027\C,0.7886323578,-0.7338498394,-0.0000000007\C,0.0910377929,1.5847931815,-0.0000000011\H,-2.0486933569,1.9375794324,-0.0000000015\H,-0.801197311,-2.2085933933,0.0000000037\H,0.3308731859,2.6534668673,0.0000000096\O,2.4515378956,1.0306295218,-0.0000000046\O,-2.921783745,-0.5858559938,0.0000000007\H,1.5784029539,-1.4926484511,0.0000000042\Version=EM64L-G09RevC.01\HF=-381.1459255\S2=0.750385\S2-1=0.\S2A=0.75\RMSD=6.496e-09\RMSF=1.409e-05\Dipole=0.0008225,-0.0000944,0.\Quadrupole=-19.332406,-14.5575759,33.8899819,-1.0103823,0.,0.\PG=C01 [X(C6H4O2)]\|@

### BQ trianion (quartet)

1\1\GINC-I7\FOpt\UB3LYP\6-31+G(d)\C6H4O2(3,-4)\YOKOJI\24-Sep-2015\0\#B3LYP/6-31+G\* opt=(ReadFC,Maxcycle=100) NoSymm freq=NoRaman geom=check guess=read\|bqtriani\_qb3+\|-3,4\C,1.1465935269,0.6375382051,0.0005394

374\C,-1.2518446907,1.2151280769,0.0000604907\C,-0.5361929961,-1.1660233197,-0.0004491558\C,-1.6168881742,-0.1927050116,-0.0005580095\C,0.7815707376,-0.7702772742,0.0001821872\C,0.0659073767,1.6109034044,0.0007657824\H,-2.0462786929,1.9631124019,-0.0000934307\H,-0.7868316804,-2.228014512,-0.0007447715\H,0.3165371537,2.6728997251,0.0004527883\O,2.3805113446,1.0084339042,0.0007273884\O,-2.8508343641,-0.5635454061,-0.0012267105\H,1.5760004589,-1.518258194,0.0003440037\Version=EM64L-G09RevC.01\HF=-381.1171206\S2=3.760769\S2-1=0.\S2A=3.750024\RMSD=9.435e-09\RMSF=2.076e-05\Dipole=-0.0003198,-0.0000959,-0.00115\Quadrupole=-5.8660167,-34.7434279,40.6094447,10.1303205,-0.0116159,-0.0205312\PG=C01 [X(C6H4O2)]\@

## BBQ

1\1\GINC-HEX\FOpt\RB3LYP\6-31+G(d)\C12H6O4\YOKOJI\12-Jun-2014\0\#B3LYP/6-31+G\* opt=(ReadFC,Maxcycle=100) NoSymm freq=NoRaman geom=check guess=read\bbqb3+\0,1\C,-1.2778582671,-1.4267324274,0.4361316144\C,-3.5932714274,-0.6508160007,0.0264002517\C,-1.6022139124,0.8575889265,-0.4311019121\C,-3.0712339914,0.6550742193,-0.4414232863\C,-0.7317500355,-0.1032558785,-0.0381814097\C,-2.7508698711,-1.6163630807,0.4284331341\H,-1.2700518354,1.8306300507,-0.7749048935\H,-3.0920156125,-2.5870845395,0.7778938327\O,-0.5487332502,-2.3290135418,0.831570026\O,-3.8252386423,1.5407150279,-0.8337297144\H,-4.6728577919,-0.7740987873,0.0189141313\C,3.0712338981,-0.6550740049,-0.4414242718\C,0.7317500293,0.1032558913,-0.0381815187\C,2.7508699601,1.6163628783,0.4284333068\C,1.2778583585,1.4267322155,0.436132027\C,3.5932714312,0.6508159938,0.0263997755\C,1.6022138223,-0.8575887245,-0.4311026702\H,3.0920157774,2.5870841691,0.7778943972\H,1.2700516728,-1.8306296847,-0.7749060479\O,3.8252384678,-1.5407146211,-0.8337312928\O,0.5487334258,2.329013131,0.8315710445\H,4.6728577939,0.7740987877,0.018913476\Version=EM64L-G09RevC.01\HF=-761.742748\RMSD=6.903e-09\RMSF=2.699e-06\Dipole=0.,0.,0.0415335\Quadrupole=3.0018799,-4.9835492,1.9816693,16.7248217,0.0000039,-0.0000035\PG=C01 [X(C12H6O4)]\@

## BBQ anion radical

1\1\GINC-HEX\FOpt\UB3LYP\6-31+G(d)\C12H6O4(1-,2)\YOKOJI\12-Jun-2014\0\#B3LYP/6-31+G\* opt=(ReadFC,Maxcycle=100) NoSymm freq=NoRaman geom=check guess=read\bbqradanib3+\-1,2\C,-1.2585144815,-1.4673858664,0.3295123518\C,-3.5747921519,-0.6318463078,0.0269395058\C,-1.6330455883,0.882427057,-0.331957872\C,-3.0705603905,0.6980890418,-0.3485093217\C,-0.7244018479,-0.1165374765,-0.0304275964\C,-2.7242339941,-1.6331054684,0.341691391\H,-1.2876360973,1.8755217011,-0.5887735852\H,-3.0709169042,-2.6275520533,0.6146420435\O,-0.5468158108,-2.43822992,0.6386828011\O,-3.8653397769,1.610626389,-0.6787163803\H,-4.6551040822,-0.7647790775,0.0269144395\C,3.0705605998,-0.6980890962,-0.3485086705\C,0.7244020481,0.1165373891,-0.0304275161\C,2.7242337216,1.6331054991,0.3416917827\C,1.2585142377,1.4673858553,0.3295123638\C,3.5747919957,0.6318463987,0.0269401689\C,1.6330459295,-0.8824271656,-0.3319575022\H,3.0709165321,2.6275521259,0.6146424294\H,1.287636588,-1.8755218653,-0.5887731975\O,3.8653402742,-1.6106263761,-0.6787154101\O,0.5468152842,2.4382298955,0.6386824182\H,4.6551039147,0.7647793208,0.0269153563\Version=EM64L-G09RevC.01\HF=-761.8470123\S2=0.770726\S2-1=0.\S2A=0.750203\RMSD=5.461e-09\RMSF=1.914e-06\Dipole=-0.0000018,-0.0000004,0.1935648\Quadrupole=-14.0494731,-2.0548402,16.1043133,19.101606,-0.000003,0.0000029\PG=C01 [X(C12H6O4)]\@

## BBQ dianion (singlet)

1\1\GINC-HEX\FOpt\RB3LYP\6-31+G(d)\C12H6O4(2-)\YOKOJI\12-Jun-2014\0\#B3LYP/6-31+G\* opt=(CalcFC,Maxcycle=100) NoSymm freq=NoRaman geom=check guess=read\bbqdiani\_sb3+\-2,1\C,-1.2495756318,-1.4986003841,0.2213382639\C,-3.5676619366,-0.6127674767,0.0473699671\C,-1.665904756,0.8981794996,-0.2603430762\C,-3.0872454416,0.7315898072,-0.2643001902\C,-0.7233088325,-0.1271184099,-0.0422303632\C,-2.7056199132,-1.6414525824,0.2803577067\H,-1.3071095909,1.9020696644,-0.4418755316\H,-3.0584530652,-2.6502695869,0.4971730927\O,-0.548198019,-2.5285388873,0.4154036359\O,-3.9225344585,1.6660807464,-0.525783855\H,-4.6496882494,-0.7576217608,0.0694310953\C,3.087325577,-0.731656962,-0.2631720628\C,0.7233219275,0.1271083688,-0.0420413817\C,2.7055348726,1.6415237519,0.2807681309\C,1.2495084574,1.498656885,0.2213407273\C,3.5676473773,0.6127792531,0.0483036658\C,1.6659837043,-0.8982451374,-0.2596069785\H,3.0583023939,2.6503953434,0.4974361296\H,1.3072428039,-1.902180638,-0.4409956269\O,3.9226939096,-1.6662145503,-0.5241635154\O,0.5480718568,2.5286443166,0.4149325839\H,4.6496670144,0.757638739

4,0.0706575824\\Version=EM64L-G09RevC.01\\HF=-761.7976553\\RMSD=2.897e-09\\RMSF=3.408e-06\\Dipole=-0.000050  
4,0.0000422,0.3337398\\Quadrupole=-33.0328518,0.7610427,32.2718091,22.5885661,-0.0128397,0.0074347\\PG=C01 [X(C  
12H6O4)]\\@

### BBQ dianion (triplet)

1\\1\\GINC-HEX\\FOpt\\UB3LYP\\6-31+G(d)\\C12H6O4(2-,3)\\YOKOJI\\12-Jun-2014\\0\\#B3LYP/6-31+G\* opt=(ReadFC,Maxc  
ycle=100) NoSymm freq=NoRaman geom=check guess=read\\bbqdiani\_tb3+\\-2,3\\C,-1.3258715512,-1.0347011127,1.030  
4103049\\C,-3.5446631596,-0.6070129483,-0.0136795176\\C,-1.5394365194,0.4558584498,-0.9240795707\\C,-2.975065382,  
0.2627335761,-1.0193718036\\C,-0.7372796096,-0.12742625,0.0352309775\\C,-2.7648495522,-1.210422278,0.9459969114  
\\H,-1.0942372801,1.1204710879,-1.663504999\\H,-3.2045837273,-1.8743365846,1.6916141165\\O,-0.639969088,-1.662844  
9436,1.8934913871\\O,-3.6862381957,0.8204962627,-1.924442379\\H,-4.6232213382,-0.7691712374,-0.0516736792\\C,2.97  
50660583,-0.262733432,-1.0193699972\\C,0.7372796172,0.1274260559,0.0352314807\\C,2.7648489209,1.2104221918,0.94  
59987501\\C,1.3258708885,1.0347008597,1.0304112614\\C,3.5446631432,0.6070131063,-0.013677319\\C,1.53943715,-0.45  
58584297,-0.9240786687\\H,3.204582575,1.874336504,1.6916162582\\H,1.0942384003,-1.1204709252,-1.663504522\\O,3.6  
862394819,-0.8204959817,-1.9244401648\\O,0.6399678509,1.6628444686,1.8934920499\\H,4.6232213171,0.7691715604,-0.  
051670877\\Version=EM64L-G09RevC.01\\HF=-761.8109459\\S2=2.021559\\S2-1=0.\\S2A=2.000233\\RMSD=9.051e-09\\RM  
SF=3.493e-06\\Dipole=-0.0000002,0.,0.5073304\\Quadrupole=-25.9708775,20.3556857,5.6151918,7.7762014,-0.0000092,0.0  
000041\\PG=C01 [X(C12H6O4)]\\@

### BBQ radical trianion (doublet)

1\\1\\GINC-HEX\\FOpt\\UB3LYP\\6-31+G(d)\\C12H6O4(3-,2)\\YOKOJI\\12-Jun-2014\\0\\#B3LYP/6-31+G\* opt=(ReadFC,Maxc  
ycle=100) NoSymm freq=NoRaman geom=check guess=read\\bbqradtrianib3+\\-3,2\\C,-1.256072923,-1.4807978561,0.42  
48186724\\C,-3.5537288613,-0.6072436752,-0.0552327445\\C,-1.6537937136,0.8577107886,-0.3135345976\\C,-3.074889599  
6,0.7000816849,-0.4218240357\\C,-0.7305694082,-0.1456219035,0.0590220951\\C,-2.6920538729,-1.6193755417,0.346855  
7947\\H,-1.2612500439,1.8445720016,-0.5394508919\\H,-3.0806170153,-2.6056100772,0.62014438\\O,-0.5452388681,-2.48  
10256276,0.8178273305\\O,-3.8880000752,1.6407010305,-0.8268030191\\H,-4.6344904314,-0.781851115,-0.1118256021\\C,  
3.074889702,-0.7000817351,-0.4218234483\\C,0.7305694783,0.1456219712,0.0590222453\\C,2.6920537407,1.6193755048,  
0.3468564383\\C,1.2560728089,1.4807979142,0.4248189048\\C,3.5537288352,0.6072436098,-0.055231944\\C,1.653793857  
4,-0.8577107738,-0.3135343365\\H,3.0806168876,2.6056100186,0.6201451212\\H,1.2612502161,-1.8445719604,-0.5394508  
111\\O,3.8880003193,-1.640701099,-0.8268022957\\O,0.5452385453,2.4810257649,0.8178272531\\H,4.6344904217,0.78185  
10755,-0.111824509\\Version=EM64L-G09RevC.01\\HF=-761.6157972\\S2=0.768778\\S2-1=0.\\S2A=0.750205\\RMSD=8.474  
e-09\\RMSF=2.784e-06\\Dipole=-0.0000019,-0.0000004,0.3268645\\Quadrupole=-49.2702799,5.9054319,43.364848,21.0406  
65,-0.0000072,0.0000001\\PG=C01 [X(C12H6O4)]\\@

### BBQ trianion (quartet)

1\\1\\GINC-HEX\\FOpt\\UB3LYP\\6-31+G(d)\\C12H6O4(3-,4)\\YOKOJI\\17-Jun-2014\\0\\#B3LYP/6-31+G\* opt=(ReadFC,Maxc  
ycle=100) NoSymm freq=NoRaman scf=xqc geom=check guess=read\\bbqtriani\_qb3+\\-3,4\\C,-1.2842671189,-1.4051815  
606,-0.6060173101\\C,-3.5458451484,-0.6334066644,0.0858514723\\C,-1.5995559077,0.8087176347,0.435200155\\C,-3.029  
1632316,0.6269466423,0.5764245278\\C,-0.7356827313,-0.1324022159,-0.1002233141\\C,-2.7205192325,-1.5818598722,-0.  
4698280489\\H,-1.1985191344,1.7562671575,0.7869898712\\H,-3.1347058875,-2.5215159617,-0.8395474335\\O,-0.5727530  
962,-2.3124873439,-1.1477562906\\O,-3.7836940096,1.5174783662,1.1121725234\\H,-4.6191213913,-0.817558773,0.16655  
9936\\C,3.0291615906,-0.6269462465,0.5764587169\\C,0.735685319,0.132395031,-0.1002095913\\C,2.7205187002,1.58186  
57442,-0.4697860907\\C,1.284269886,1.4051791028,-0.6059933114\\C,3.5458418615,0.6334130493,0.0858988385\\C,1.599  
5569216,-0.808724409,0.4352177817\\H,3.1347050507,2.5215252624,-0.8394964783\\H,1.1985211688,-1.7562788881,0.78  
69949815\\O,3.7836927431,-1.5174772269,1.1122082172\\O,0.5727572501,2.3124813694,-1.1477396286\\H,4.6191163978,0.  
8175698022,0.1666204761\\Version=EM64L-G09RevC.01\\HF=-761.5896338\\S2=3.770541\\S2-1=0.\\S2A=3.750158\\RMSD  
=5.488e-07\\RMSF=3.439e-05\\Dipole=-0.0000024,-0.0000033,0.6381637\\Quadrupole=-81.1018574,19.618495,61.4833625,-  
23.7080612,-0.0009921,-0.000295\\PG=C01 [X(C12H6O4)]\\@

### BBQ tetraanion (singlet)

1\1\GINC-HEX\FOpt\RB3LYP\6-31+G(d)\C12H6O4(4-)\YOKOJI\16-Jun-2014\0\#B3LYP/6-31+G\* opt=(ReadFC,Maxcycle=100) NoSymm freq=NoRaman scf=xqc geom=check guess=read\bbqtetraanib3+\-4,1\C,-1.3158815861,-1.3035060061,0.8745945234\C,-3.532418039,-0.6331056249,-0.1363302079\C,-1.5893838612,0.6660062056,-0.6155060674\C,-3.0031653406,0.4924983054,-0.8295389648\C,-0.7451874462,-0.1574182512,0.1576396787\C,-2.7287418197,-1.4681381578,0.6728848325\H,-1.1287456698,1.5178645905,-1.1220294858\H,-3.1837422558,-2.336773485,1.1687691311\O,-0.6422463236,-2.1220309819,1.6416649036\O,-3.7357929631,1.2944304007,-1.6014723876\H,-4.6140459882,-0.8206688787,-0.2106227685\C,3.0031623435,-0.4925004681,-0.8295483905\C,0.7451879769,0.1574187701,0.1576364636\C,2.7287441939,1.4681400442,0.6728710926\C,1.3158848589,1.3035079014,0.8745868904\C,3.5324175028,0.6331052917,-0.1363444837\C,1.5893815907,-0.6660077082,-0.6155101862\H,3.183746406,2.3367769366,1.1687510771\H,1.1287415366,-1.5178672212,-1.1220299982\O,3.7357872108,-1.2944344648,-1.6014824544\O,0.6422525711,2.1220340307,1.641658677\H,4.6140451023,0.8206687708,-0.210641875\Version=EM64L-G09RevC.01\HF=-761.2989724\RMSD=4.016e-09\RMSF=4.539e-06\Dipole=-0.0000001,0.0000002,0.180132\Quadrupole=-66.6988359,28.2781056,38.4207304,3.2724201,0.0001762,0.0000013\PG=C01 [X(C12H6O4)]\@

### BBQ tetraanion (triplet)

1\1\GINC-HEX\FOpt\UB3LYP\6-31+G(d)\C12H6O4(4-,3)\YOKOJI\19-Jun-2014\0\#B3LYP/6-31+G\* opt=(CalcFC,Maxcycle=100) NoSymm freq=NoRaman scf=xqc geom=check guess=read\bbqtetraani\_tb3+\-4,3\C,-1.2734713324,-1.5393493684,0.0033267464\C,-3.590627229,-0.6119734496,0.0048424361\C,-1.6999291012,0.9014650636,0.0010233927\C,-3.1233706761,0.7518266013,0.0026712716\C,-0.7351071286,-0.1502141051,0.0010623659\C,-2.7137372459,-1.6830613331,0.0054381154\H,-1.3185397769,1.9152733109,-0.0003225933\H,-3.093640016,-2.7070756421,0.0072607166\O,-0.5699374542,-2.6251415142,0.003606555\O,-3.9653492816,1.7622527222,0.0022507977\H,-4.6710914604,-0.793271028,0.0062853092\C,3.1234396256,-0.7518288444,-0.0045526817\C,0.7351282461,0.1501901297,-0.001218827\C,2.7136503186,1.6830557987,-0.0035609879\C,1.2734013615,1.5393352363,-0.0018669063\C,3.5906041639,0.6119910936,-0.0049341399\C,1.700153728,-0.9014706728,-0.0025961448\H,3.0935318762,2.7070888662,-0.0038129616\H,1.3186927956,-1.9153012486,-0.0020326426\O,3.9654694232,-1.762247446,-0.0058600534\O,0.5698023984,2.6251112063,-0.0005612992\H,4.6710651204,0.7933446235,-0.0064484689\Version=EM64L-G09RevC.01\HF=-761.2986676\S2=2.022721\S2-1=0.\S2A=2.000187\RMSD=9.681e-09\RMSF=1.545e-05\Dipole=0.0008642,0.0008478,-0.0023441\Quadrupole=-102.6508154,10.4564442,92.1943711,-21.8329575,0.2587467,0.0717221\PG=C01 [X(C12H6O4)]\@

### BBQ tetraanion (quintet)

1\1\GINC-HEX\FOpt\UB3LYP\6-31+G(d)\C12H6O4(4-,5)\YOKOJI\26-Dec-2014\0\#B3LYP/6-31+G\* opt=(ReadFC,Maxcycle=100) NoSymm freq=NoRaman scf=xqc geom=check guess=read\bbqtetraani\_qub3+\-4,5\C,-1.2933177273,-1.3945278716,-0.6371311391\C,-3.5599124684,-0.6404868713,0.0841121338\C,-1.6019532903,0.7936590894,0.4541259933\C,-3.03313509,0.6131201025,0.5877373773\C,-0.7374064256,-0.136612997,-0.1018949959\C,-2.7292916921,-1.5817515962,-0.477118843\H,-1.1993911149,1.7342876322,0.8255850801\H,-3.1517758884,-2.5183974536,-0.8455260193\O,-0.5862809126,-2.2826843206,-1.2202463807\O,-3.7808157637,1.509185332,1.1341765195\H,-4.6304686621,-0.8375760675,0.1650293996\C,3.0316271257,-0.6125883409,0.5959692105\C,0.7376591111,0.1365338264,-0.100151927\C,2.7305022728,1.5813236531,-0.4716345174\C,1.2949361644,1.3939582249,-0.6351207027\C,3.5596886419,0.6405617503,0.0925523182\C,1.6007860499,-0.7932409899,0.4588999543\H,3.1539266631,2.5176326202,-0.8398188142\H,1.1972797877,-1.733530596,0.8301918053\O,3.7779198473,-1.5081708285,1.1450906158\O,0.5893845299,2.281589938,-1.2208284544\H,4.6300388416,0.8377157641,0.1760013858\Version=EM64L-G09RevC.01\HF=-761.2843424\S2=6.020381\S2-1=0.\S2A=6.000126\RMSD=3.539e-09\RMSF=5.177e-06\Dipole=-0.0012267,0.0004061,0.9345762\Quadrupole=-131.7106807,36.654948,95.0557327,-52.9685106,-0.2627032,-0.0405227\PG=C01 [X(C12H6O4)]\@

## Solubility study of BBQ derivatives

The solubilities of BBQ derivatives were measured for the non-substituted BBQ and R<sub>2</sub>-BBQ (R = F, Cl, Br, Me, *n*Bu, and OMe) using tetraglyme as the electrolyte solution. The obtained solubilities and the related battery performance are summarized in the following table.

| Solubility of the BBQs in tetraglyme and the related battery performance. |                                               |                                     |
|---------------------------------------------------------------------------|-----------------------------------------------|-------------------------------------|
| Sample                                                                    | Solubility in tetraglyme (g L <sup>-1</sup> ) | Capacity retention <sup>a</sup> (%) |
| BBQ                                                                       | 4.0-5.0                                       | 67                                  |
| F <sub>2</sub> -BBQ                                                       | 18-19                                         | 12                                  |
| Cl <sub>2</sub> -BBQ                                                      | 9.0-10                                        | 68                                  |
| Br <sub>2</sub> -BBQ                                                      | 3.0-4.0                                       | >99 <sup>b</sup>                    |
| Me <sub>2</sub> -BBQ                                                      | 7.0-8.0                                       | 46                                  |
| <i>n</i> Bu <sub>2</sub> -BBQ                                             | >23                                           | 37                                  |
| (OMe) <sub>2</sub> -BBQ                                                   | <1.0                                          | 60                                  |

<sup>a</sup> Ratio of the 20th capacity to the 1st value. <sup>b</sup> The capacity was rapidly decreased at around 25th cycle.

### Experimental method for solubility measurement

R<sub>2</sub>-BBQ (0.5 mg) was added to tetraglyme (0.5 mL), and the mixture was stirred at 20 °C for 5 min. The addition of 0.5 mg R<sub>2</sub>-BBQ and stirring of the mixture were repeated, until undissolved R<sub>2</sub>-BBQ remained after the stirring.

## References

- 1 M. J. Frisch, G. W. Trucks, H. B. Schlegel, G. E. Scuseria, M. A. Robb, J. R. Cheeseman, G. Scalmani, V. Barone, B. Mennucci, G. A. Petersson, H. Nakatsuji, M. Caricato, X. Li, H. P. Hratchian, A. F. Izmaylov, J. Bloino, G. Zheng, J. L. Sonnenberg, M. Hada, M. Ehara, K. Toyota, R. Fukuda, J. Hasegawa, M. Ishida, T. Nakajima, Y. Honda, O. Kitao, H. Nakai, T. Vreven, J. A. Montgomery, Jr., J. E. Peralta, F. Ogliaro, M. Bearpark, J. J. Heyd, E. Brothers, K. N. Kudin, V. N. Staroverov, T. Keith, R. Kobayashi, J. Normand, K. Raghavachari, A. Rendell, J. C. Burant, S. S. Iyengar, J. Tomasi, M. Cossi, N. Rega, J. M. Millam, M. Klene, J. E. Knox, J. B. Cross, V. Bakken, C. Adamo, J. Jaramillo, R. Gomperts, R. E. Stratmann, O. Yazyev, A. J. Austin, R. Cammi, C. Pomelli, J. W. Ochterski, R. L. Martin, K. Morokuma, V. G. Zakrzewski, G. A. Voth, P. Salvador, J. J. Dannenberg, S. Dapprich, A. D. Daniels, O. Farkas, J. B. Foresman, J. V. Ortiz, J. Cioslowski and D. J. Fox, Gaussian 09, Revision C.01, Gaussian, Inc., Wallingford CT, 2010.
- 2 W. J. Hehre, L. Radom, P. V. R. Schleyer and P. A. Pople, *Ab initio Molecular Orbital Theory*, Wiley, New York, 1986.
- 3 R. Dennington, T. Keith and J. Millam, Semichem Inc., Shawnee Mission, KS, 2009.

## <sup>1</sup>H and <sup>13</sup>C NMR of compounds involved in this study

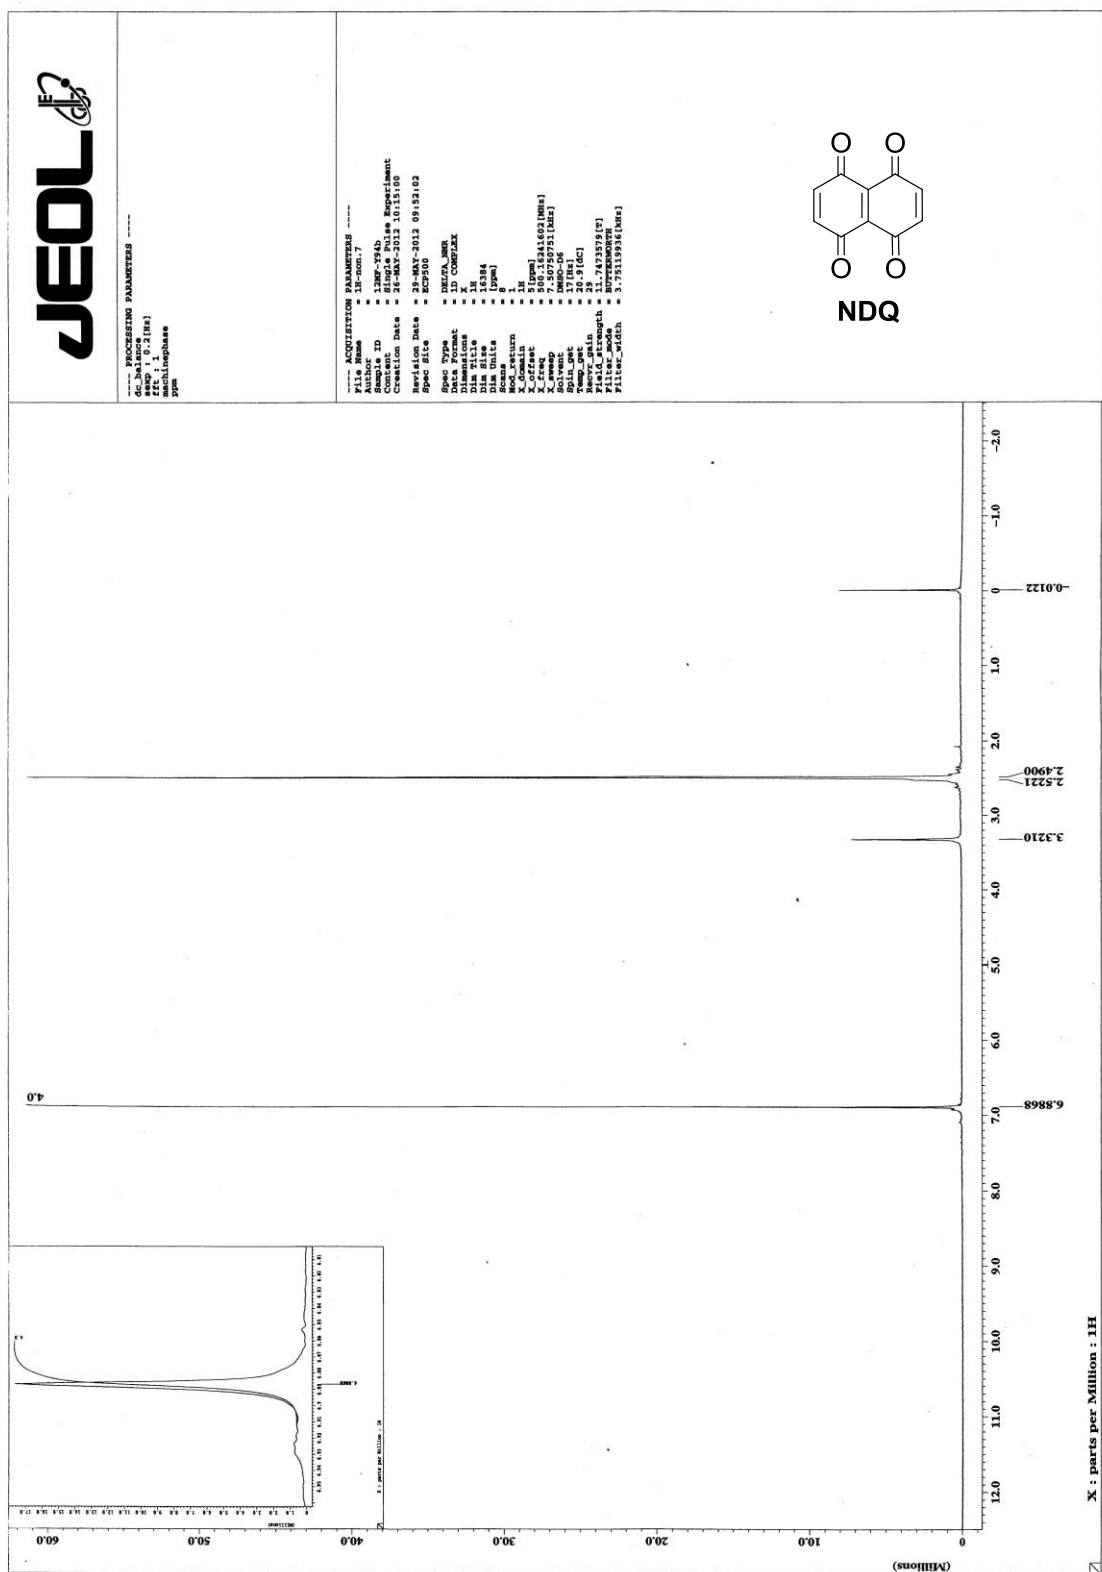





```
----- PROCESSING PARAMETERS -----
dc balance
sexp : 5 [Hz]
fft : 1
pym
machinephase
```

[illegible]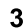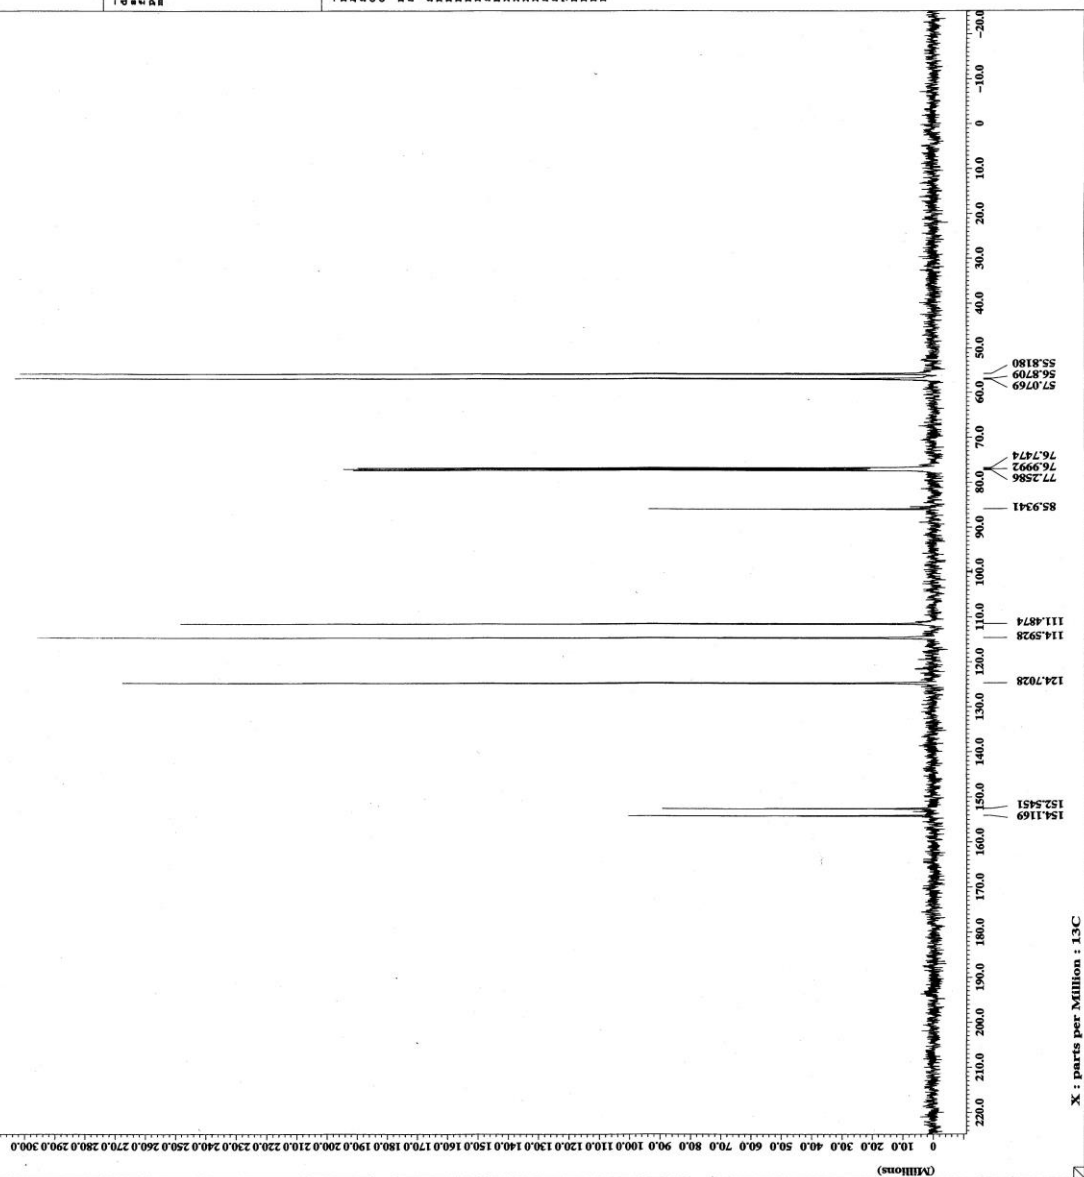



```
----- PROCESSING PARAMETERS -----
dc_balance
ssxp : 5[Hz]
ffit : 1
ppm
machinephase
```

|     |                        |                   |
|-----|------------------------|-------------------|
| 1   | ACQUISITION PARAMETERS |                   |
| 2   | 1. ACQUISITION         |                   |
| 3   | 2. ANALYST             | JA_L.BACCHETTA.39 |
| 4   | 3. ANALYST             |                   |
| 5   | 4. ANALYST             |                   |
| 6   | 5. ANALYST             |                   |
| 7   | 6. ANALYST             |                   |
| 8   | 7. ANALYST             |                   |
| 9   | 8. ANALYST             |                   |
| 10  | 9. ANALYST             |                   |
| 11  | 10. ANALYST            |                   |
| 12  | 11. ANALYST            |                   |
| 13  | 12. ANALYST            |                   |
| 14  | 13. ANALYST            |                   |
| 15  | 14. ANALYST            |                   |
| 16  | 15. ANALYST            |                   |
| 17  | 16. ANALYST            |                   |
| 18  | 17. ANALYST            |                   |
| 19  | 18. ANALYST            |                   |
| 20  | 19. ANALYST            |                   |
| 21  | 20. ANALYST            |                   |
| 22  | 21. ANALYST            |                   |
| 23  | 22. ANALYST            |                   |
| 24  | 23. ANALYST            |                   |
| 25  | 24. ANALYST            |                   |
| 26  | 25. ANALYST            |                   |
| 27  | 26. ANALYST            |                   |
| 28  | 27. ANALYST            |                   |
| 29  | 28. ANALYST            |                   |
| 30  | 29. ANALYST            |                   |
| 31  | 30. ANALYST            |                   |
| 32  | 31. ANALYST            |                   |
| 33  | 32. ANALYST            |                   |
| 34  | 33. ANALYST            |                   |
| 35  | 34. ANALYST            |                   |
| 36  | 35. ANALYST            |                   |
| 37  | 36. ANALYST            |                   |
| 38  | 37. ANALYST            |                   |
| 39  | 38. ANALYST            |                   |
| 40  | 39. ANALYST            |                   |
| 41  | 40. ANALYST            |                   |
| 42  | 41. ANALYST            |                   |
| 43  | 42. ANALYST            |                   |
| 44  | 43. ANALYST            |                   |
| 45  | 44. ANALYST            |                   |
| 46  | 45. ANALYST            |                   |
| 47  | 46. ANALYST            |                   |
| 48  | 47. ANALYST            |                   |
| 49  | 48. ANALYST            |                   |
| 50  | 49. ANALYST            |                   |
| 51  | 50. ANALYST            |                   |
| 52  | 51. ANALYST            |                   |
| 53  | 52. ANALYST            |                   |
| 54  | 53. ANALYST            |                   |
| 55  | 54. ANALYST            |                   |
| 56  | 55. ANALYST            |                   |
| 57  | 56. ANALYST            |                   |
| 58  | 57. ANALYST            |                   |
| 59  | 58. ANALYST            |                   |
| 60  | 59. ANALYST            |                   |
| 61  | 60. ANALYST            |                   |
| 62  | 61. ANALYST            |                   |
| 63  | 62. ANALYST            |                   |
| 64  | 63. ANALYST            |                   |
| 65  | 64. ANALYST            |                   |
| 66  | 65. ANALYST            |                   |
| 67  | 66. ANALYST            |                   |
| 68  | 67. ANALYST            |                   |
| 69  | 68. ANALYST            |                   |
| 70  | 69. ANALYST            |                   |
| 71  | 70. ANALYST            |                   |
| 72  | 71. ANALYST            |                   |
| 73  | 72. ANALYST            |                   |
| 74  | 73. ANALYST            |                   |
| 75  | 74. ANALYST            |                   |
| 76  | 75. ANALYST            |                   |
| 77  | 76. ANALYST            |                   |
| 78  | 77. ANALYST            |                   |
| 79  | 78. ANALYST            |                   |
| 80  | 79. ANALYST            |                   |
| 81  | 80. ANALYST            |                   |
| 82  | 81. ANALYST            |                   |
| 83  | 82. ANALYST            |                   |
| 84  | 83. ANALYST            |                   |
| 85  | 84. ANALYST            |                   |
| 86  | 85. ANALYST            |                   |
| 87  | 86. ANALYST            |                   |
| 88  | 87. ANALYST            |                   |
| 89  | 88. ANALYST            |                   |
| 90  | 89. ANALYST            |                   |
| 91  | 90. ANALYST            |                   |
| 92  | 91. ANALYST            |                   |
| 93  | 92. ANALYST            |                   |
| 94  | 93. ANALYST            |                   |
| 95  | 94. ANALYST            |                   |
| 96  | 95. ANALYST            |                   |
| 97  | 96. ANALYST            |                   |
| 98  | 97. ANALYST            |                   |
| 99  | 98. ANALYST            |                   |
| 100 | 99. ANALYST            |                   |
| 101 | 100. ANALYST           |                   |
| 102 | 101. ANALYST           |                   |
| 103 | 102. ANALYST           |                   |
| 104 | 103. ANALYST           |                   |
| 105 | 104. ANALYST           |                   |
| 106 | 105. ANALYST           |                   |
| 107 | 106. ANALYST           |                   |
| 108 | 107. ANALYST           |                   |
| 109 | 108. ANALYST           |                   |
| 110 | 109. ANALYST           |                   |
| 111 | 110. ANALYST           |                   |
| 112 | 111. ANALYST           |                   |
| 113 | 112. ANALYST           |                   |
| 114 | 113. ANALYST           |                   |
| 115 | 114. ANALYST           |                   |
| 116 | 115. ANALYST           |                   |
| 117 | 116. ANALYST           |                   |
| 118 | 117. ANALYST           |                   |
| 119 | 118. ANALYST           |                   |
| 120 | 119. ANALYST           |                   |
| 121 | 120. ANALYST           |                   |
| 122 | 121. ANALYST           |                   |
| 123 | 122. ANALYST           |                   |
| 124 | 123. ANALYST           |                   |
| 125 | 124. ANALYST           |                   |
| 126 | 125. ANALYST           |                   |
| 127 | 126. ANALYST           |                   |
| 128 | 127. ANALYST           |                   |
| 129 | 128. ANALYST           |                   |
| 130 | 129. ANALYST           |                   |
| 131 | 130. ANALYST           |                   |
| 132 | 131. ANALYST           |                   |
| 133 | 132. ANALYST           |                   |
| 134 | 133. ANALYST           |                   |
| 135 | 134. ANALYST           |                   |
| 136 | 135. ANALYST           |                   |
| 137 | 136. ANALYST           |                   |
| 138 | 137. ANALYST           |                   |
| 139 | 138. ANALYST           |                   |
| 140 | 139. ANALYST           |                   |
| 141 | 140. ANALYST           |                   |
| 142 | 141. ANALYST           |                   |
| 143 | 142. ANALYST           |                   |
| 144 | 143. ANALYST           |                   |
| 145 | 144. ANALYST           |                   |
| 146 | 145. ANALYST           |                   |
| 147 | 146. ANALYST           |                   |
| 148 | 147. ANALYST           |                   |
|     |                        |                   |

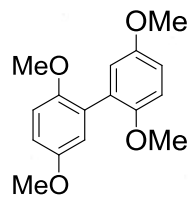

4

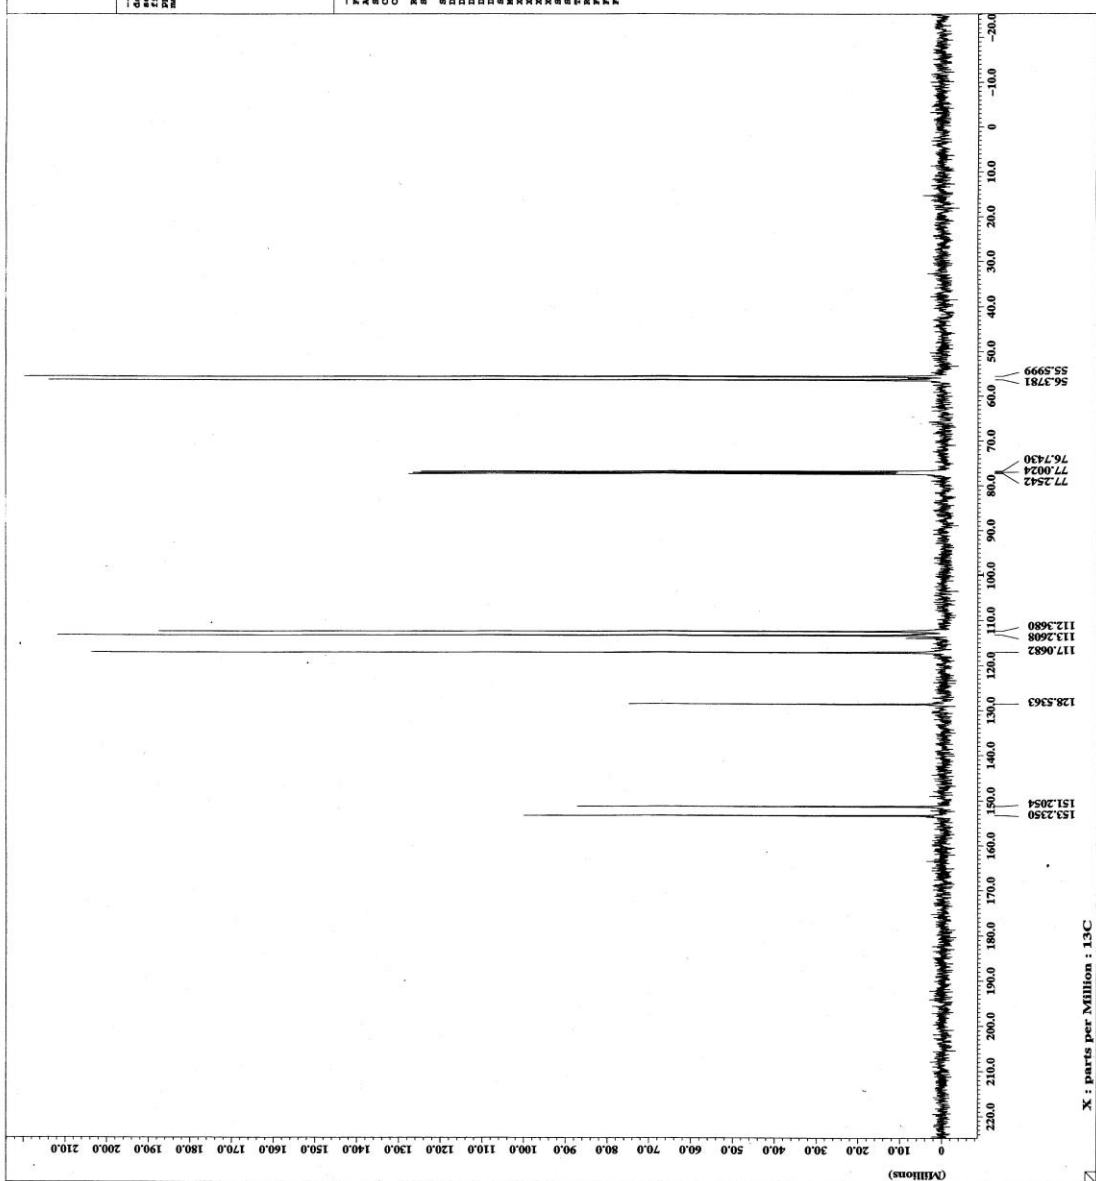





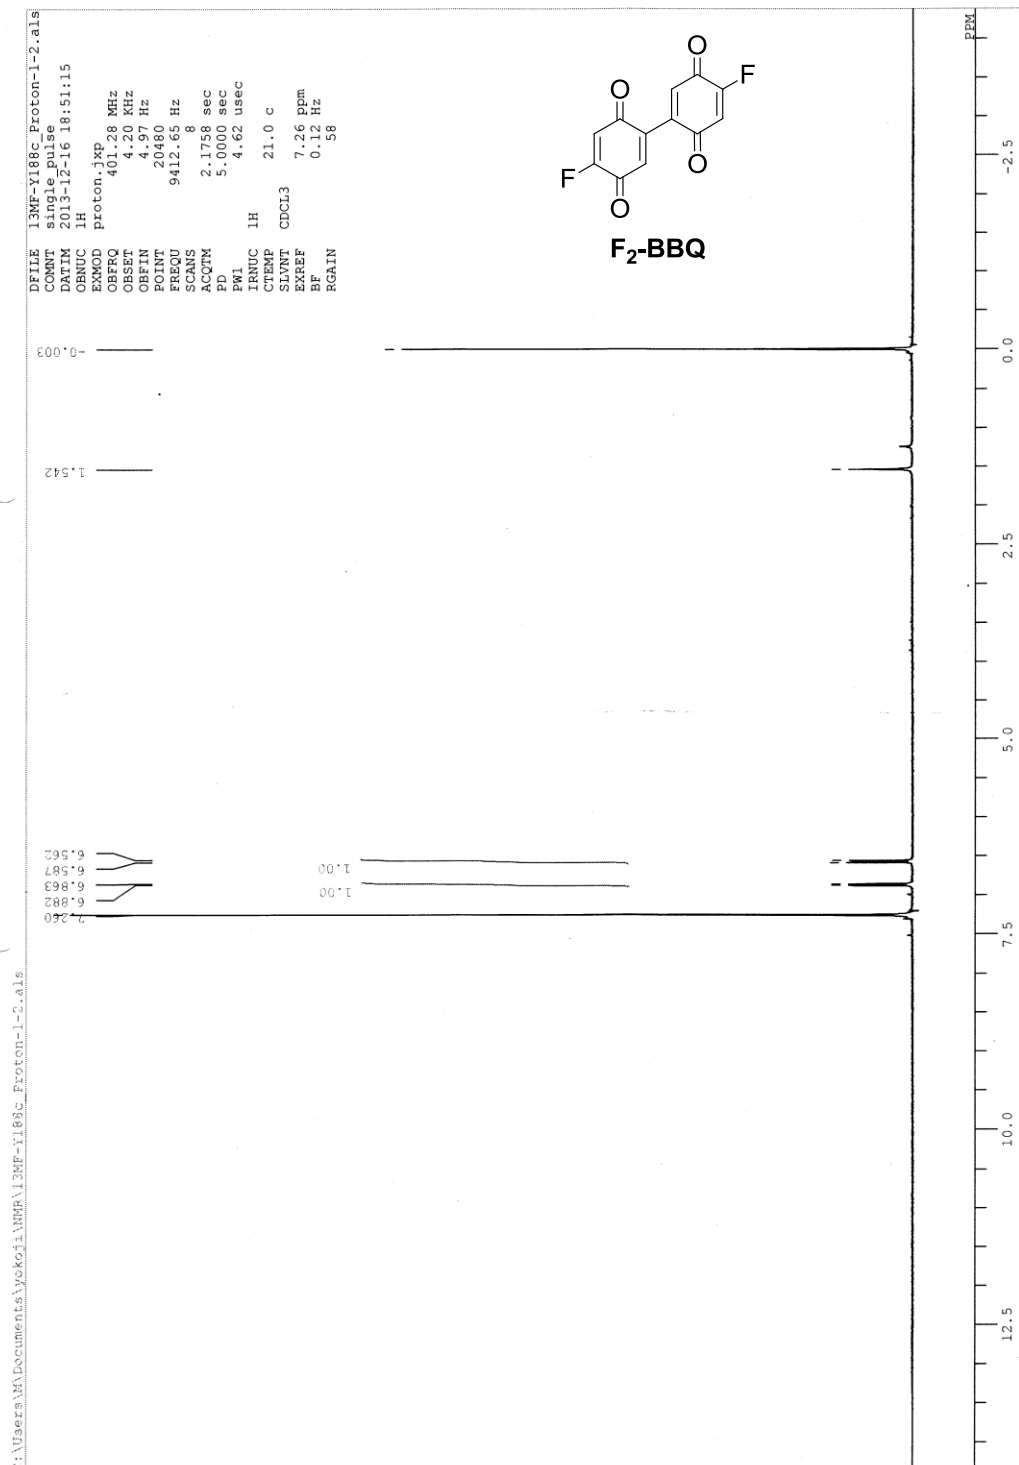

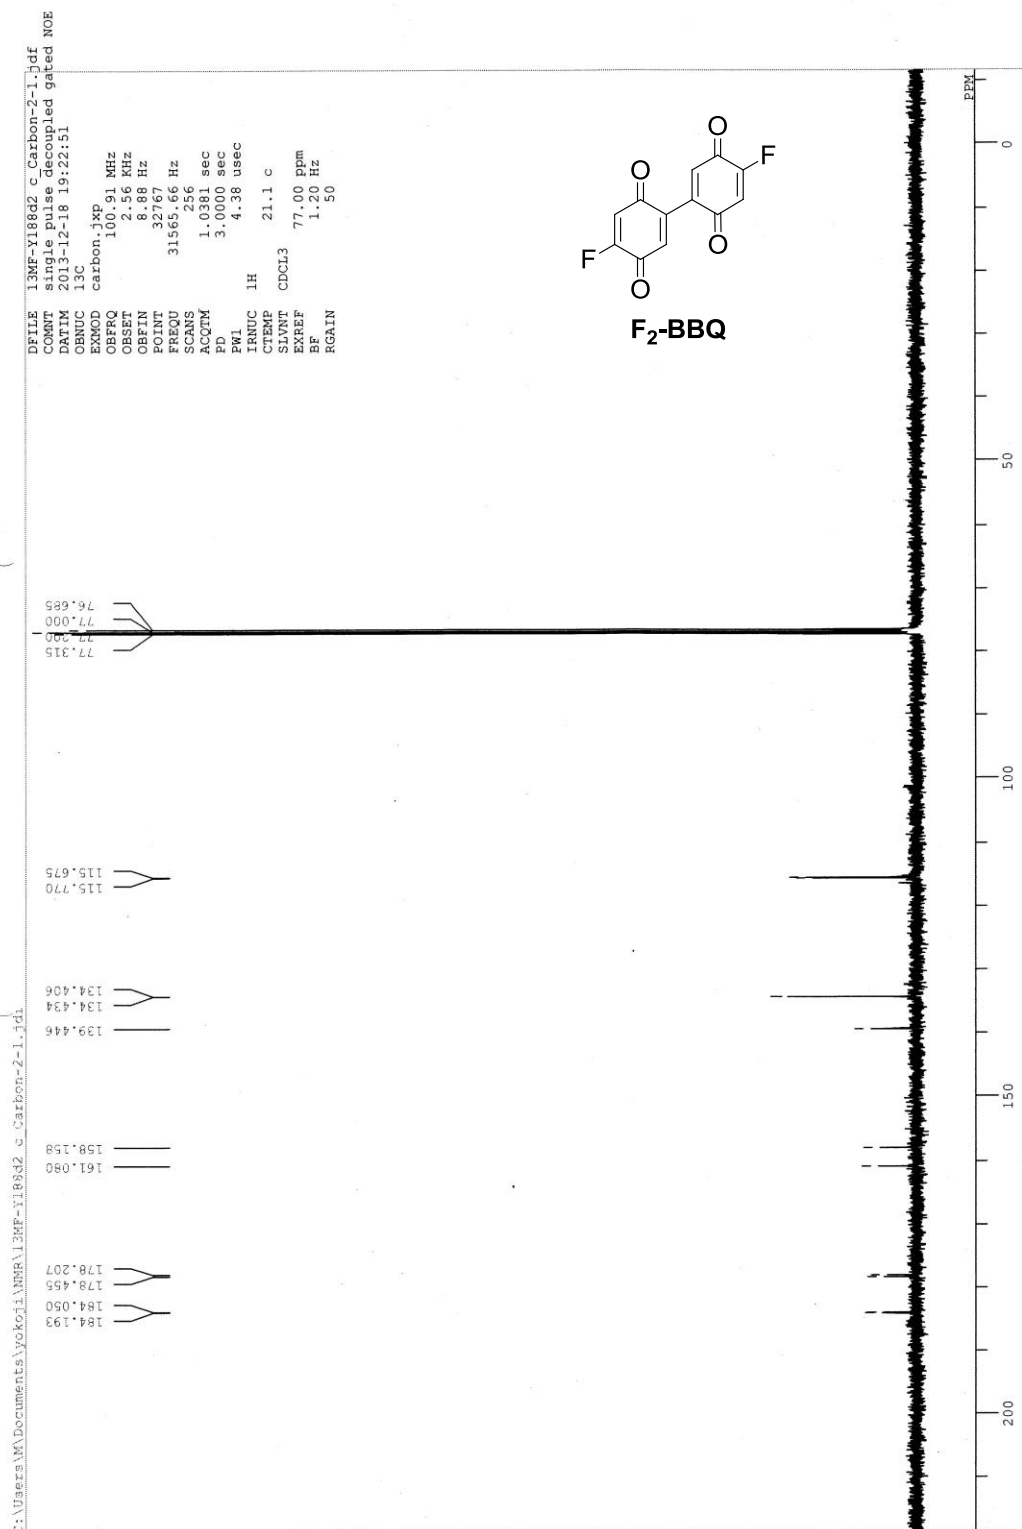

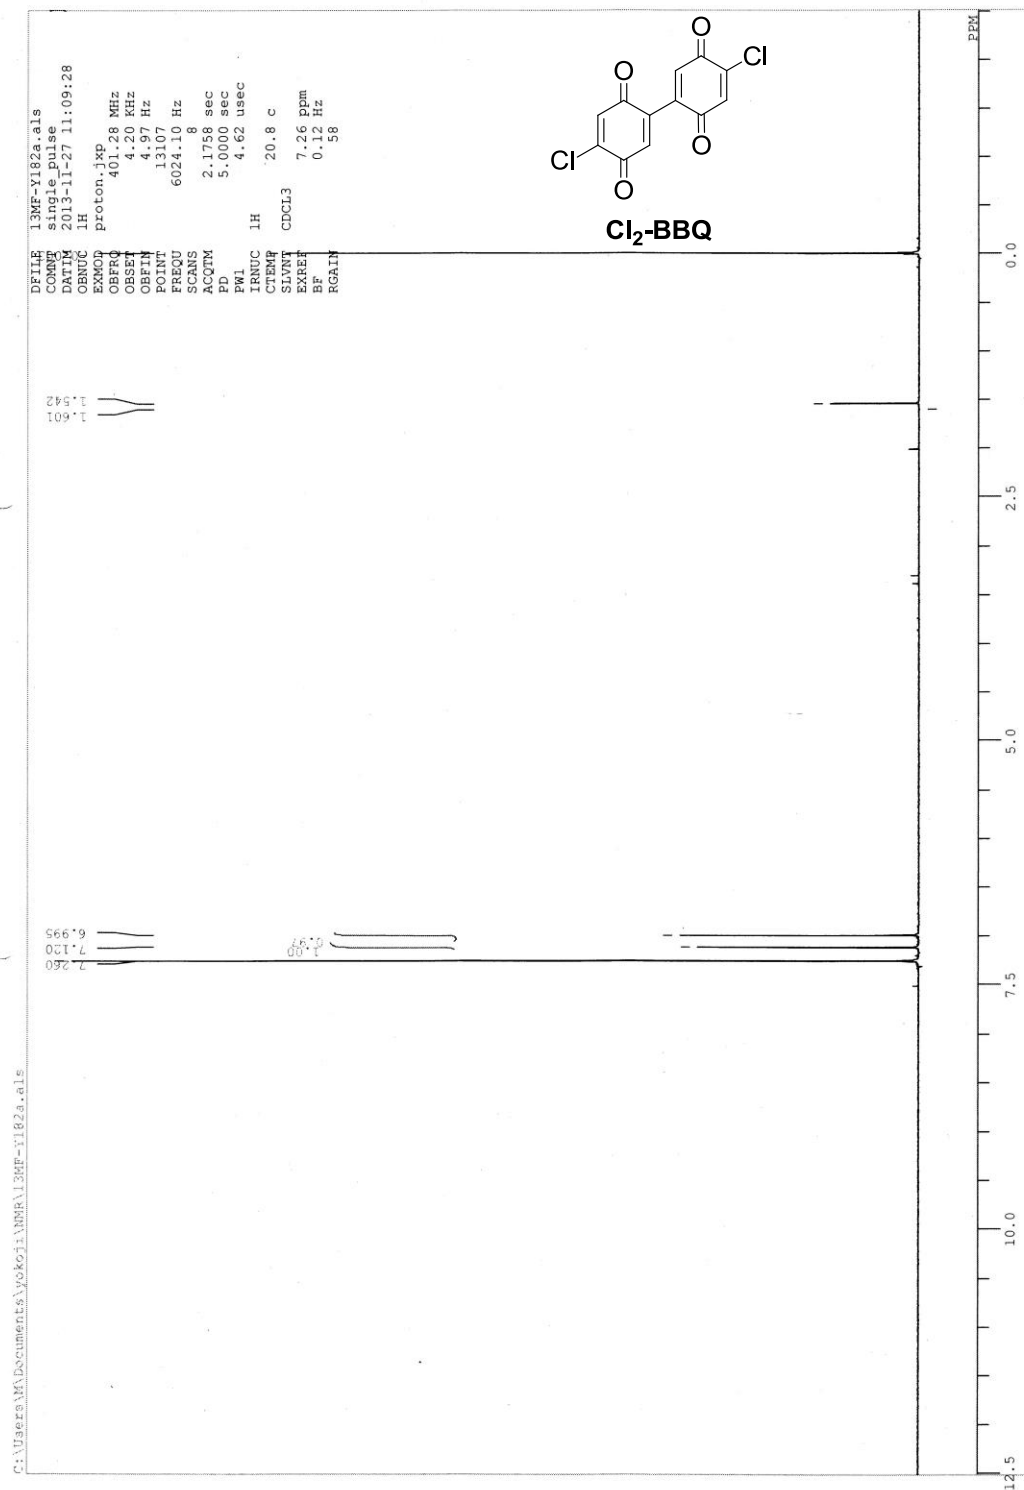

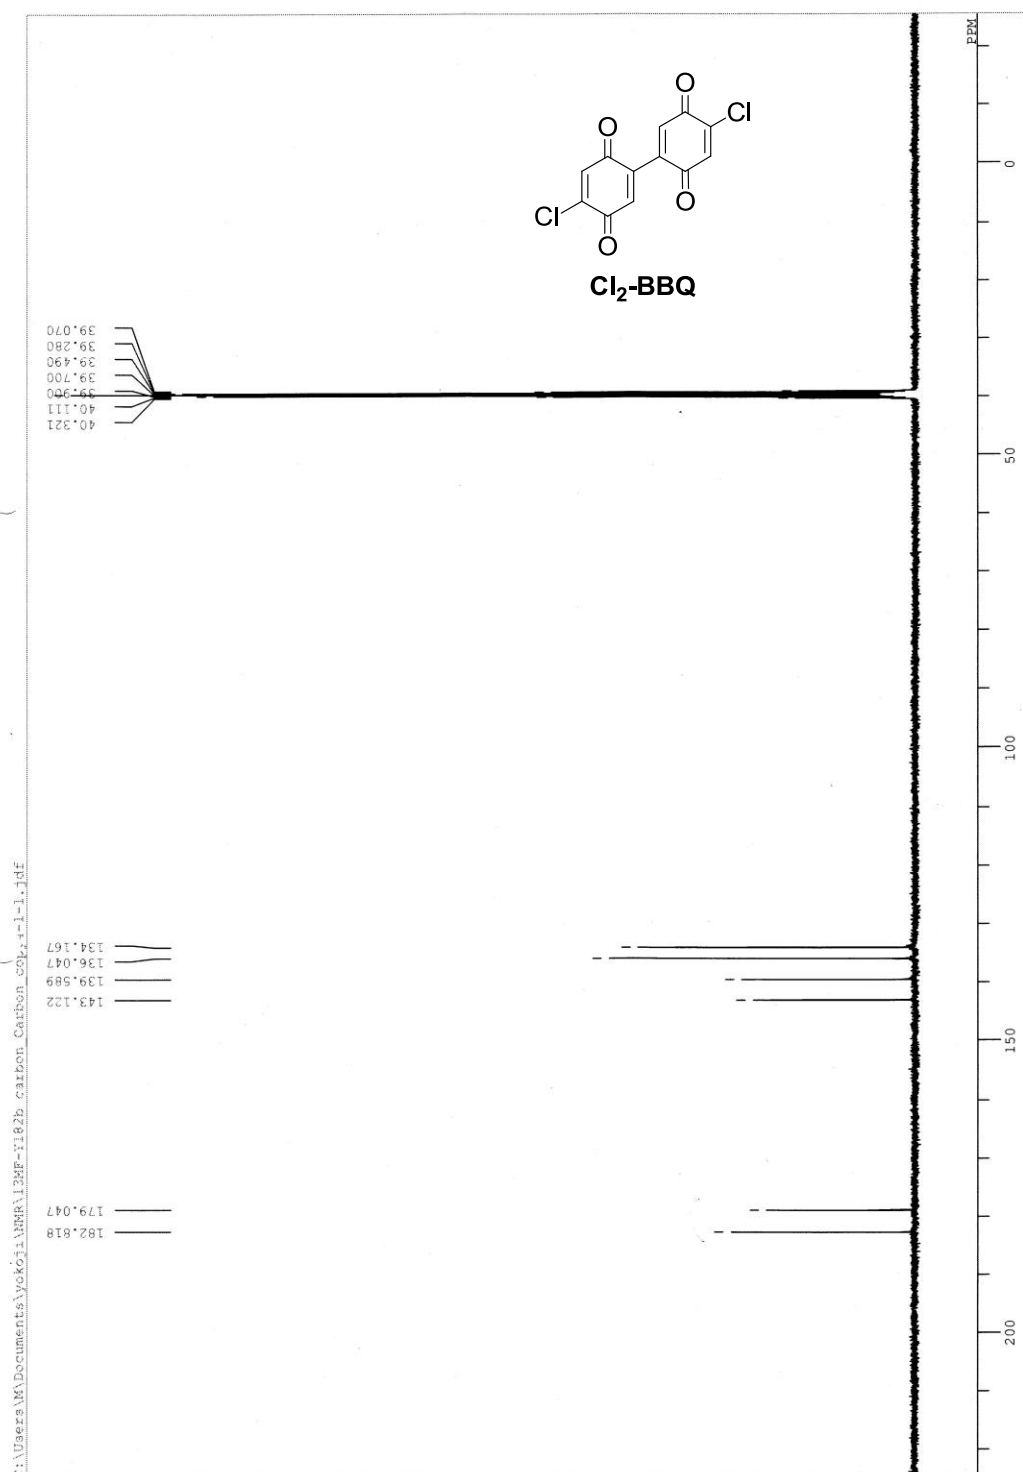

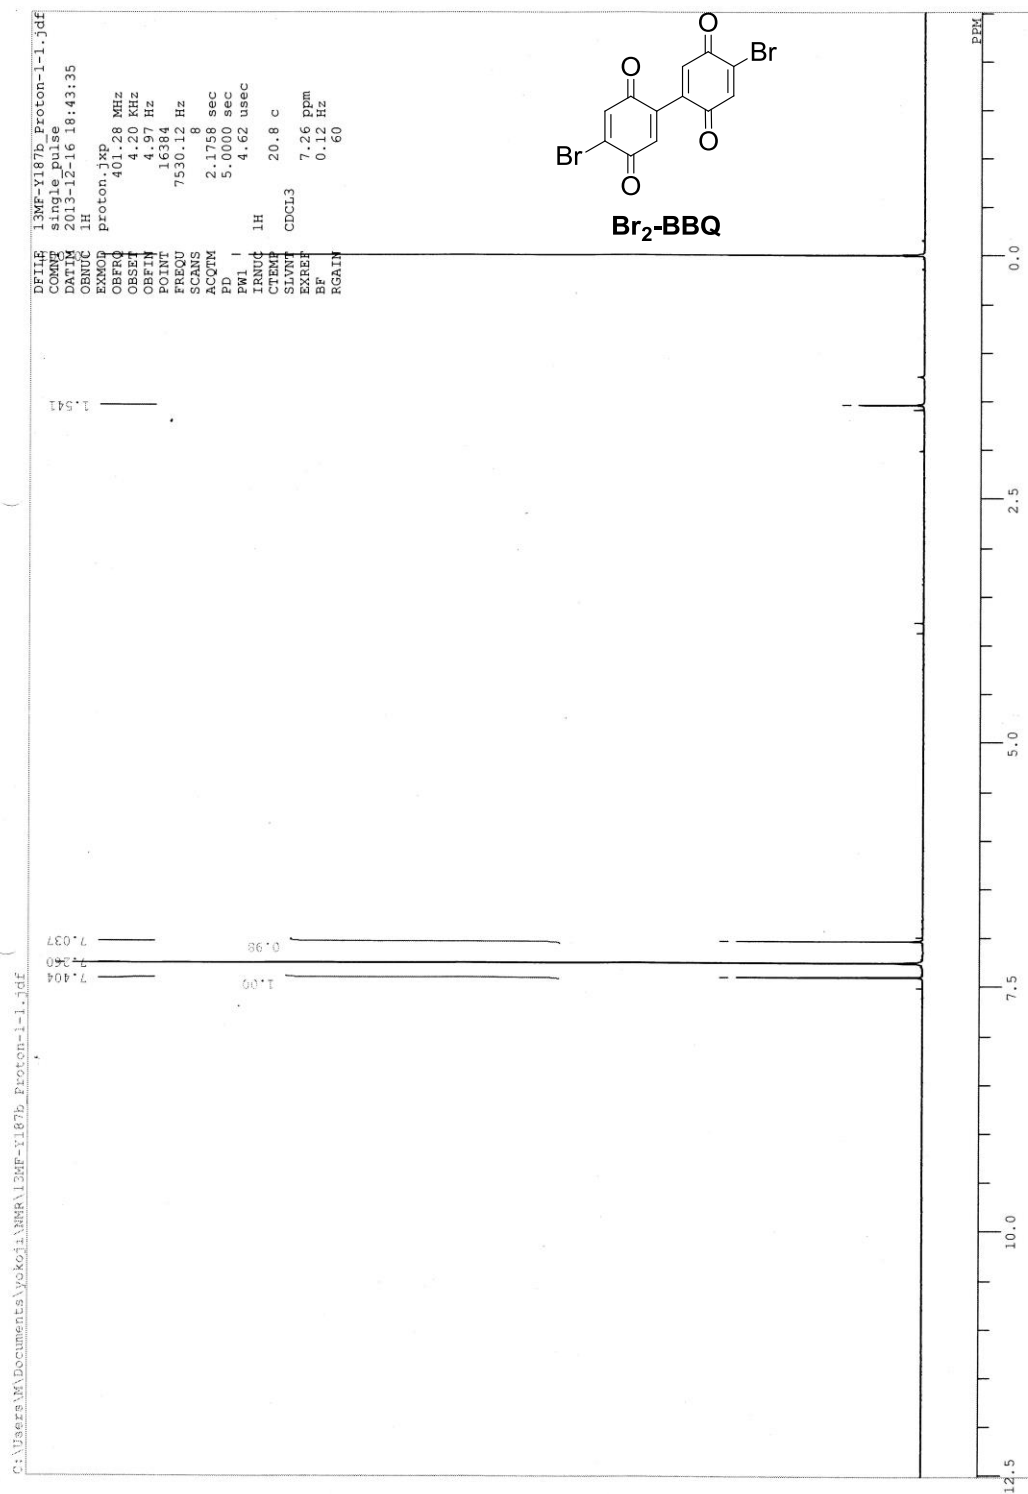

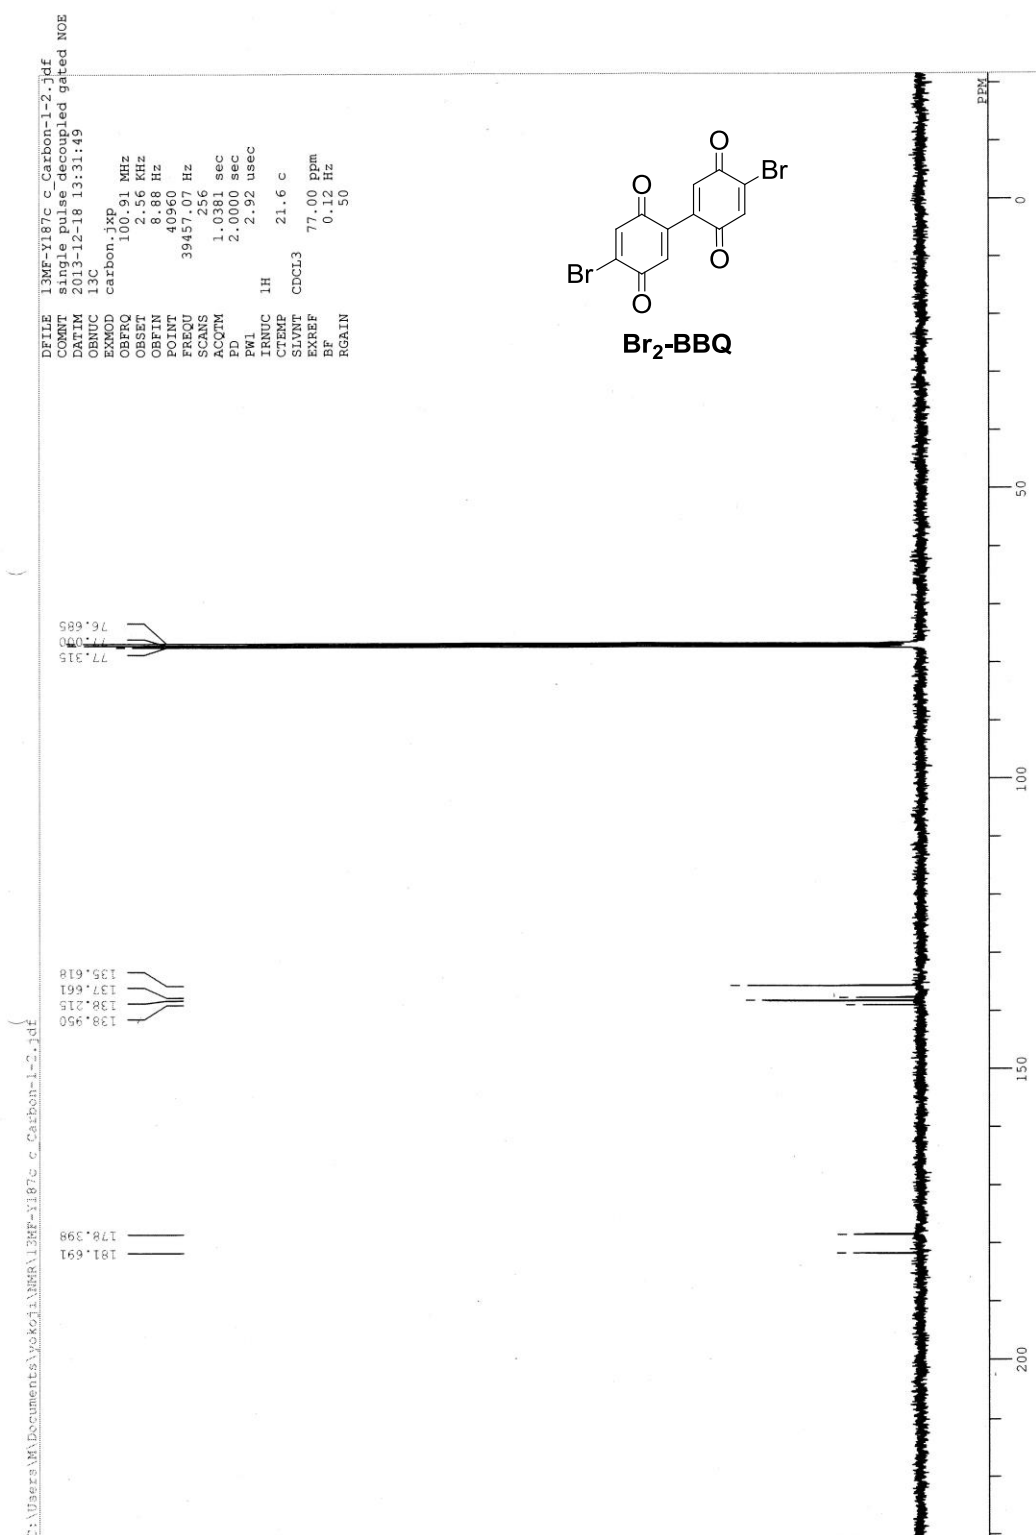

C:\Users\A\Documents\kame\YK13-17a Proton-1-1.jdf

DFILE YK13-17a Proton-1-1.jdf

COMNT single pulse

DATEIM 2013-11-12 14:47:23

ORNUC 1H

EXMOD proton.jxp

OBFRQ 401.28 MHz

OBSEI 4.20 KHz

OBFIN 4.97 Hz

POINT 16384

FREQU 7530.12 Hz

SCANS 2

ACQTM 2.1758 sec

PRG 5.0000 sec

PRG 4.62 usec

INUC 1H

CHMP 21.5 C

SOLVT CDCL3

EXREF 7.26 ppm

BF 0.12 Hz

RGAIN 56

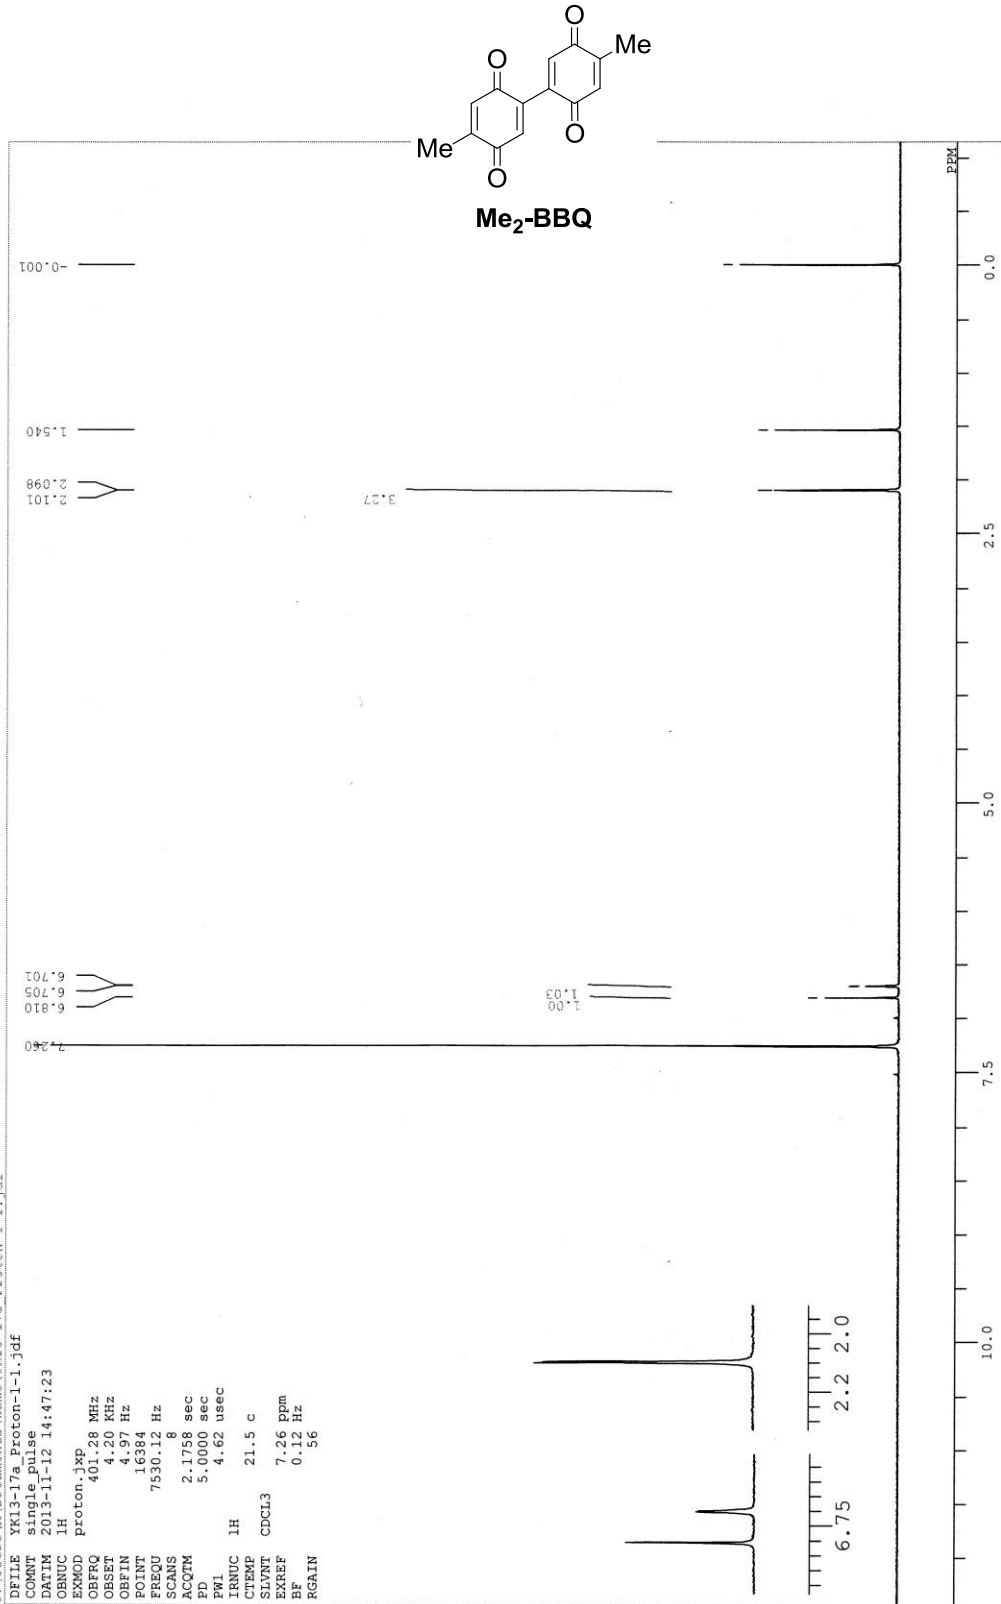

C:\Users\A\Documents\kame\YK-Me2-BBQ\_Carbon-1-1.jdf

```

DEFILE YK-Me2-BBQ_Carbon-1-1.jdf
COMNT single pulse decoupled gated NOE
DATIM 2014-01-20 18:20:35
ORNUC 13C
EXMOD carbon-1xp
ORFQ 100.91 MHz
ORSET 2.56 KHz
ORFIN 8.88 Hz
POINT 32767
FREQU 31565.66 Hz
SCANS 258
ACQTM 1.0381 sec
PD 2.0000 sec
PW1 2.92 usec
IRNUC 1H
CTEMP 20.8 c
SIVNT CDCL3
EXREF 77.00 ppm
BF 1.20 Hz
RGAIN 50
  
```

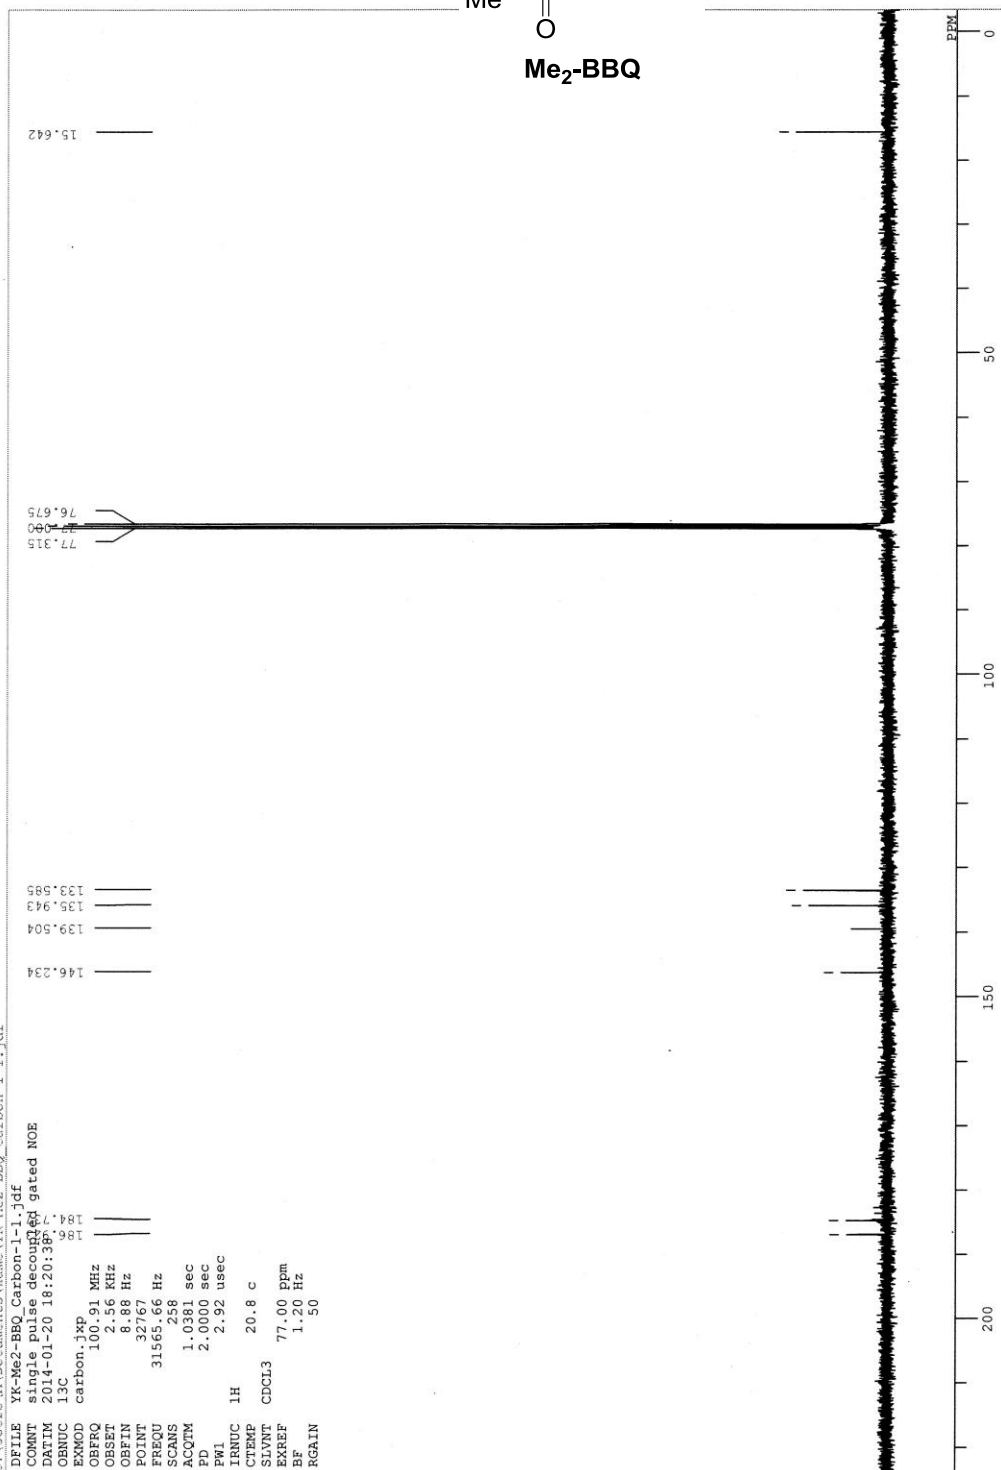

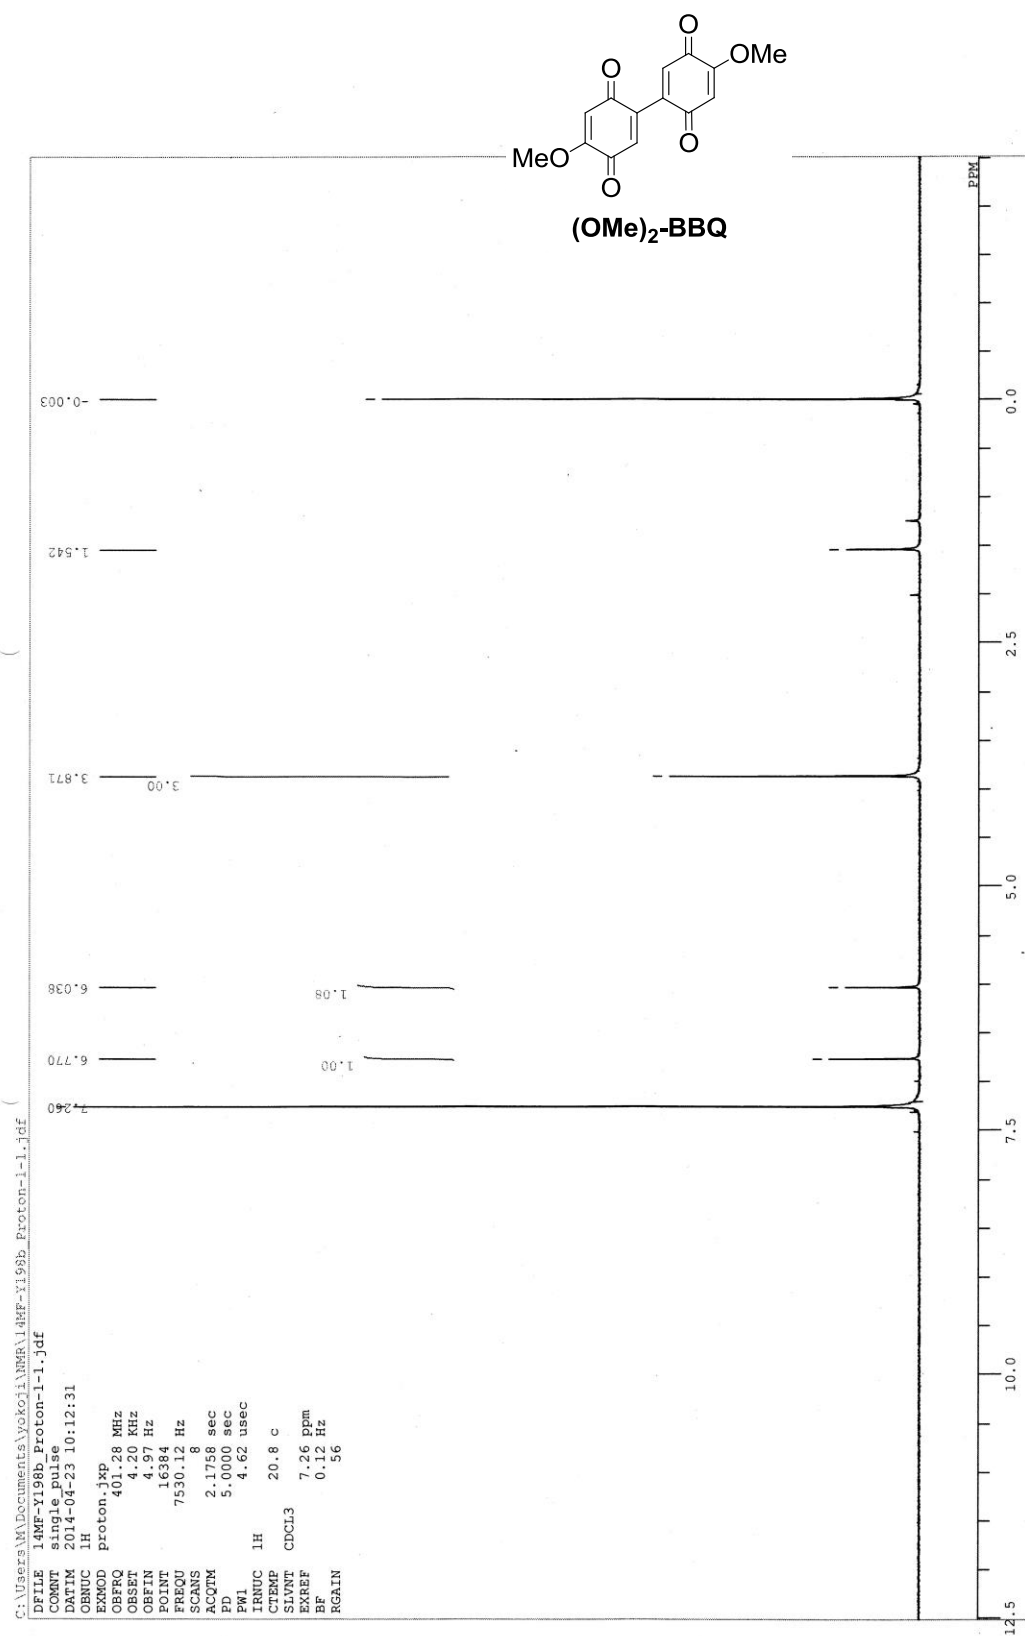



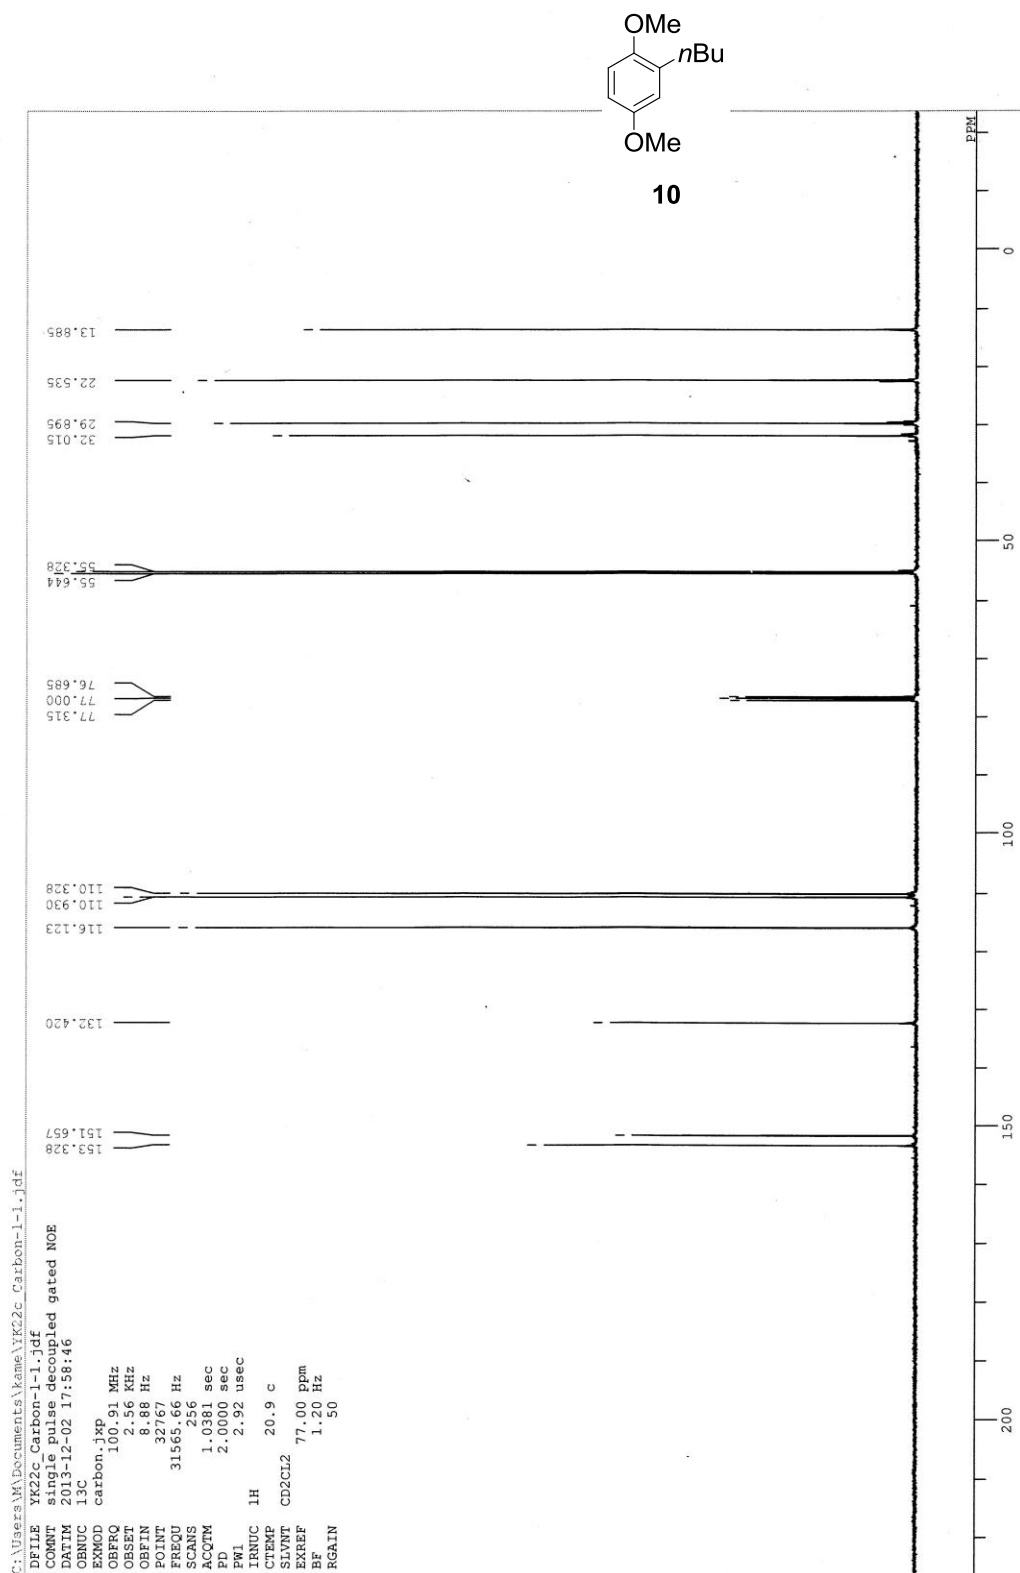

C:\Users\A\Documents\kame\13-YK24a Proton-1-2.jdf

DRUE 13-YK24a Proton-1-2.jdf

COMT single pulse

DATE 2013-12-04 13:24:14

ORUC 1H

EXMOD proton.jxp

ORFQ 401.28 MHz

ORSEI 4.20 KHz

ORFIN 4.57 Hz

ORINT 20480 Hz

FEQU 9412.65 Hz

SCANS 1024

ACQTM 2.1758 sec

PRG 5.0000 sec

IRUC 4.62 usec

TEMP 20.7 C

SVMT CDCL3

EXREF 7.26 ppm

BF 1.20 Hz

RGAIN 56

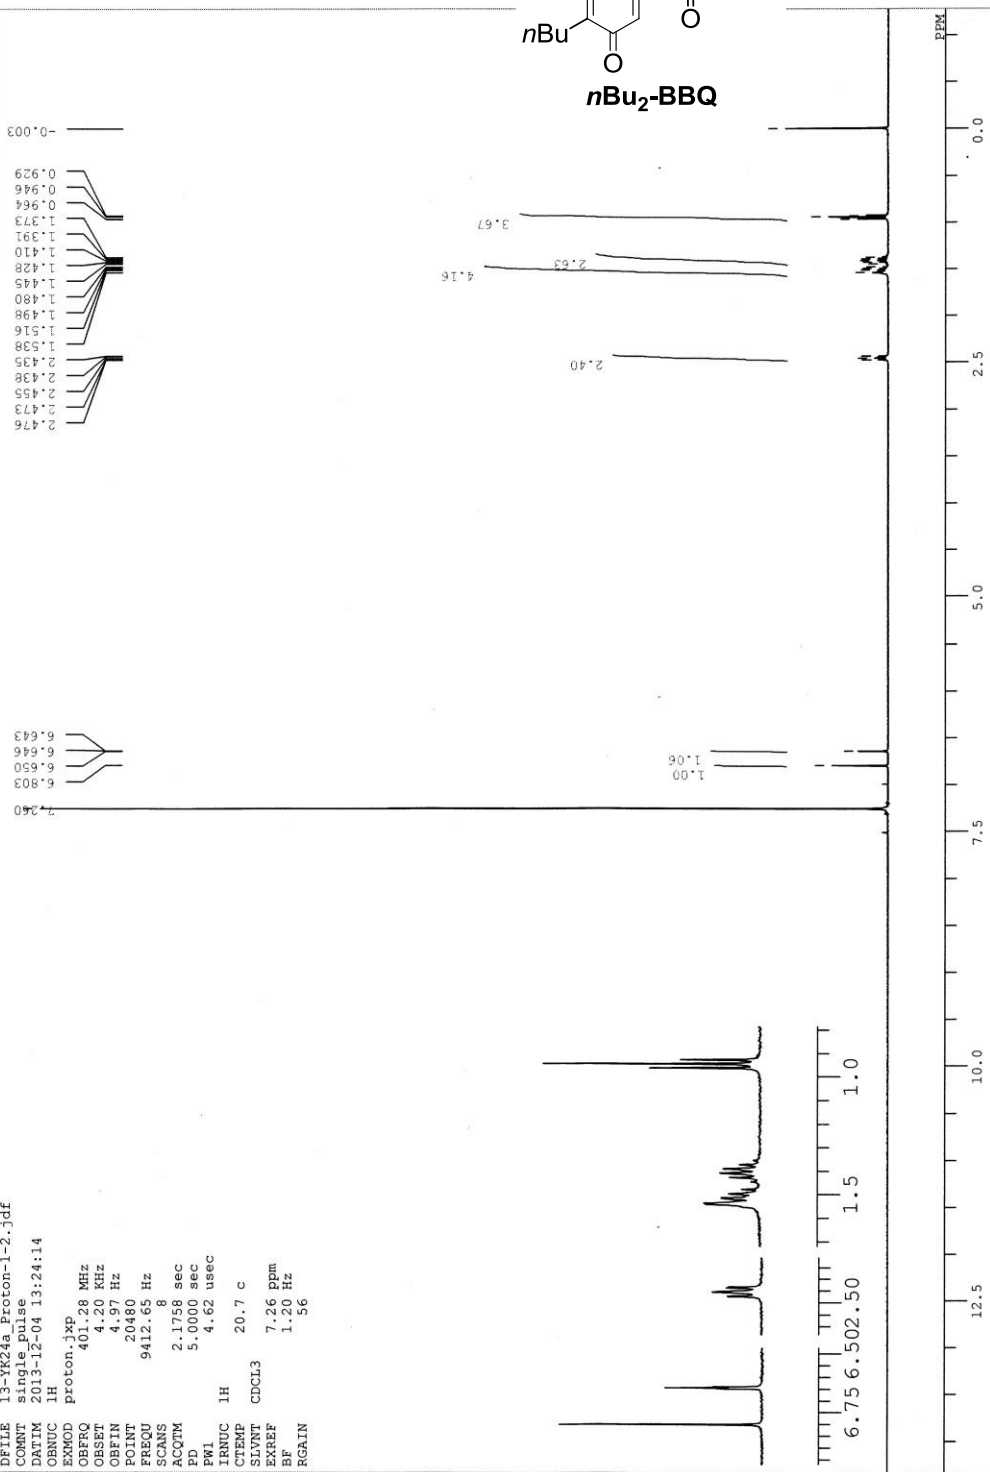

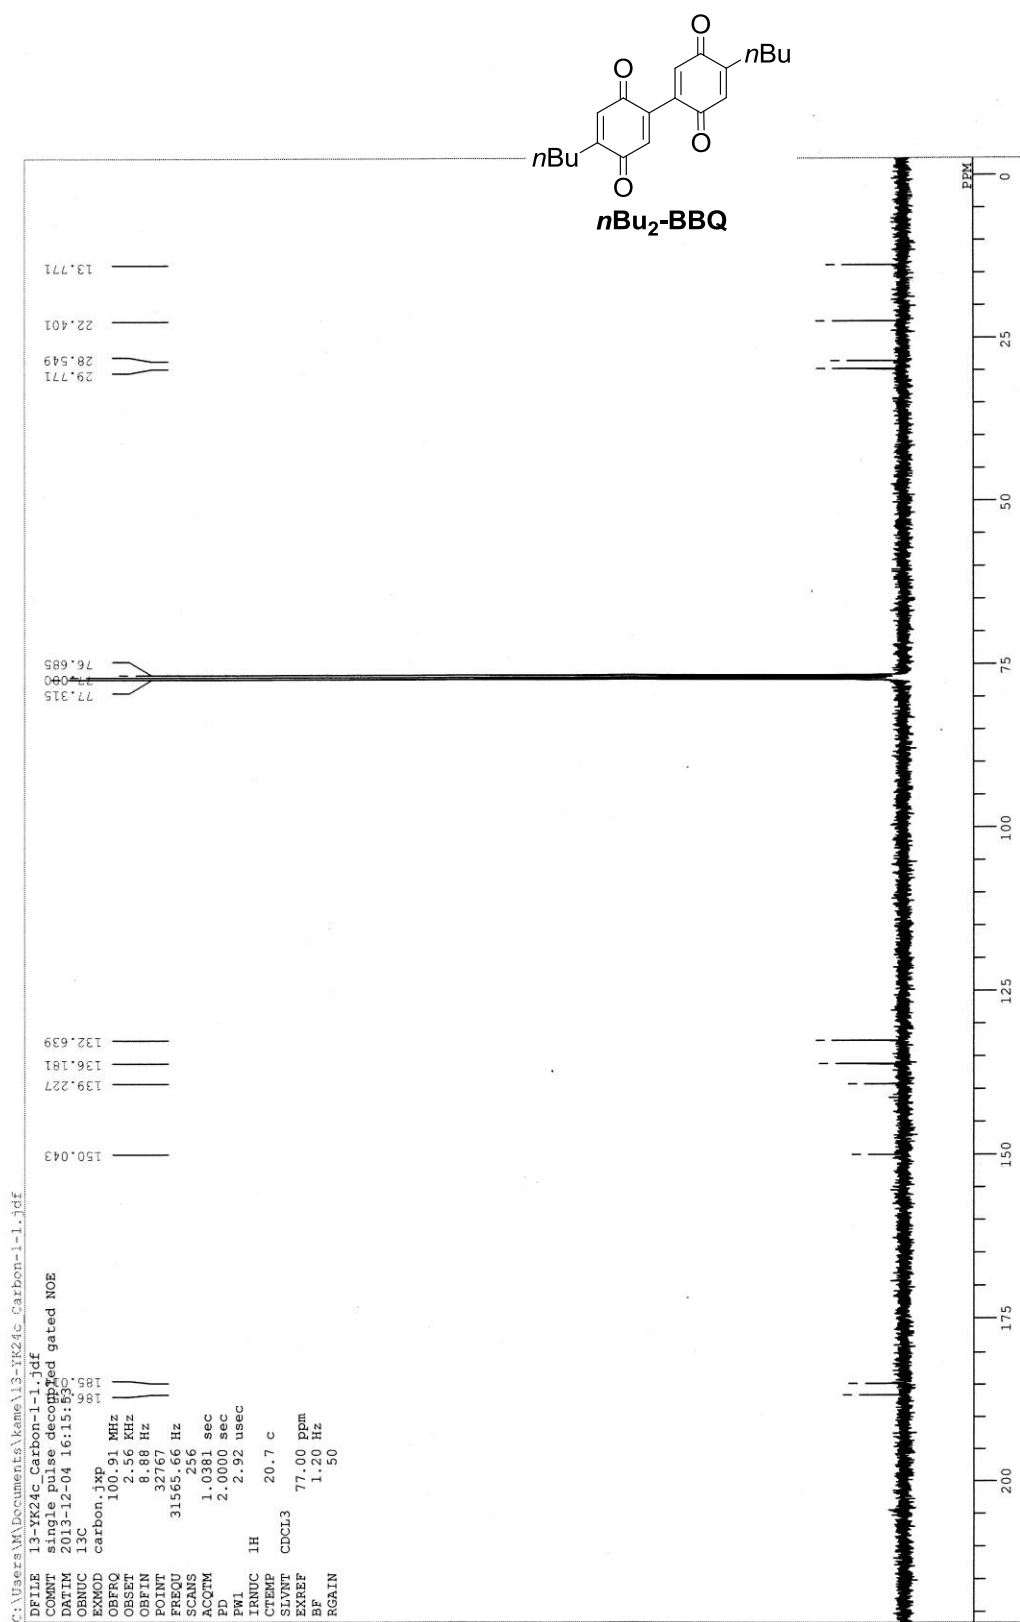

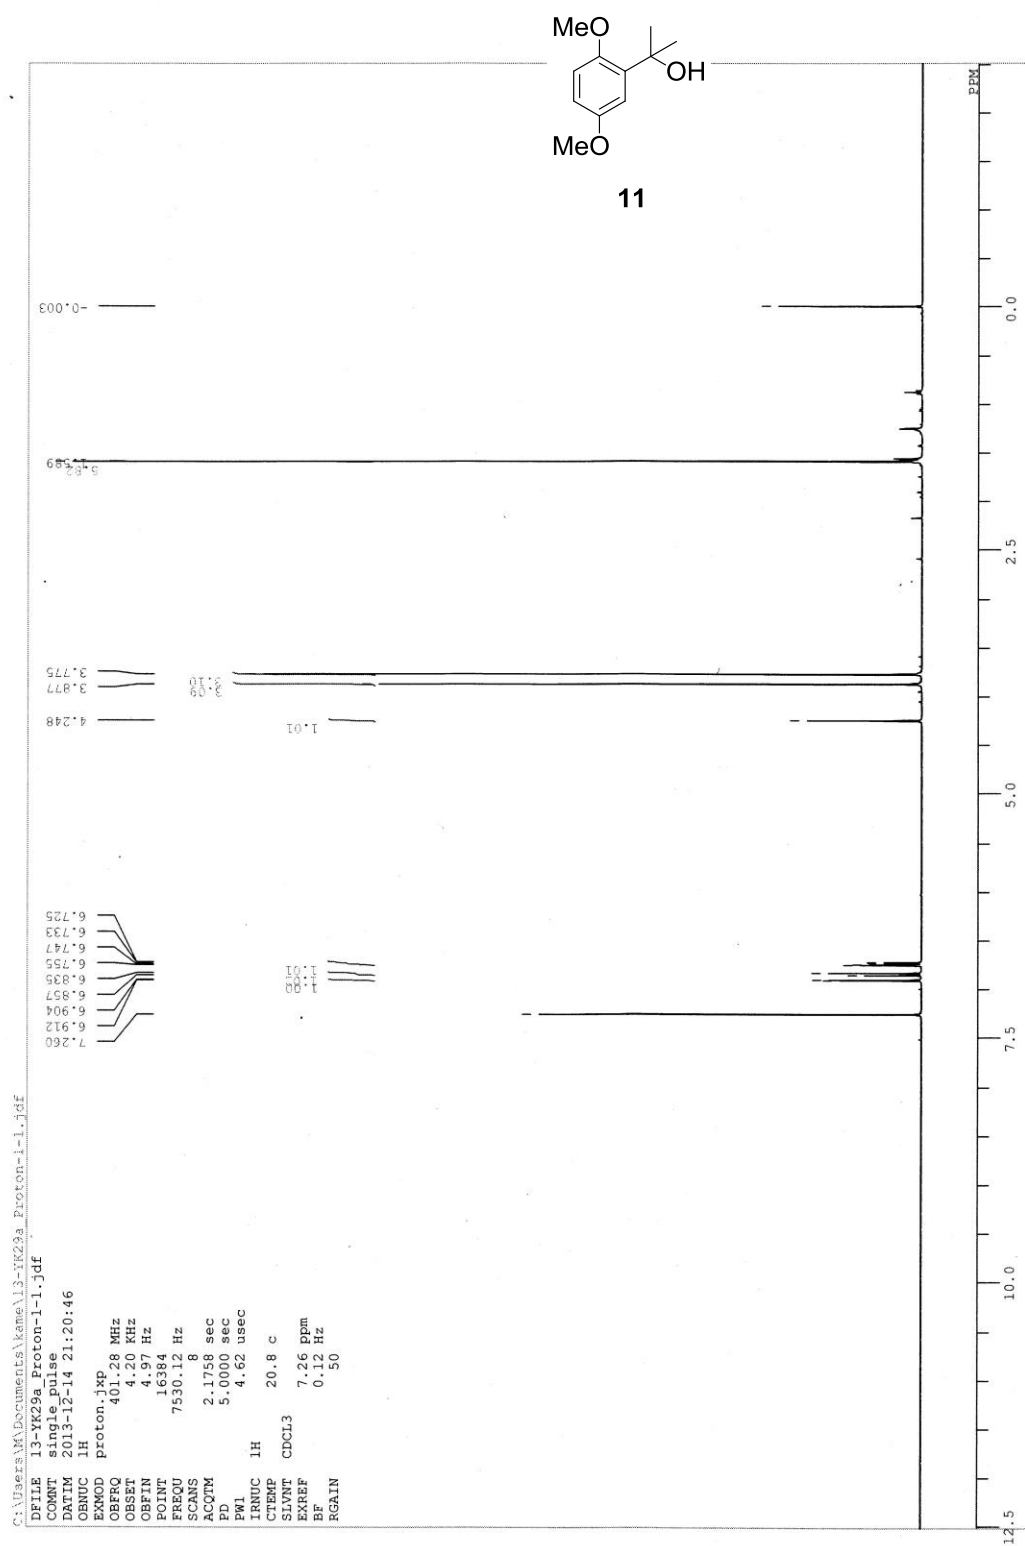

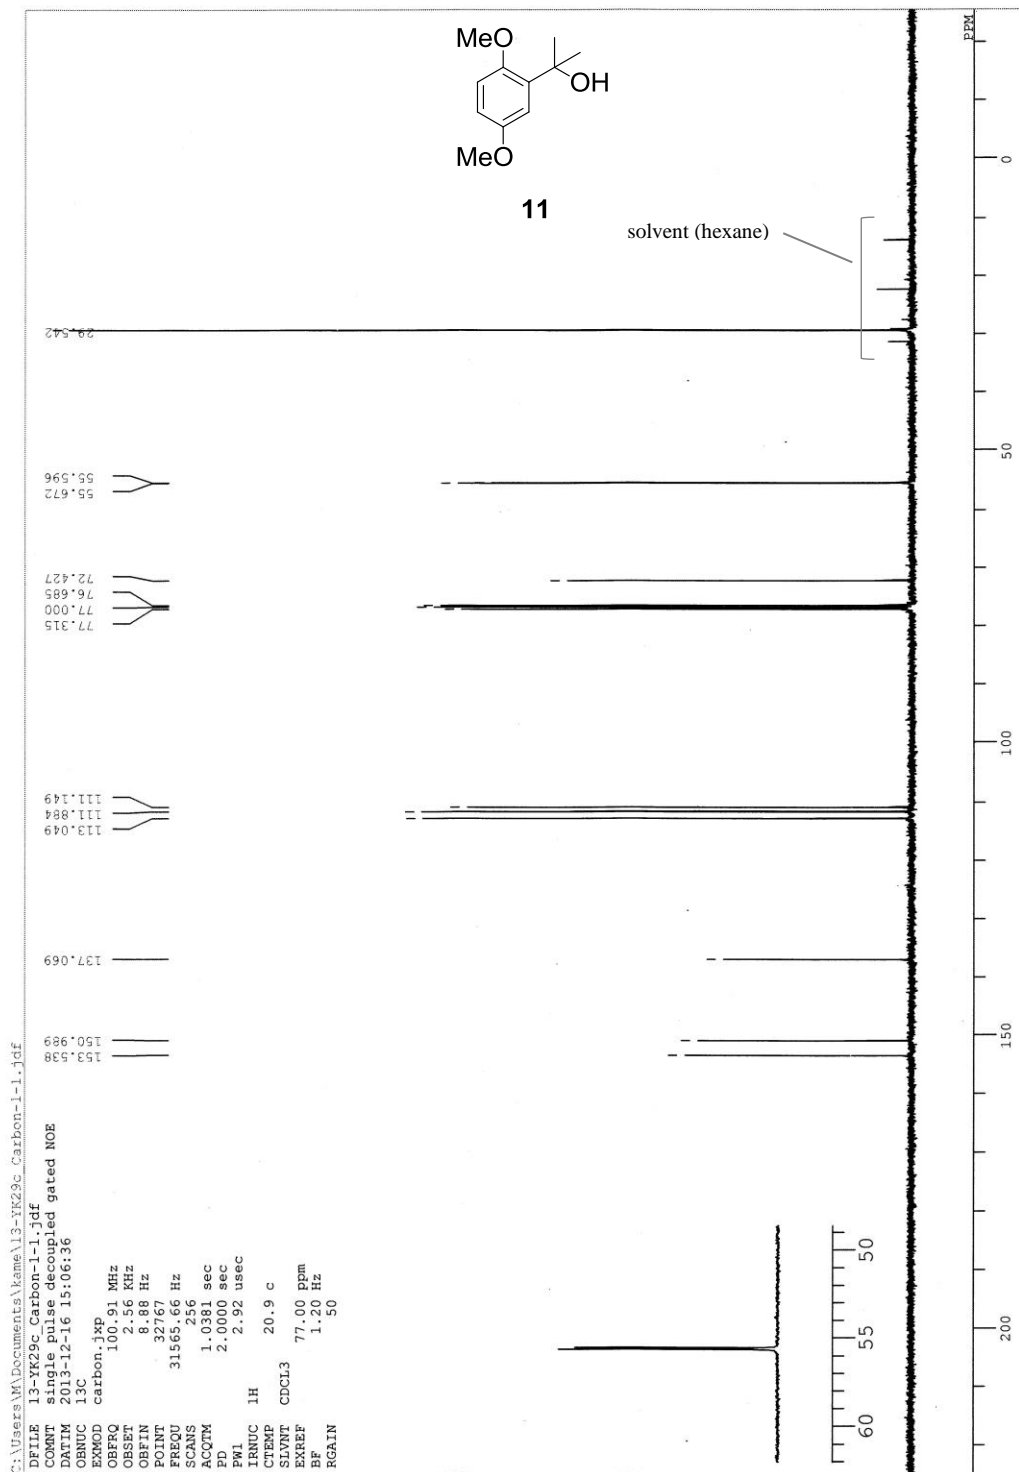

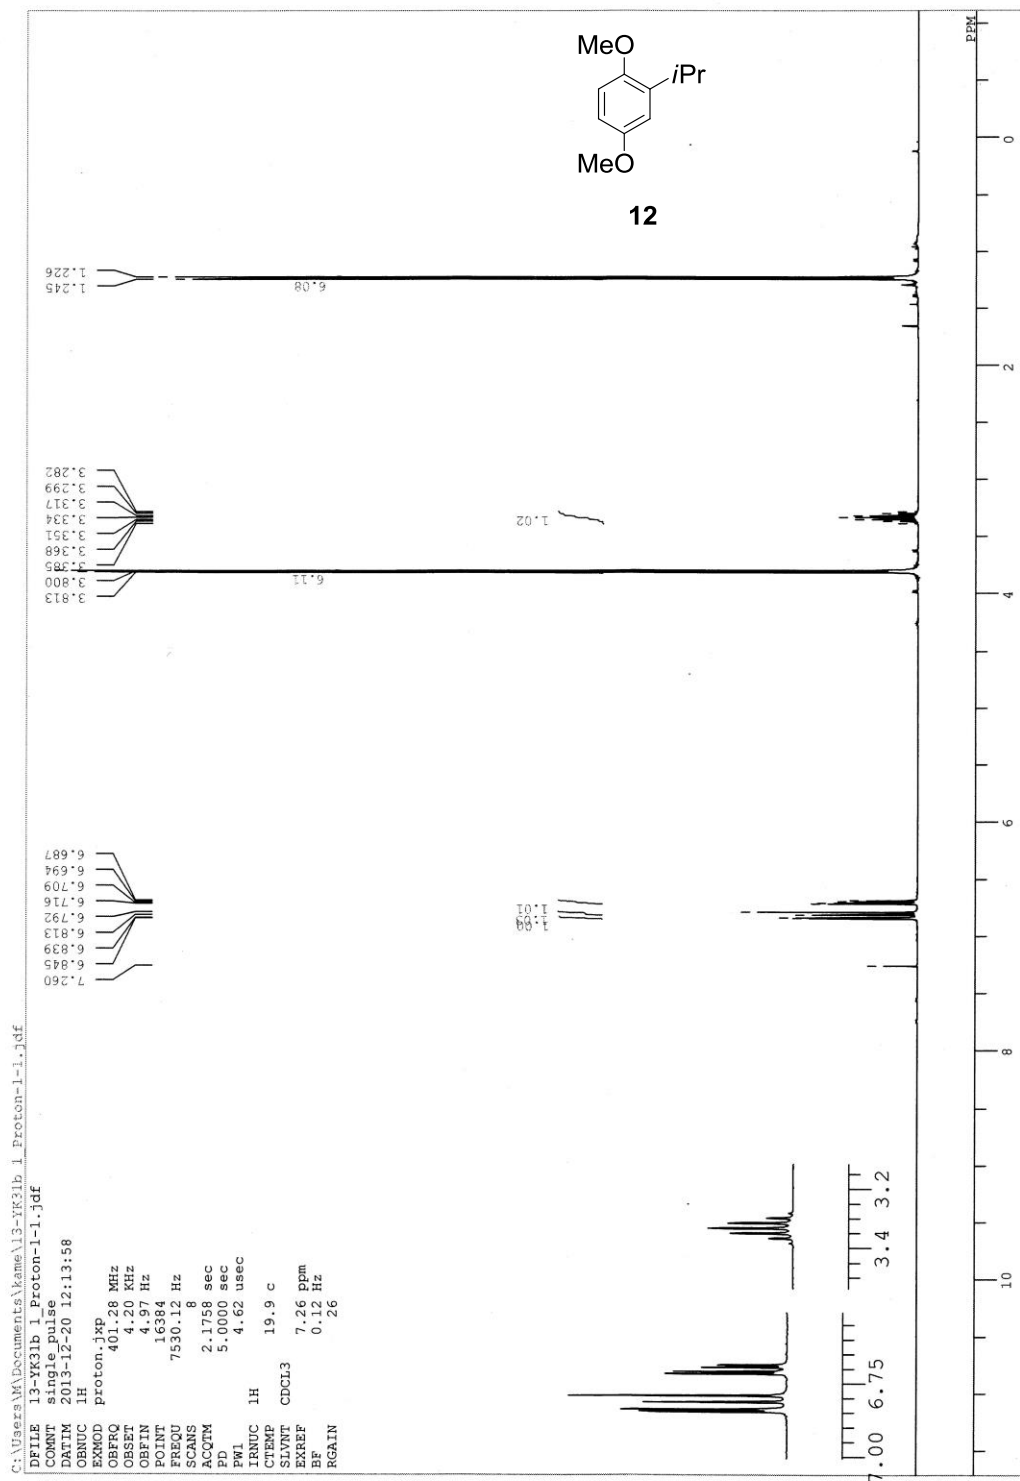

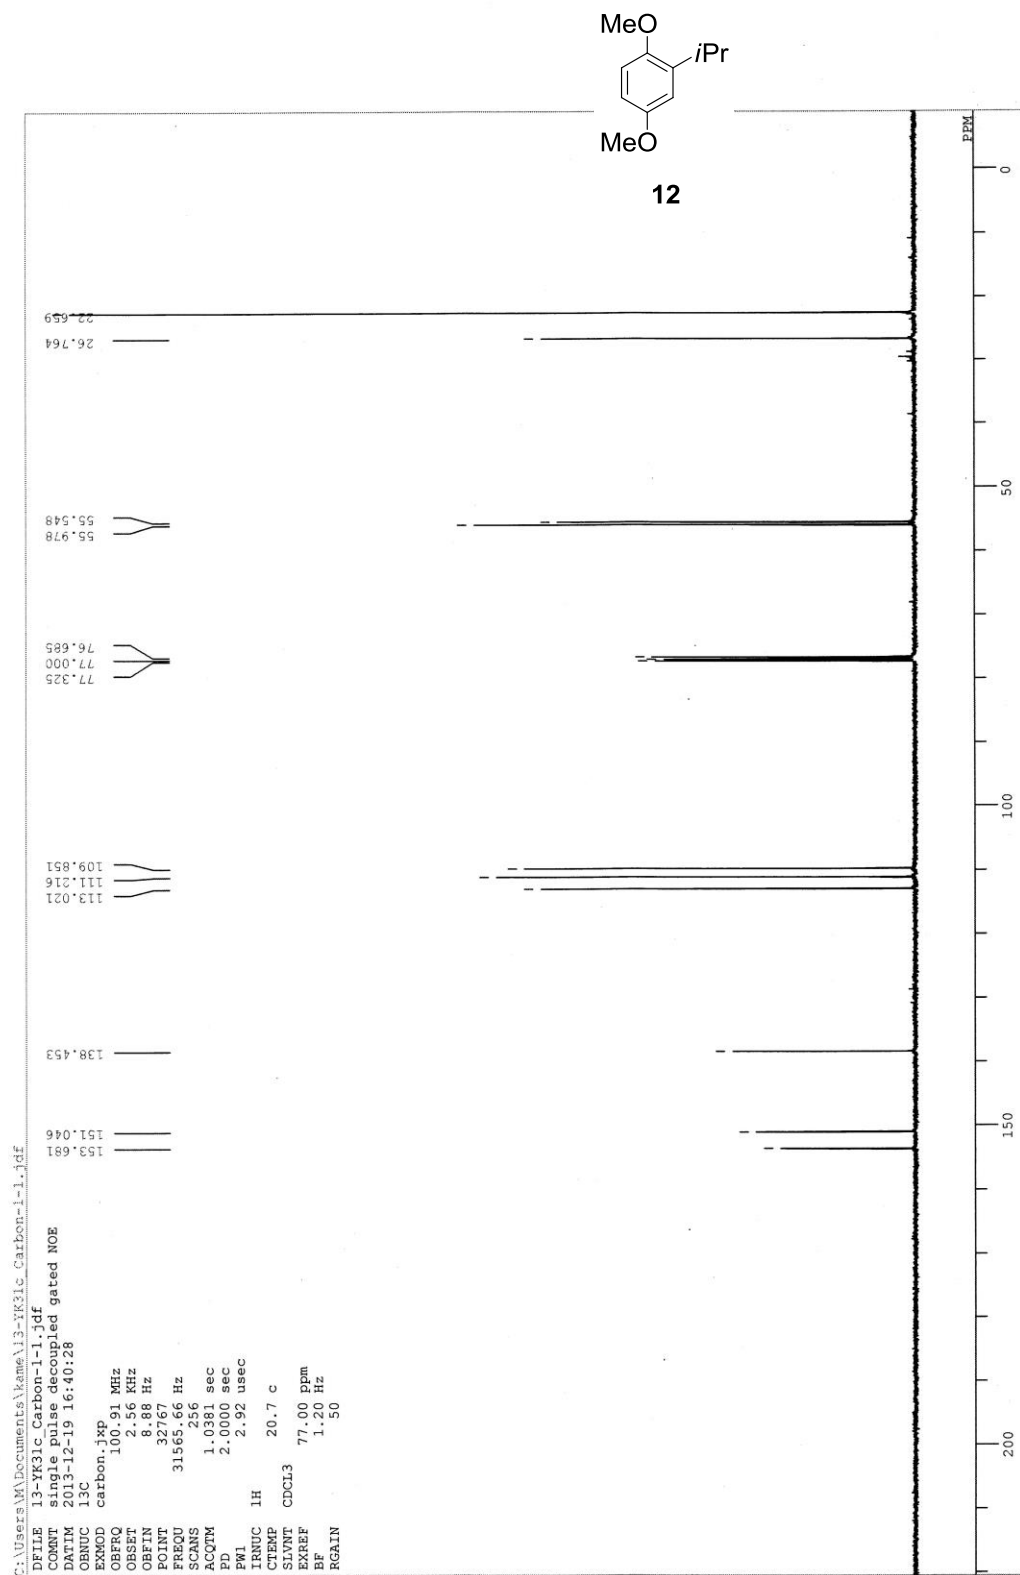

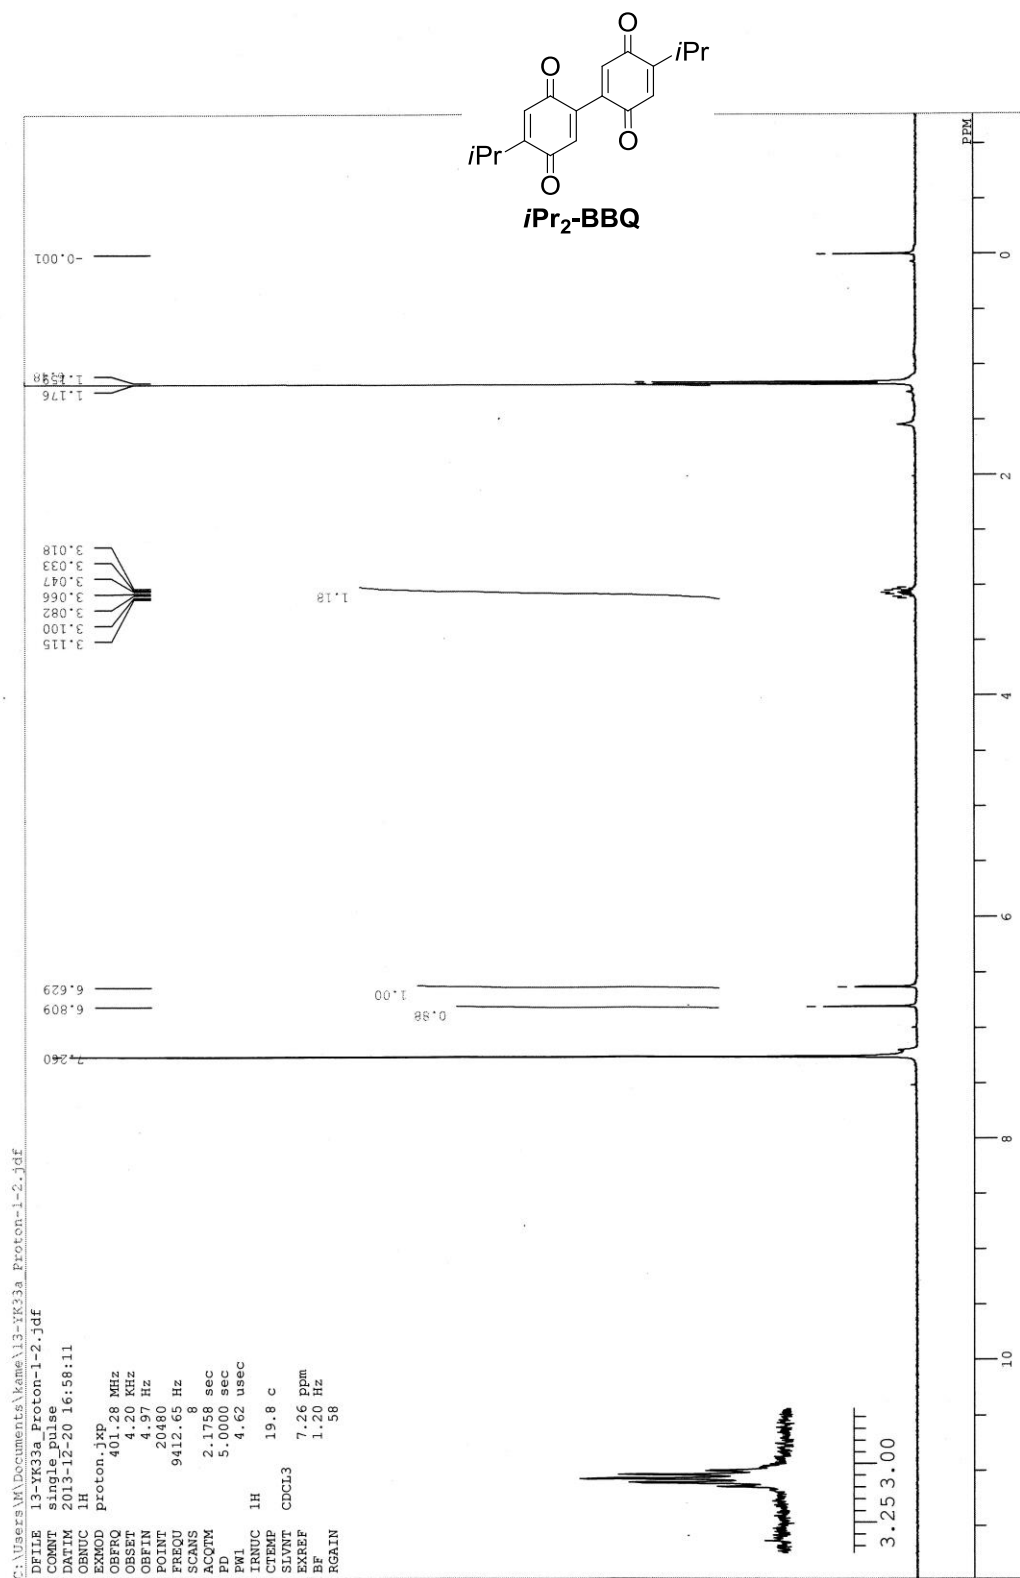

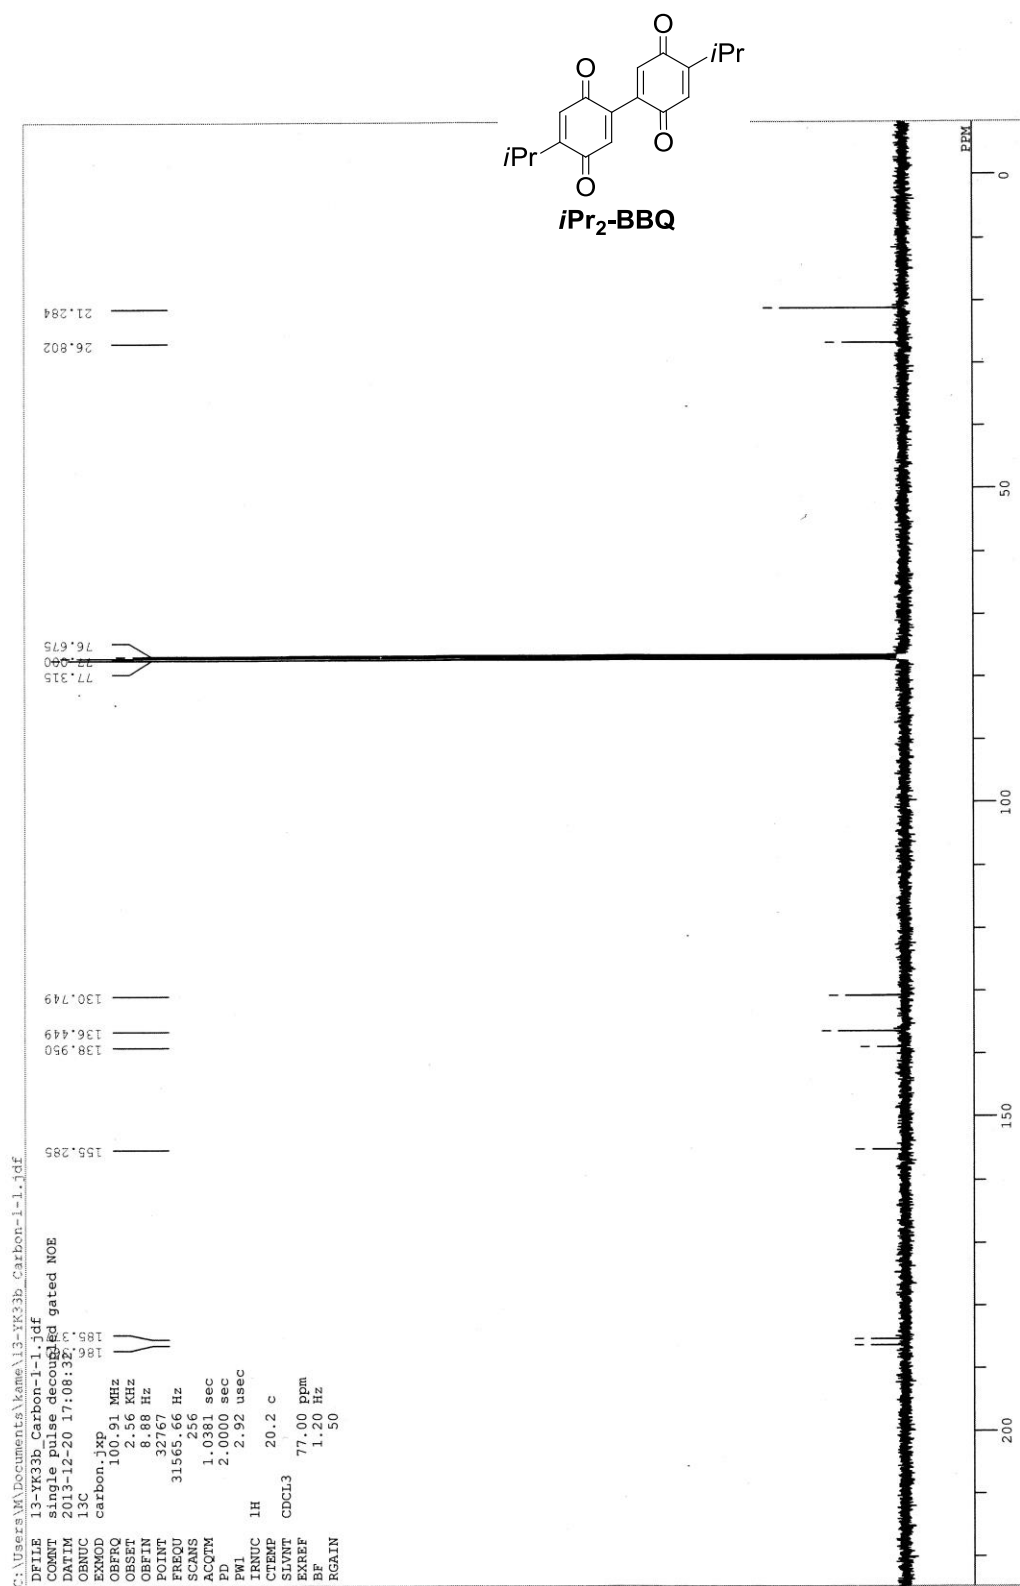

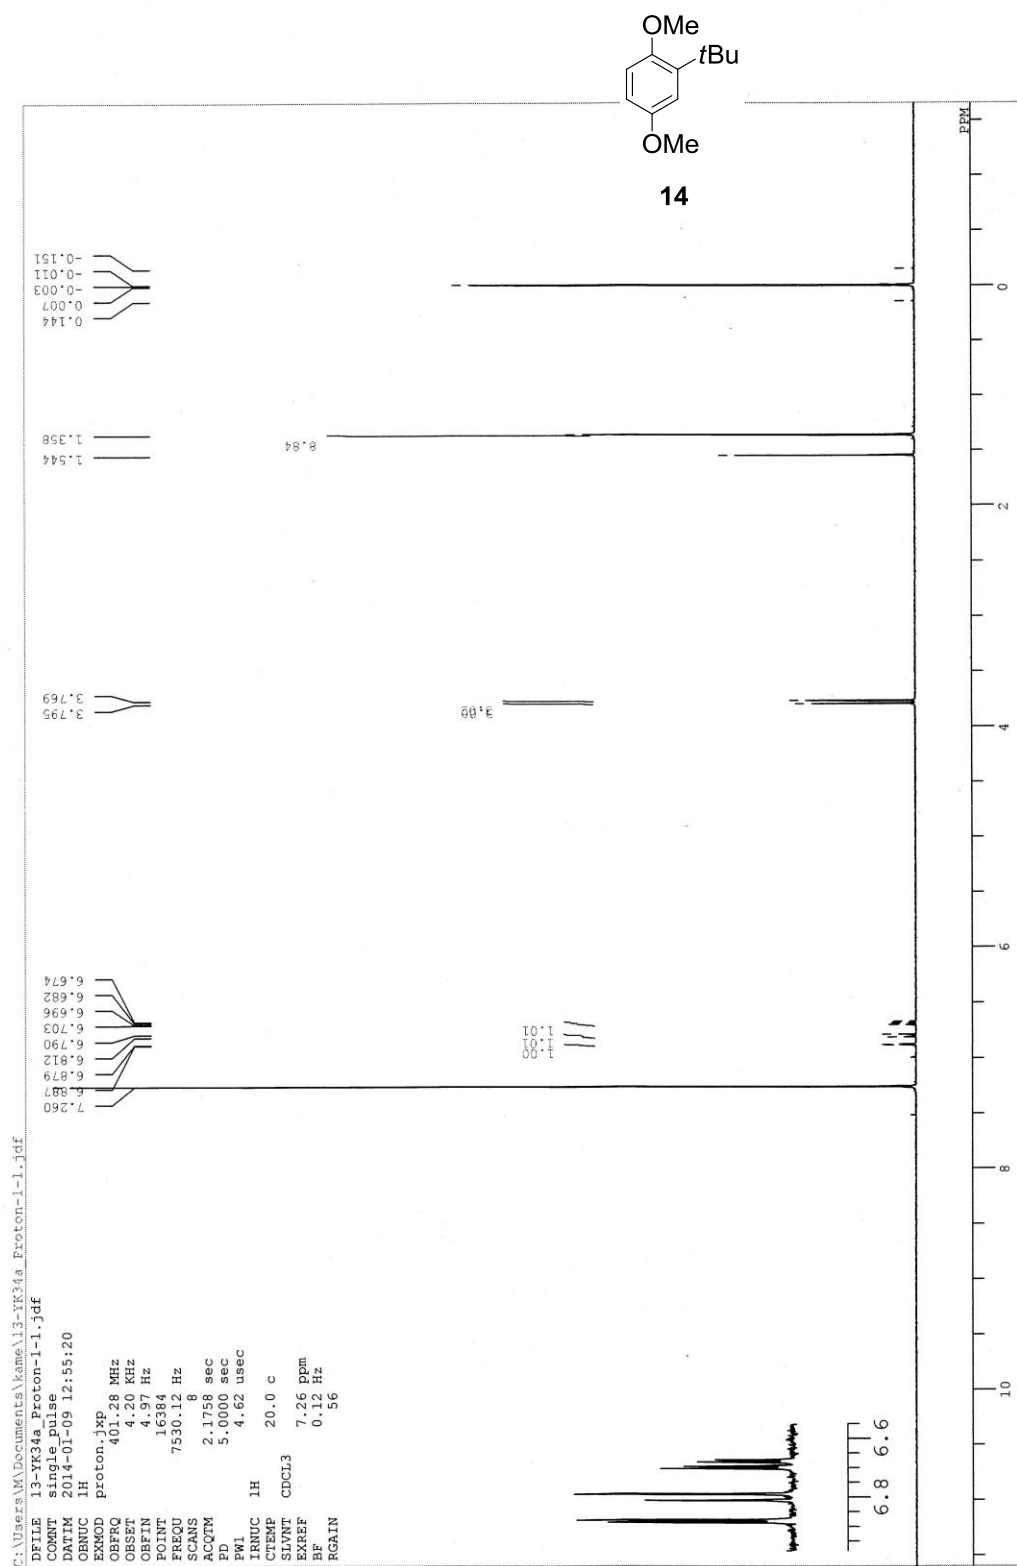

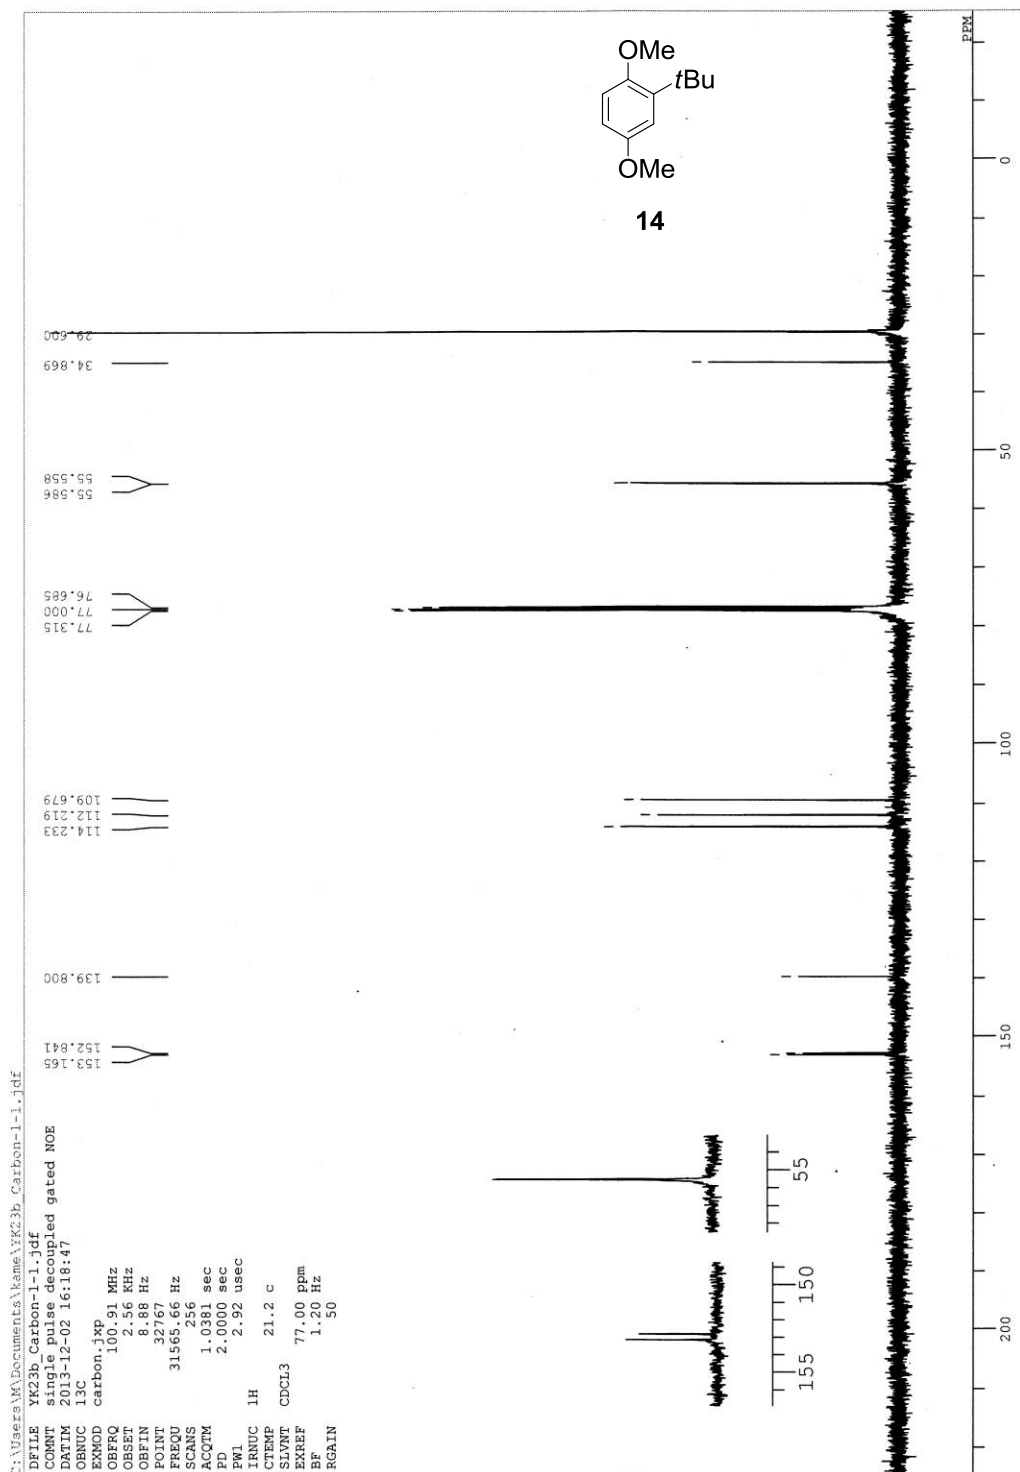

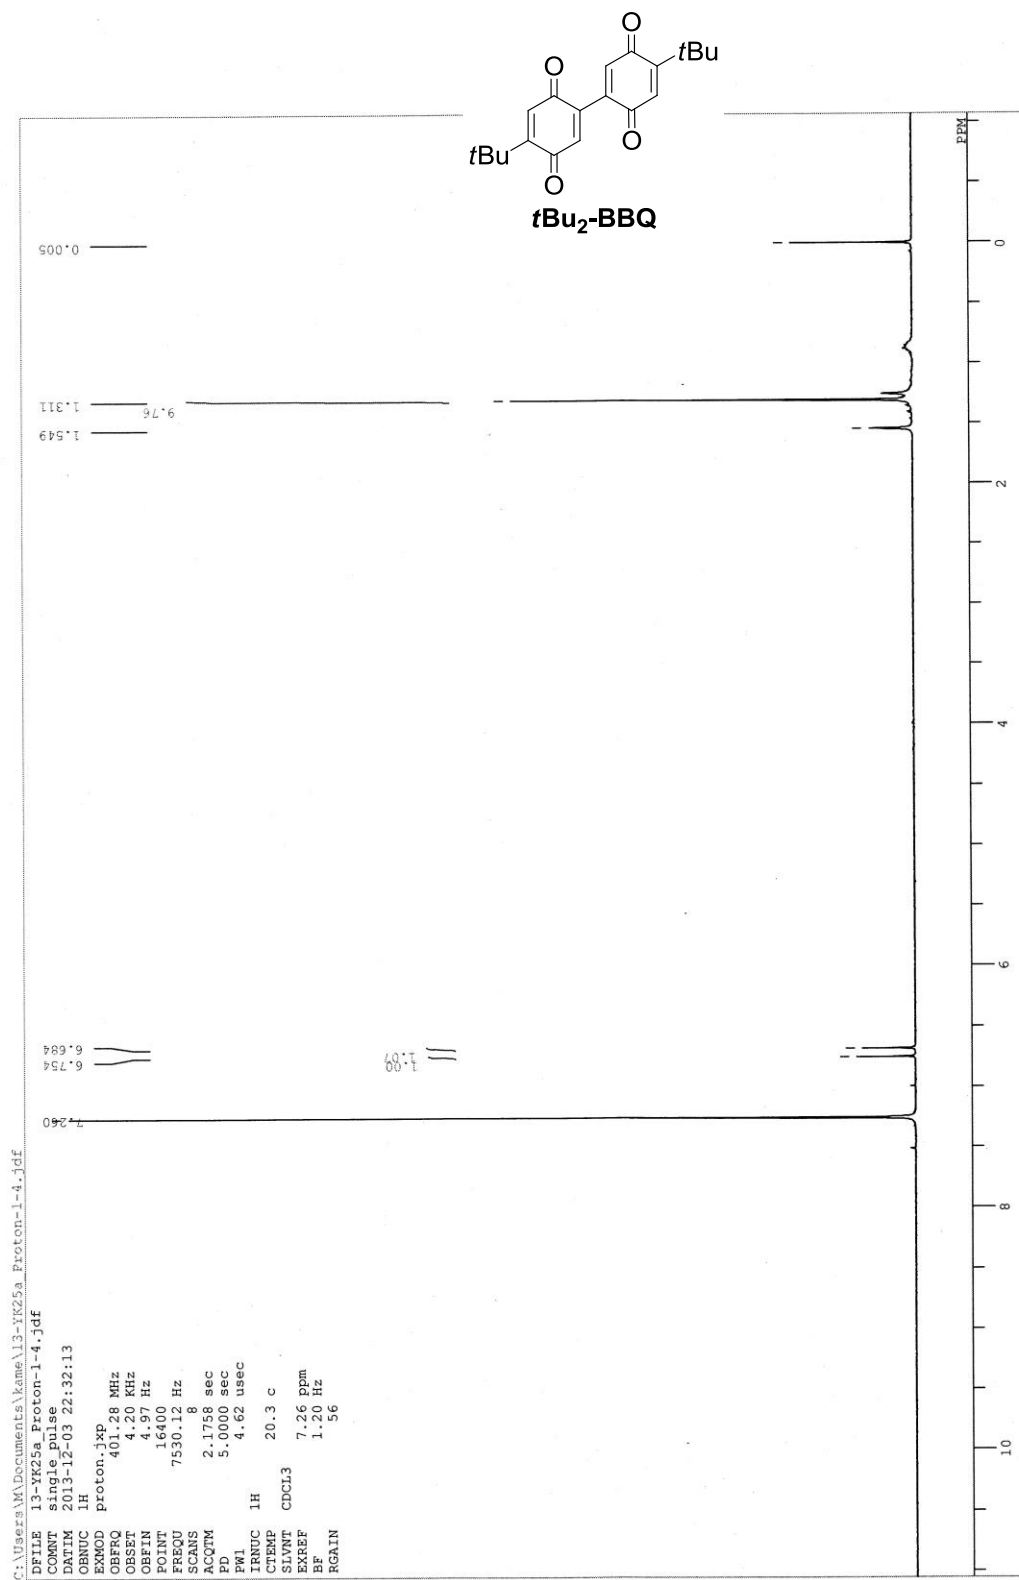

C:\Users\A\Documents\kame\13-YK25d\_Carbon-1-2.jdf

DFILE 13-YK25d\_Carbon-1-2.jdf

COMMT single pulse decoupled gated NOE

DATIM 2013-12-04 15:57:13

ORNUC 13C

EXMOD carbon.jxp

OEFRQ 100.91 MHz

OESST 2.56 KHz

OEFIN 8.88 Hz

POINT 40960

FREQU 39457.07 Hz

SCANS 256

ACQTM 1.0381 sec

PD 2.0000 sec

PW1 2.92 usec

IRNUC 1H

CTEMP 20.8 c

SLVNT CDCL3

EXREF 77.00 ppm

BF 0.12 Hz

RGAIN 50

29.036  
35.299

76.675  
77.315  
77.000

131.904  
137.566  
138.033

156.363

156.363  
156.363

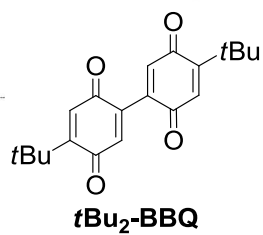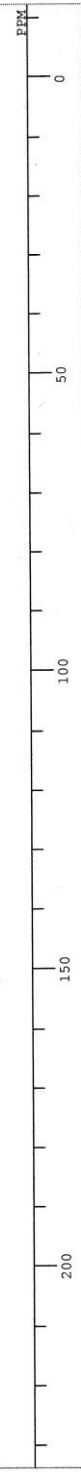

Supplement: c5ta10713j1.pdf [file c5ta10713j1.pdf]
